# Analysis of gut microbiota and metabolites in patients with rheumatoid arthritis and identification of potential biomarkers

Yumei Chen<sup>1</sup>, Chiyu Ma<sup>1,4</sup>, Lixiong Liu<sup>2</sup>, Jingquan He<sup>1</sup>, Chengxin Zhu<sup>1</sup>, Fengping Zheng<sup>1</sup>, Weier Dai<sup>3</sup>, Xiaoping Hong<sup>2</sup>, Dongzhou Liu<sup>2,&</sup>, Donge Tang<sup>1</sup>, Yong Dai<sup>1,4</sup>

<sup>1</sup>Clinical Medical Research Center, Guangdong Provincial Engineering Research Center of Autoimmune Disease Precision Medicine, Shenzhen Engineering Research Center of Autoimmune Disease, The Second Clinical Medical College of Jinan University, The First Affiliated Hospital Southern University of Science and Technology, Shenzhen People's Hospital, Shenzhen 518020, Guangdong, People's Republic of China

<sup>2</sup>Department of Rheumatology and Immunology, The Second Clinical Medical College of Jinan University, The First Affiliated Hospital Southern University of Science and Technology, Shenzhen People's Hospital, Shenzhen 518020, Guangdong, People's Republic of China

<sup>3</sup>College of Natural Science, University of Texas at Austin, Austin, TX 78721, USA

<sup>4</sup>Guangxi Key Laboratory of Metabolic Disease Research, Guilin No. 924 Hospital, Guilin 541002, Nanning, People's Republic of China

**Correspondence to:** Dongzhou Liu, Donge Tang, Yong Dai; **email:** [liu\\_dz2001@sina.com](mailto:liu_dz2001@sina.com), <https://orcid.org/0000-0003-3766-6562>; [donge66@126.com](mailto:donge66@126.com), <https://orcid.org/0000-0001-7011-196X>; [daiyong22@aliyun.com](mailto:daiyong22@aliyun.com), <https://orcid.org/0000-0002-6840-9158>

**Keywords:** rheumatoid arthritis, gut microbiota, metabolites, biomarkers

**Received:** April 17, 2021

**Accepted:** September 29, 2021

**Published:** October 20, 2021

**Copyright:** © 2021 Chen et al. This is an open access article distributed under the terms of the [Creative Commons Attribution License](https://creativecommons.org/licenses/by/3.0/) (CC BY 3.0), which permits unrestricted use, distribution, and reproduction in any medium, provided the original author and source are credited.

## ABSTRACT

Rheumatoid arthritis (RA) is an autoimmune disease described by joint destruction, synovitis and pannus formation. The gut microbiota acts as an environmental factor that plays an important role in RA, but little research regarding the etiopathogenic mechanisms of the microbiome in RA has been carried out. We used an integrated approach of 16S rRNA gene sequencing and ultrahigh-performance liquid chromatography-mass spectrometry-based metabolomics to analyze the structure and diversity of the intestinal flora and metabolites of the gut microbiota in RA patients compared with healthy subjects. In this study,  $\alpha$ -diversity analysis of the gut microbiota showed that there was no significant difference between the healthy control (HC) and RA groups. However,  $\beta$ -diversity analysis showed that there was a significant difference between the two groups. Further analysis of alteration of the gut microbiota revealed that at the phylum level, the relative abundance of p\_Bacteroidetes was significantly decreased in the RA group, while that of Verrucomicrobia and Proteobacteria was significantly increased in the RA group. At the genus level, Bacteroides, Faecalibacterium and some probiotics were decreased in the RA group, while 97 genera, including *Lactobacillus*, *Streptococcus* and *Akkermansia*, were increased in the RA group. Seventy-four differentially abundant metabolites were identified between the HC and RA groups, and we identified two potential biomarkers (9,12-octadecadiynoic acid and 10Z-nonadecenoic acid) in RA.

## INTRODUCTION

Rheumatoid arthritis (RA) is a systemic autoimmune disease characterized by chronic inflammation of the

joints, bone erosion and cartilage destruction [1]. In 2015, RA was reported to affect approximately 24.5 million people worldwide [2]. The incidence of RA in China is approximately 0.37%, and the total

number of RA patients is approximately 5 million [3]. Although major progress has been made in the treatment and prognosis of RA, the relief rate is only 8.6%. The cost of drug treatment and the economic loss caused by loss of the labor force are tremendous burdens on the families of patients with RA and society.

Increasing evidence has shown that an imbalance in the gut microbiota leads to the occurrence and development of RA and other rheumatic diseases [4, 5]. Autoimmune disease may proceed through a pathogenic mechanism in which the gut microbiota and their metabolites regulate immune function [6, 7]. At present, whether rheumatoid arthritis is related to an imbalance in the gut microbiota remains controversial [8, 9]. However, many bacteria, including *Bacteroides* [10]; pathogens, such as *Prevotella copri* [11]; and probiotics, such as *Bifidobacterium* [12], are thought to be related with the progress of RA. Several mechanisms leading to immune abnormalities in RA have been reported; these mechanisms include the production of citrullinated peptides by *Porphyromonas gingivalis* [13] and the activation of immune responses via Th17 cells by *P. copri* [14]. In mice, host intestinal Th17 lymphocytes are induced by commensal bacteria and segmented filamentous bacteria (SFB). The introduction of SFB into germ-free mice caused the induction of lamina propria Th17 cells, the production of autoantibodies, and arthritis [15]. However, the etiology of RA linked to the microbiome remains unknown.

To analyze the structure and diversity of the intestinal flora in patients with RA and identify different metabolites in feces, we extracted total DNA from the fresh feces of 30 healthy controls and 29 patients with RA for 16S rRNA gene sequencing and metabolic spectrum analysis via ultra-high-performance liquid chromatography-mass spectrometry (UHPLC-MS). We found some differences in the intestinal flora. In addition to candidate biomarkers that may be strongly associated to the incidence and development of RA, differentially abundant metabolites may be valuable for the early diagnosis and treatment of RA.

## RESULTS

### Clinical information

The RA patients and healthy subjects were South Chinese individuals with similar eating habits to exclude dietary differences. The clinicopathological variables of the HC and RA groups were generally matched. The ages and triglyceride, total cholesterol, creatinine, and serum albumin levels in the HC and RA groups are shown in Table 1.

### Sequencing depth and diversity analysis of the gut microbiota

Gut microbiota profiles of the healthy subjects and the RA patients were analyzed by 16S rRNA gene sequencing. We observed that both the richness and the evenness of the gut microbiota were high in the HC and RA groups (Figure 1A), indicating that we can obtain sufficient sequencing information from these samples in the two groups. After data filtering, we obtained 4241288 clean tags, 2177148 of which were from the HC group (range, 68085 to 74519) and 2064140 of which were from the RA group (range, 50304 to 76306). Then, we carried out operational taxonomic units (OUTs) taxonomic analysis and acquired 408 and 411 OTUs from the HC group and RA group, respectively, and among these OTUs, 404 OTUs were shared by the HC and RA groups (Figure 1B). Principal coordinate analysis (PCoA) score analysis showed that the HC and RA samples were distributed in two groups (Figure 1C). The  $\alpha$ -diversity analysis of the ACE, Chao1, Shannon and Simpson indices showed no significant differences between the HC and RA groups (Figure 1D). Specifically, Chao1 and Ace reflect the species richness of samples, namely, the amount of species. Shannon and Simpson indices reflect the species diversity of the samples. However,  $\beta$ -diversity analysis showed significant differences between the HC and RA groups, which was significant according to PERMANOVA ( $p = 0.001$ ) and ANOSIM analysis ( $p = 0.001$ ), as showed in Supplementary Figure 1.

### Composition analysis of the gut microbiota

A total of 10 phyla in the intestinal flora were identified by 16S rRNA sequencing of the HC and RA groups. Firmicutes, Bacteroidetes, Proteobacteria and Actinobacteria were the main components of the HC and RA groups, as shown in Figure 2A. Firmicutes was the most predominant phylum, accounting for 59.4% and 59.1% of the species identified in the HC and RA groups, respectively. Bacteroidetes was more abundant in the HC group than in the RA group (23.0% versus 15.2%, respectively,  $p = 0.0132$ ), while Proteobacteria (8.6% versus 12.4% in the HC and RA groups, respectively) and Verrucomicrobia (1.1% versus 4.9% in the HC and RA groups, respectively,  $p = 0.0075$ ) were less abundant in the HC group than in the RA group (Figure 2B, 2C). Then, to assess differences in the microbiota of the HC and RA groups, we conducted a Wilcoxon test. According to the criterion of a  $p$  value  $< 0.05$ , we found that Bacteroidetes, Cyanobacteria, Synergistetes and Verrucomicrobia were significantly different phyla between the HC and RA groups.

**Table 1. The clinical index of healthy controls (HC) and RA patients (RA).**

| Clinical index            | HC (n=30)     | RA (n=29)     |
|---------------------------|---------------|---------------|
| Age (Years)               | 44.1±1.9070   | 58.9±2.5930   |
| Triglyceride (mol/L)      | 1.505±0.2373  | 1.289±0.1599  |
| Total cholesterol (mol/L) | 4.555±0.1494  | 4.429±0.1777  |
| Creatinine (μmol/L)       | 75.43±3.2420  | 61.36±2.7270  |
| Serum albumin (g/L)       | 44.76±0.5605  | 34.24±0.9881  |
| HDL cholesterol (mol/L)   | 1.467±0.0597  | 1.199±0.0822  |
| LDL cholesterol (mol/L)   | 2.472±0.1149  | 2.659±0.1306  |
| Globulin (g/L)            | 26.56±0.7955  | 34.38±1.4650  |
| Urea nitrogen (mmol/L)    | 4.78±0.2252   | 5.378±0.4498  |
| Uric acid (μmol/L)        | 339.5±15.6500 | 297.1±14.8400 |
| Total bilirubin           | 14.54±1.1490  | 7.117±0.6790  |

Values are mean ± standard deviation; HDL, high density lipoprotein; LDL, low density lipoprotein.

At the genus level, *Faecalibacterium*, *Bacteroides*, *Escherichia-Shigella*, *Blautia*, *Prevotella\_9*, *Bifidobacterium*, *Subdoligranulum*, *Agathobacter*, *Akkermansia*, and *Streptococcus* were the main components of the HC and RA groups, as shown in Figure 3A–3C. Of them, *Streptococcus* (0.8% versus 3.5%, respectively,  $p=0.0013$ ) and *Akkermansia* (1.1% versus 4.9%, respectively,  $p=0.0093$ ) were significantly different genera between the HC and RA groups. A total of 159 bacterial genera were obtained between the HC and RA groups, of which 62 genera were less abundant in the RA group, including *g\_uncultured\_bacterium\_f\_Prevotellaceae*, *g\_Prevotella*, *g\_Faecalibacterium*, *g\_Bifidobacterium*, *g\_Bacteroides*, *g\_Ruminococcus\_1*,

*g\_Ruminococcaceae\_UCG-002*, *g\_Lachnospiraceae\_UCG-001*, and *g\_Fusobacterium*, while 97 genera were more abundant in the RA group, including *g\_Lactobacillus*, *g\_Streptococcus*, *g\_Akkermansia*, *g\_Blautia*, and *g\_Eggerthella*. In addition, 43 of 159 genera were significantly different ( $p<0.05$ ) between the HC and RA groups (Supplementary Table 1).

#### Screening the differentially abundant gut microbiota caused by RA disease

By the LefSe (linear discriminant analysis effect size) method [16] and according to the filter criterion of “LDA score>4”, biomarkers with significant

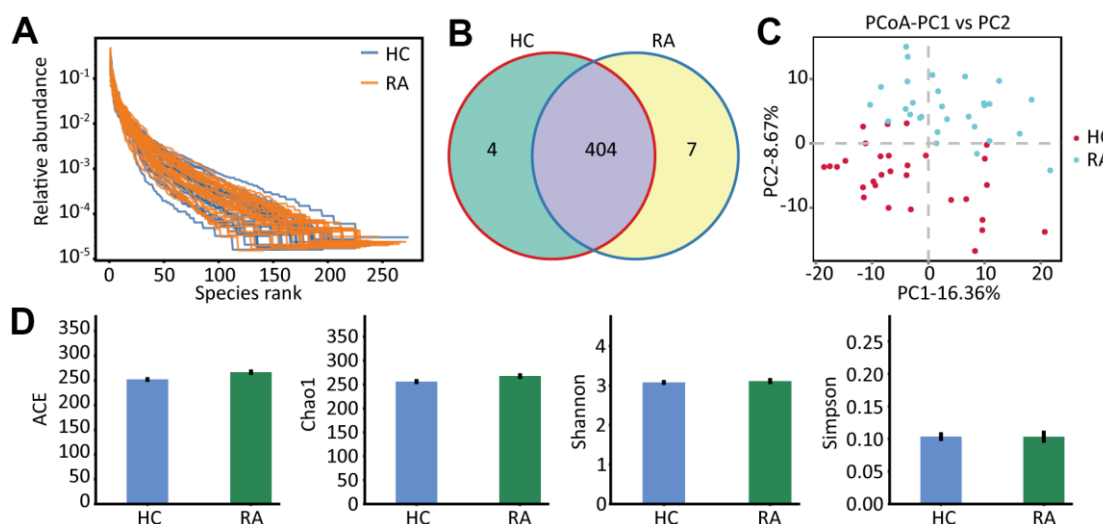

**Figure 1. The species abundance and diversity.** (A) The rank abundance curve of HC and RA group. (B) The OTUs (97% similarity) of HC and RA group. (C) The principal coordinate analysis score (PcoA) plots base on the relative abundance of OTUs, unweighted unifracs PcoA plots between HC group and RA group. HC group showed in red dots, RA group showed in blue dots. (D) Species  $\alpha$ -diversity differences between the HC group and RA group (ACE, Chao1, Shannon and Simpson index).

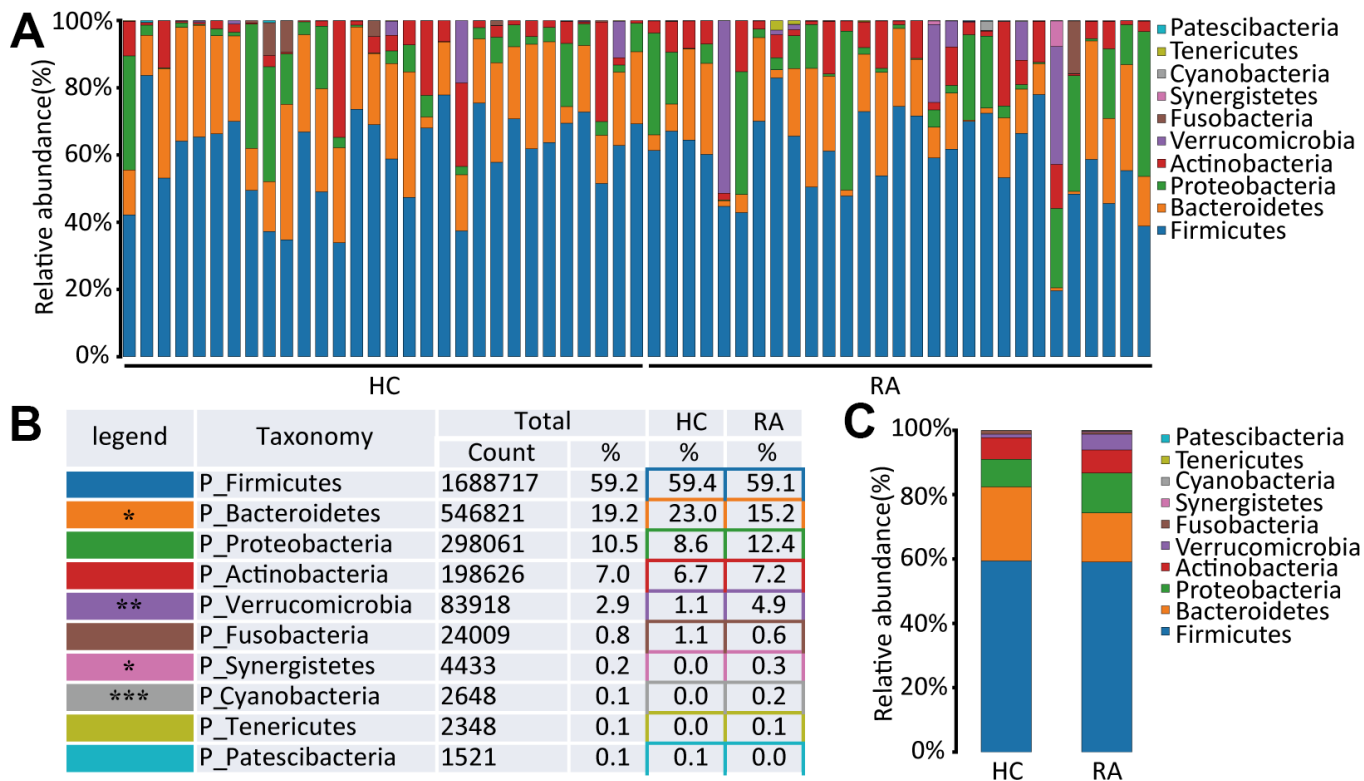

**Figure 2. The species abundance at phylum level.** (A) Relative abundance of gut microbiota in every samples at phylum level, n=30 for HC group and n=29 for RA group. (B, C) Component proportion of gut microbiota at phylum level in HC and RA group.

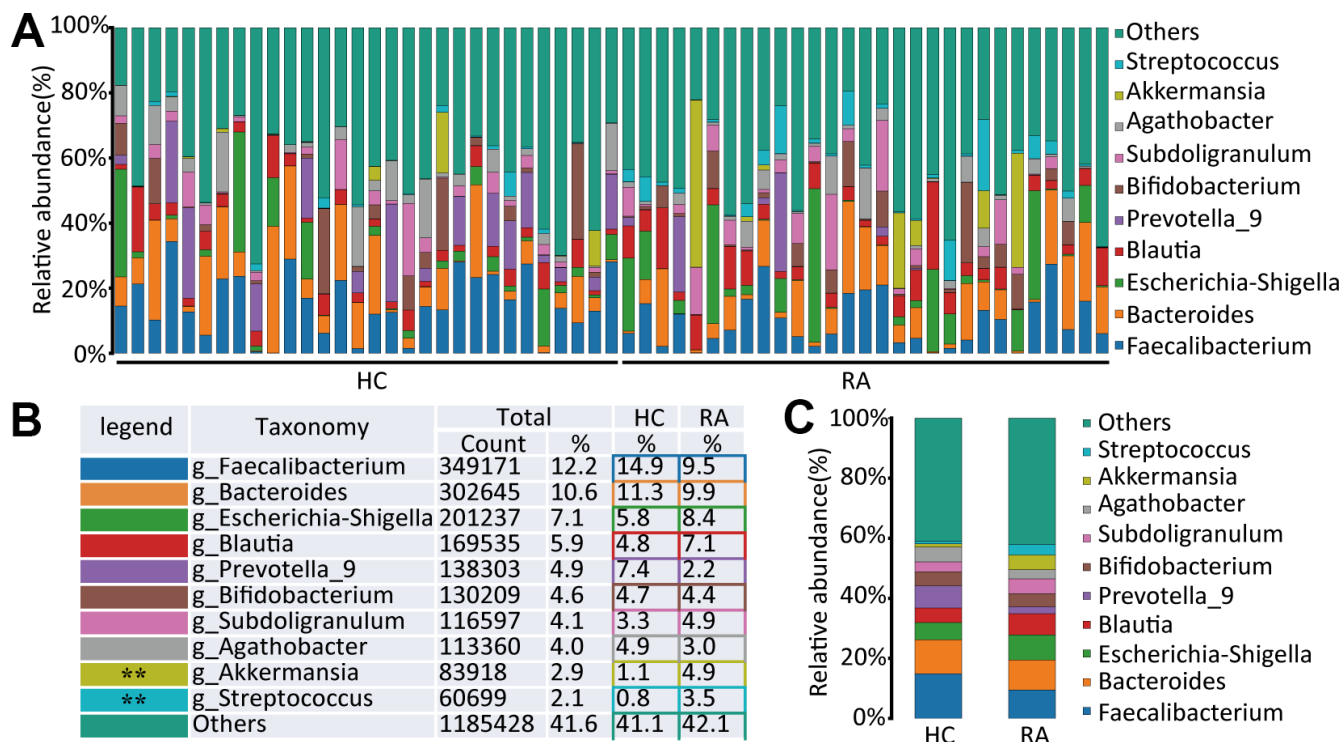

**Figure 3. The species abundance at genus level.** (A) Relative abundance of gut microbiota in every samples at the genus level, n=30 for HC group and n=29 for RA group. (B, C) Component proportion of gut microbiota at the genus level in HC and RA group.

differences between the HC and RA groups were identified. In the cladogram and histogram in Figure 4A, 4B, circles moving from the inside to the outside of the cladogram represent the taxonomic level from phylum to species, and the diameter of each small circle is proportional to the relative abundance in the gut microbiota. The letters p, c, o, f, g and s represent phylum, class, order, family, genus and species, respectively. From the phylum to species classification levels, a total of 20 significantly different components of the intestinal flora (LDA score >4) between the HC and RA groups were identified. Among these components, p\_Verrucomicrobia, c\_Verrucomicrobiae, c\_Bacilli, o\_Verrucomicrobiales, o\_Lactobacillales, f\_Streptococcaceae, f\_Akkermansiaceae, g\_Blautia, g\_Akkermansia, g\_Streptococcus, s\_uncultured\_bacterium\_g\_Blautia, s\_uncultured\_bacterium\_g\_Akkermansia and s\_uncultured\_bacterium\_g\_Streptococcus were more abundant in the RA group, while p\_Bacteroidetes, c\_Bacteroidia, o\_Bacteroidales, f\_Ruminococcaceae, f\_Prevotellaceae, g\_Faecalibacterium and s\_uncultured

bacterium\_g\_Faecalibacterium were more abundant in the HC group.

### Multivariate analysis of fecal metabolite profiles

Fecal metabolic profiles of the HC and RA groups were obtained by UHPLC-MS. In the Orthogonal projections to latent structures discriminant analysis (OPLS-DA) model, the fecal samples were clearly separated, with a difference in the metabolic profiles of the HC group and RA group found in both negative ion mode (NEG) and positive ion mode (POS), as shown in Supplementary Figure 2A, 2B. This finding suggests that rheumatoid arthritis can lead to significant changes in metabolites. Then, we screened out differential metabolites between the HC and RA groups and displayed them by volcano plot, as showed in Supplementary Figure 1C, 1D. And red dot indicated that compare with HC group, metabolites were up-regulated in RA group, blue dot indicated that metabolites were down-regulated in RA group.

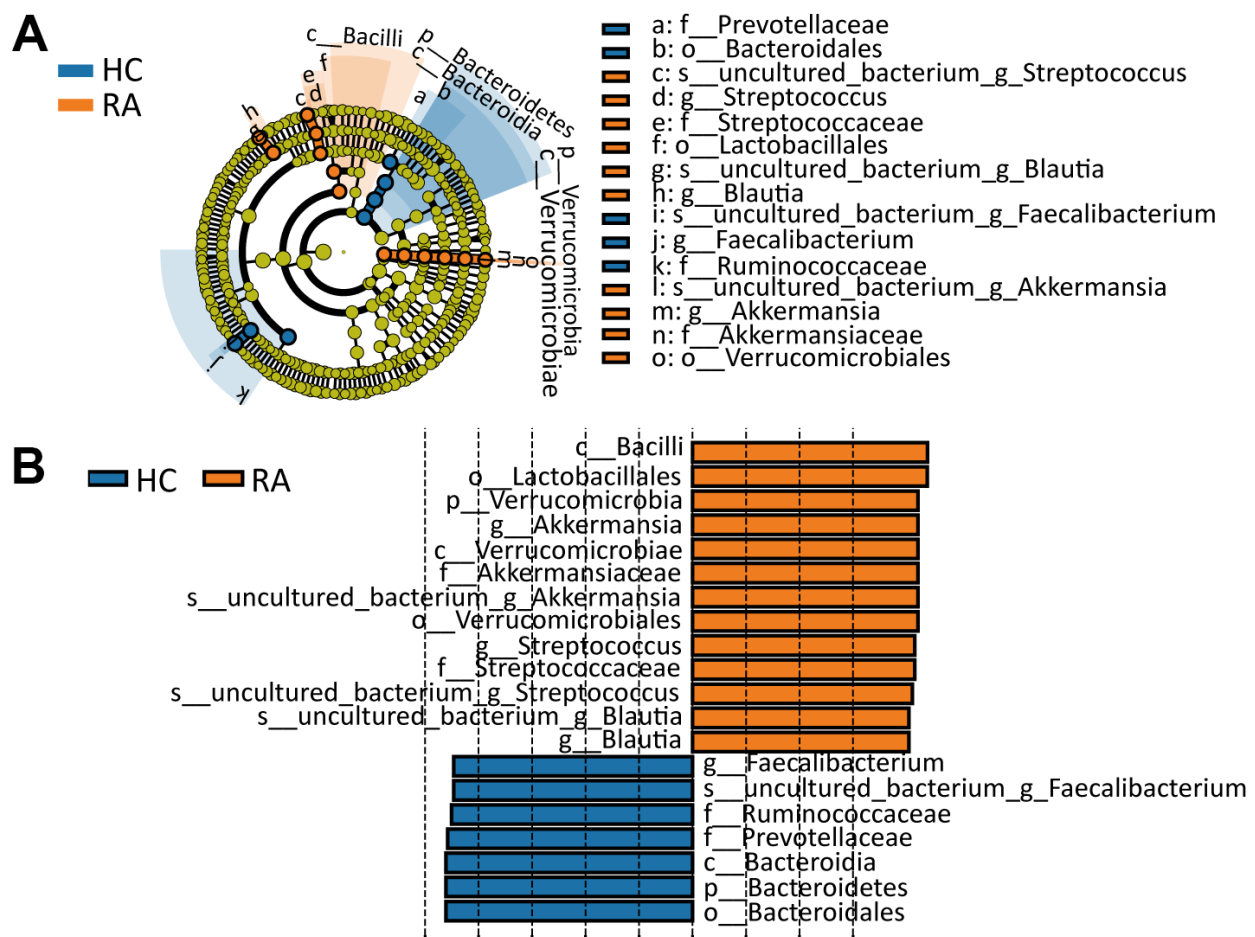

**Figure 4. Line discriminant analysis (LDA) effect size analysis.** (A) Cladogram indicating the phylogenetic distribution of differential gut microbiota between the HC or RA group. (B) The differential gut microbiota with LDA Score >4 between the HC and RA groups.

## Identification of differentially abundant metabolites between the HC and RA groups

The 16S rRNA gene sequencing results showed that some components of the fecal microbiota significantly differed between the HC and RA groups; thus, we inferred that alterations in the fecal microbiota may lead to alterations in fecal metabolites. Then, we performed UHPLC-MS analyses and successfully obtained 279 metabolites in the NEG mode and 1045 metabolites in the POS mode (Supplementary Table 1). According to the conditions “VIP > 1 and P < 0.05”, 29 differentially abundant metabolites between the HC and RA groups were acquired in negative ion mode; 3 of these metabolites were decreased, while 26 metabolites were increased. In positive ion mode, 45 differentially abundant metabolites between the HC and RA groups were acquired; 12 of these metabolites were decreased, while 33 metabolites were increased. We discovered that some peptides (Val Thr Ile, Ile Gly Gly Ile, Val Asn Ile, etc.), amino acids (lysine, methionine) and nucleotides (thymidine, deoxyuridine, deoxyinosine, deoxyguanosine, etc.) were increased in the RA group

compared with the HC group; however, some lipids (LPA(0:0/16:0), 16,16-dimethyl-PGA, 1,5-HETE, 12(R)-HEPE, etc.) were decreased in the RA group compared with the HC group (Figure 5).

## Pathways analysis of differentially abundant metabolites

Then, we analyzed the pathways enriched in the differentially abundant metabolites mentioned above with the MetaboAnalyst website (<https://www.metaboanalyst.ca/>), the results of which are shown in Figure 6A. We found two pathways significantly enriched in the metabolites: the purine metabolism (p=0.01 and impact value=0.02) and histidine metabolism (p=0.02 and impact value=0.12) pathways. The metabolites xanthine, deoxyinosine, deoxyguanosine and uric acid were enriched in the purine metabolism pathway, while the metabolites urocanate and 4-imidazolaetic acid were enriched in the histidine metabolism pathway. These results suggest that alteration of the fecal microbiota leads to metabolic pathway alterations, especially in nucleic acid metabolism and amino acid metabolism.

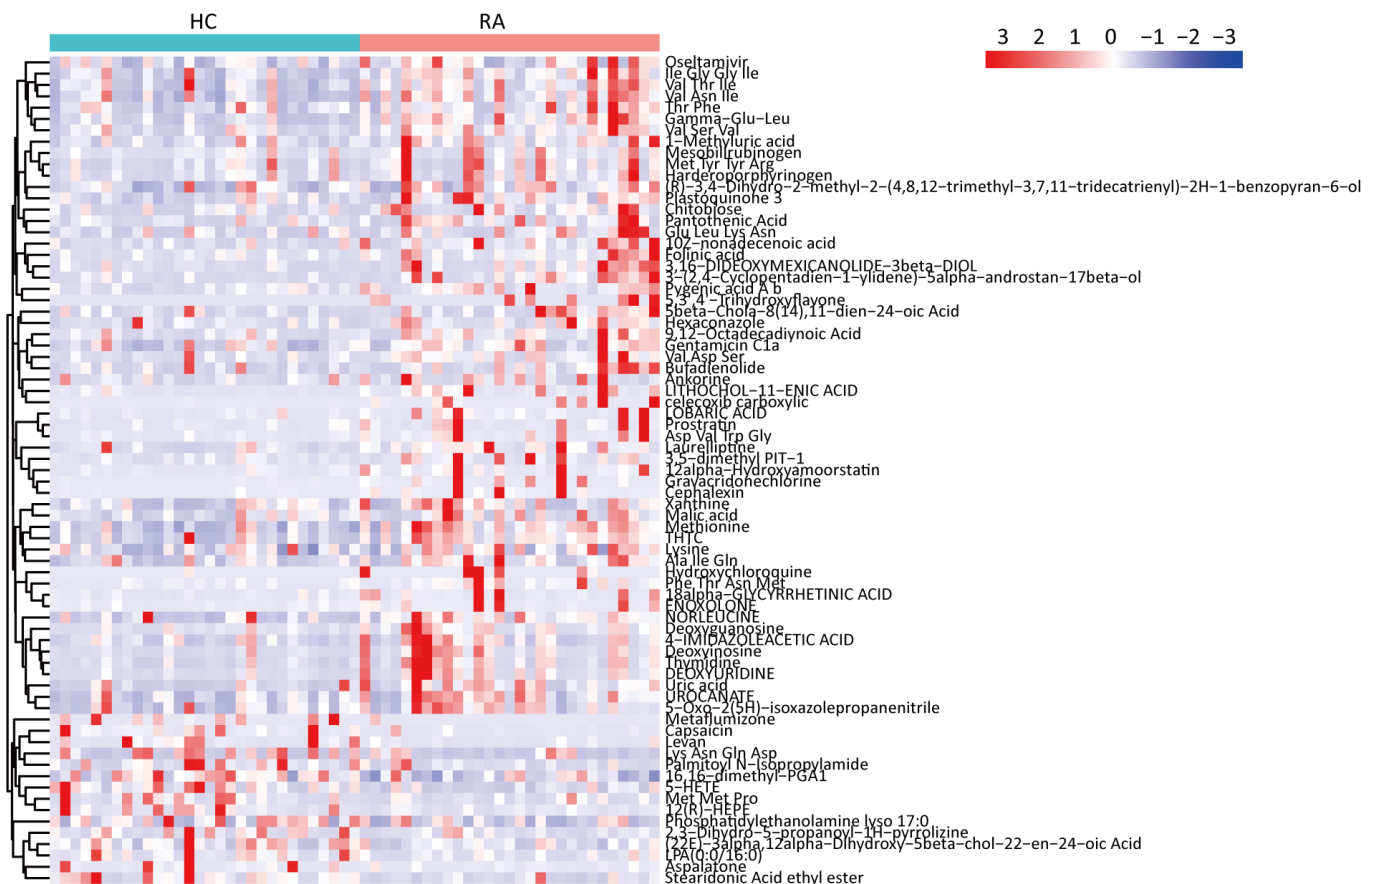

Figure 5. Significantly changed metabolites heatmap in feces samples between HC and RA group.

## Correlation of the gut microbiota and fecal metabolites

According to the criteria “VIP>1.5” and “Fold Change (RA/HC)>2”, we obtained 38 metabolites whose abundance significantly differed between the HC and RA groups. Then, we performed Spearman’s correlation analysis and, based on Spearman’s correlation coefficients, found that in our study, *p\_Verrucomicrobia* and *g\_Akkermansia* were strongly positively correlated with 9,12-octadecadiynoic acid ( $r=0.54$ , corrected  $p$  value=0.01) and 10Z-nonadecenoic acid ( $r=0.54$ , corrected  $p$  value=0.03) (Figure 6B). Notably, both of the differentially abundant metabolites are long-chain fatty acids, which indicates that alteration of the gut microbiota may lead to long-chain fatty acid metabolic disorders, affecting the occurrence and development of RA.

Then, via receiver operating characteristic (ROC) curve analysis, we identified potential biomarkers and found that 9,12-octadecadiynoic acid (area under the curve (AUC)=0.718,  $p=0.0043$ ) and 10Z-nonadecenoic acid (AUC=0.739,  $p=0.0064$ ) were significantly higher in the RA group than in the HC group (Figure 6C, 6D).

## DISCUSSION

Rheumatoid arthritis is an autoimmune disease, and genetic and environmental factors play an important role in its occurrence and development. Numerous studies [17, 18] have shown that changes in the composition and function of the gut microbiota are closely related to RA; however, the influence of its components and their metabolism on RA remains unclear. In this study, using 16S rRNA gene sequencing and UHPLC-MS-based metabolomics, we assessed 30 healthy subjects and 29 RA patients to determine the effect of the gut microbiota and its metabolites on the occurrence and development of RA. The results of taxonomic analysis showed that the gut microbiota of the healthy control group and RA group significantly differed at the phylum and genus levels. We also found that the metabolites in the HC and RA groups were significantly different.

We found that  $\alpha$ -diversity analysis showed no significant differences between the healthy control (HC) and RA groups, and the composition of the gut microbiota in the RA patients was similar to that in healthy subjects, in accordance with a previous study [19]. However,

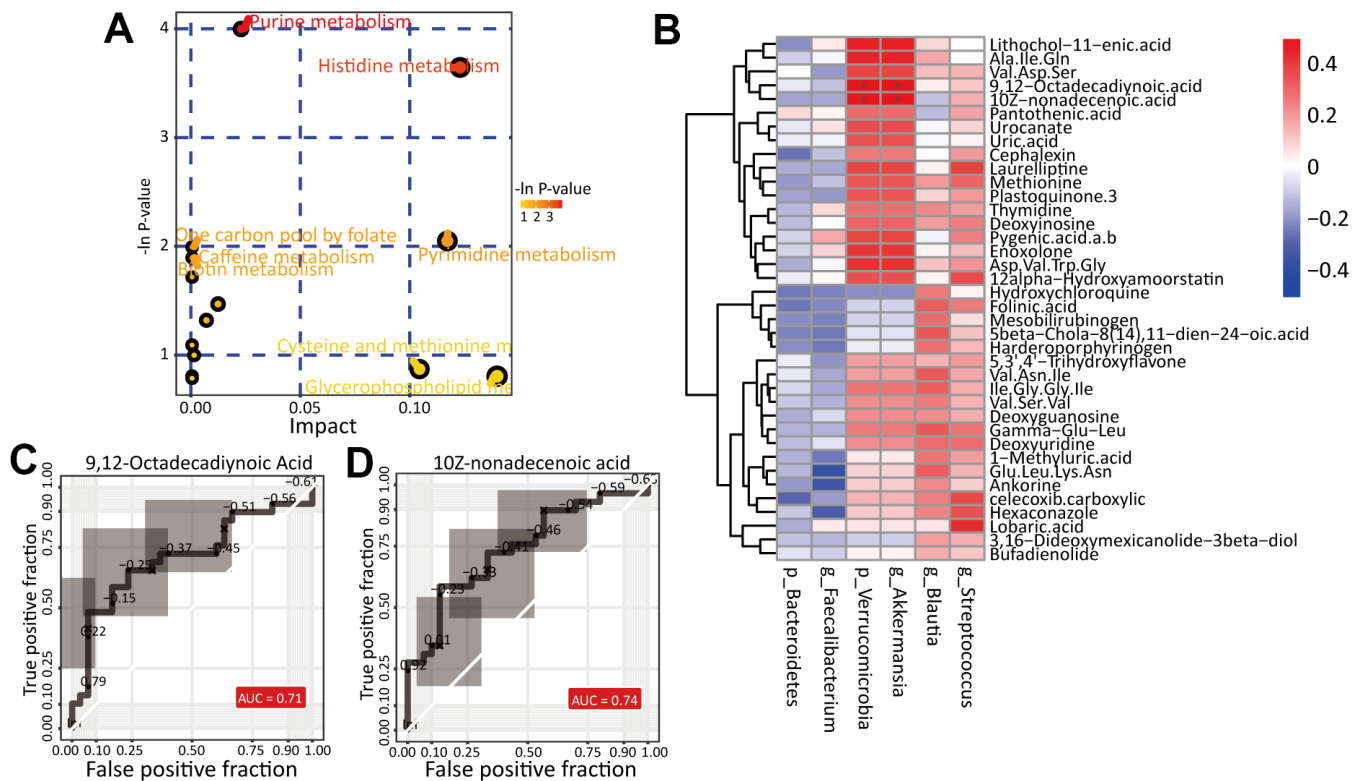

**Figure 6. Identification of potential biomarkers.** (A) The pathway analysis of differential metabolites. (B) Correlation analysis of differential gut microbiota and differential metabolites between HC and RA group. The ROC curve of biomarker analysis for 9,12-Octadecadiynoic Acid (C) and 10Z-nonadecenoic acid (D).

$\beta$ -diversity analysis showed that the healthy subjects and the RA patients were clearly separated, suggesting that the gut microbiota of the two groups was significantly different. At the phylum level, Firmicutes, Bacteroidetes, Proteobacteria and Actinobacteria were the main components in the gut microbiota of the healthy subjects and the RA patients [20]. We found that alterations in the gut microbiota were mainly in abundance but not in composition. At the genus level, we focused on the high content of the gut microbiota and were also interested in more significantly different genera. The main cause of intestinal flora imbalance is a decrease in probiotics (such as *Bifidobacterium*) and an increase in pernicious bacteria. Previous studies have shown that probiotics can simultaneously significantly alleviate the progression of RA and decrease the levels of inflammatory factors [21]. In our study, *Bifidobacterium* was decreased in the RA group, which may have accelerated the development of RA. However, studies on Chinese patients showed that *Lactobacillus* was increased in cases of very active RA [22, 23]. *Lactobacillus* was significantly more abundant in the HC group than in the RA group. This finding suggests that a probiotic imbalance is related to the active and inactive stages of RA, but the exact functions of probiotics during the occurrence and development of rheumatoid arthritis need further investigation. A previous report showed that *Prevotella* and *Bacteroides* had an inverse relationship in terms of their abundance in RA, and *Prevotella* was increased, while *Bacteroides* was reduced in RA cases [11]. In this study, both *Prevotella* and *Bacteroides* were decreased in the RA patients, and the trend in *Bacteroides* abundance was in accordance with the results of a previous study [10]. In other research, *Prevotella* spp. were more abundant in newly diagnosed RA patients than in healthy subjects but less abundant in confirmed RA cases [11, 24]. In addition, previous studies showed that the phylum Bacteroidetes was enriched in early RA patients [25], and changes in the gut microbiota are thought to be related to the stage of RA development. Our research also found that Verrucomicrobia and Akkermansia were more abundant in the RA patients [26]. Another study confirmed that the class Bacilli and order Lactobacillales were increased in RA patients not receiving therapy [27], which was confirmed by our results.

Alterations in the fecal microbiota may lead to alterations in fecal metabolites. We next performed UHPLC-MS analyses and successfully detected over 1000 metabolites from the fecal samples of the healthy subjects and the RA patients (Supplementary Table 1); among these metabolites, 29 differentially abundant metabolites were acquired in NEG, and 45 differentially abundant metabolites were acquired in POS. OPLS-DA showed that the RA patient samples clearly differed from the samples from the healthy subjects, suggesting

that the healthy subjects and the RA patients exhibit different metabolic phenotypes.

In our study, we identified two differentially abundant fatty acid metabolites as potential biomarkers. In previous studies, fatty acids were confirmed to be related to inflammation and increased in RA patients [28]. In addition, a new study found that various biological pathways related to metabolism, including fatty acid biosynthesis and glycosaminoglycan degradation, were enriched when groups of RA patients and healthy controls were compared [10]. Some long-chain fatty acids (such as  $\omega$ -3 fatty acids) have been demonstrated to play a protective role in RA and improve clinical symptoms in RA patients [29]. Besides, short-chain fatty acids are one of microbial metabolites, which have been reported to be key regulators of the gut-joint axis in animal models [30]. In our study, long-chain fatty acids (9,12-octadecadiynoic acid and 10Z-nonadecenoic acid) were increased in the RA patients and strongly positively correlated with p\_Verrucomicrobia and g\_Akkermansia, indicating that these two fatty acid metabolites may affect the occurrence and development of RA. However, understanding their functions requires further study.

## MATERIALS AND METHODS

### Collection of fecal samples

Ethical approval was obtained from the Shenzhen People's Hospital ethics committee (LL-KY-2020322). We collected fecal samples from 29 RA patients who were confirmed according to the RA diagnostic standards and 30 healthy subjects [31] in Shenzhen People's Hospital. All subjects were informed and signed a consent form. We collected fecal samples on a clean bench in a sterile environment and then stored them in a liquid nitrogen tank for 15 minutes. Next, they were stored at  $-80^{\circ}\text{C}$  in an ultralow temperature freezer for further analysis of the intestinal microbial community and metabolism.

### Gene sequencing analysis of 16S rRNA

The Mobio PowerSoil® DNA Isolation Kit (Qiagen, Hilden, Germany) was used to extract the total genomic DNA of the intestinal flora. The V3-V4 region of the 16S rRNA gene of the gut microbiota was amplified by PCR with the forward primer 5'-ACTCCTACGGAGGC AGCA-3' and the reverse primer 5'-GGACTACHGGG GTWTCTAAT-3'. VAHTSTM DNA magnetic beads were used to purify the PCR products, after which we used the previously obtained PCR products as a DNA template to perform Solexa PCR. After purification, the DNA concentrations were determined with a NanoDrop 2000 system, and DNA fragments were recovered by



1.8% agarose gel electrophoresis (120 V, 40 min). Based on the Illumina HiSeq 2500 sequencing platform, we constructed small fragment library with the paired-end method, and sequenced it.

FLASH (version 1.2.11) was used to split the reads of every sample and obtain the raw tags. Then, the raw tags were filtered with Trimmomatic (version 0.33) software, and clean tags were obtained. UCHIME (version 8.1) software was used to remove the chimera sequences, and finally, we obtained the effective tags. Then, the tags were clustered with QIIME (version 1.8.0) software, and OTUs with a similarity higher than 97% were considered the same OTU. Then, the species of each OTU sequence was matched to a microbiological reference database (Release128, <http://www.arb-silva.de>) to obtain the species information of every OTU classification. Alpha diversity analysis was used to analyze the species richness (Chao1 and ACE) and diversity (Shannon and Simpson indices) of the gut microbiota with the online software Mothur (version 1.30, <http://www.mothur.org/>). Beta diversity analysis, including principal coordinate analysis (PCoA), was used to analyze differences in the species composition of the gut microbiota among different samples by R language. Linear discriminant analysis (LDA) effect size (LEfSe) analysis was used to identify biomarkers with significant differences between the two groups (HC and RA).

## Fecal metabolite analysis

### LC-MS analysis

LC-MS analyses were performed using an UHPLC system (1290, Agilent Technologies) coupled to Q Exactive (Orbitrap MS, Thermo) and an HSS T3 UPLC column (2.1 mm × 100 mm, 1.8 μm). Mobile phase A was 5 mmol/L ammonium acetate in water for NEG model and 0.1% formic acid for POS mode, and mobile phase B was acetonitrile. The elution gradient was as follows: 0 min, 1% acetonitrile; 1 min, 1% acetonitrile; 8 min, 99% acetonitrile; 10 min, 99% acetonitrile; 10.1 min, 1% acetonitrile; and 12 min, 1% acetonitrile. The acquisition software (Xcalibur 4.0.27, Thermo) continuously evaluates the full-scan survey MS data as it collects and triggers the acquisition of MS/MS spectra depending on preselected criteria. The ESI source conditions were as follows: sheath gas flow rate of 45 arb, aux gas flow rate of 15 arb, capillary temperature of 400° C, full MS resolution of 70,000, MS/MS resolution of 17,500, collision energy of 20/40/60 eV in the NCE model, and spray voltage of 4.0 kV for POS and -3.6 kV for NEG.

### Data analysis

Then, with ProteoWizard, the raw data were converted to the mzXML format and processed by MAPS software

(version 1.0). The preprocessing results generated a data matrix that consisted of the retention time (RT), mass-to-charge ratio (m/z) values, and peak intensity from which the fecal metabolites were identified. The in-house MS2 database was used for metabolite identification. OPLS-DA was carried out with SIMCA software (V15.0.2, Sartorius Stedim Data Analytics AB, Umea, Sweden). Differentially abundant metabolites between the healthy subject (HC) group and the RA group were obtained by selection according to the variable importance in the projection (VIP) score and the p value from analysis by Student's t-test. The metabolites were identified according to the accurate molecular weight and fragment pattern by the in-house MS2 database and by comparison to the following online databases: the Human Metabolome Database (HMDB; <http://www.hmdb.ca/>) and PubChem (<https://pubchem.ncbi.nlm.nih.gov/>).

## AUTHOR CONTRIBUTIONS

Chen YM: Data analysis and writing. Ma CY: Data analysis and data visualization. Liu LX and He JQ: Software and data visualization. Zhu CX and Zheng FP: Fecal samples collection. Dai WE and Hong XP: Writing (review and editing). Liu DZ and Tang DE: Supervision and funding acquisition. Dai Y: Funding acquisition and editing. All authors contributed to the article and approved the submitted version.

## ACKNOWLEDGMENTS

We thank Shanghai Biotree Biotechnology Ltd., for the assistance in 16S rRNA sequence and metabolomics data analysis.

## CONFLICTS OF INTEREST

The authors have nothing to disclose.

## FUNDING

This project was supported by the National Natural Science Foundation of China (Grant No. 81671596), the Science and Technology Planning Project of Guangdong Province, China (No. 2017B020209001), the National Science Foundation for Young Scientists of China (Grant No. 31700795), the Key Research and Development Program of Guangdong Province (Grant No. 2019B020229001), Sanming project of medicine in Shenzhen, the group of Rheumatology and Immunology led by Xiaofeng Zeng of Peking Union medical college Hospital and Dongzhou Liu in Shenzhen People's Hospital (SYJY201704 and SYJY201705).

## Editorial note

&This corresponding author has a verified history of publications using a personal email address for correspondence.

## REFERENCES

1. de Oliveira GL, Leite AZ, Higuchi BS, Gonzaga MI, Mariano VS. Intestinal dysbiosis and probiotic applications in autoimmune diseases. *Immunology*. 2017; 152:1–12. <https://doi.org/10.1111/imm.12765> PMID:28556916
2. GBD 2015 Disease and Injury Incidence and Prevalence Collaborators. Global, regional, and national incidence, prevalence, and years lived with disability for 310 diseases and injuries, 1990-2015: a systematic analysis for the Global Burden of Disease Study 2015. *Lancet*. 2016; 388:1545–602. [https://doi.org/10.1016/S0140-6736\(16\)31678-6](https://doi.org/10.1016/S0140-6736(16)31678-6) PMID:27733282
3. Xiang YJ, Dai SM. Prevalence of rheumatic diseases and disability in China. *Rheumatol Int*. 2009; 29:481–90. <https://doi.org/10.1007/s00296-008-0809-z> PMID:19066899
4. Chen J, Wright K, Davis JM, Jeraldo P, Marietta EV, Murray J, Nelson H, Matteson EL, Taneja V. An expansion of rare lineage intestinal microbes characterizes rheumatoid arthritis. *Genome Med*. 2016; 8:43. <https://doi.org/10.1186/s13073-016-0299-7> PMID:27102666
5. Smith PM, Howitt MR, Panikov N, Michaud M, Gallini CA, Bohlooly-Y M, Glickman JN, Garrett WS. The microbial metabolites, short-chain fatty acids, regulate colonic Treg cell homeostasis. *Science*. 2013; 341:569–73. <https://doi.org/10.1126/science.1241165> PMID:23828891
6. Zhong D, Wu C, Zeng X, Wang Q. The role of gut microbiota in the pathogenesis of rheumatic diseases. *Clin Rheumatol*. 2018; 37:25–34. <https://doi.org/10.1007/s10067-017-3821-4> PMID:28914372
7. Zamani B, Golkar HR, Farshbaf S, Emadi-Baygi M, Tajabadi-Ebrahimi M, Jafari P, Akhavan R, Taghizadeh M, Memarzadeh MR, Asemi Z. Clinical and metabolic response to probiotic supplementation in patients with rheumatoid arthritis: a randomized, double-blind, placebo-controlled trial. *Int J Rheum Dis*. 2016; 19:869–79. <https://doi.org/10.1111/1756-185X.12888> PMID:27135916
8. Lee YH. Causal association of gut microbiome on the risk of rheumatoid arthritis: a Mendelian randomisation study. *Ann Rheum Dis*. 2020. [Epub ahead of print]. <https://doi.org/10.1136/annrheumdis-2019-216747> PMID:31924601
9. Inamo J. Non-causal association of gut microbiome on the risk of rheumatoid arthritis: a Mendelian randomisation study. *Ann Rheum Dis*. 2021; 80:e103. <https://doi.org/10.1136/annrheumdis-2019-216565> PMID:31744823
10. Kishikawa T, Maeda Y, Nii T, Motooka D, Matsumoto Y, Matsushita M, Matsuoka H, Yoshimura M, Kawada S, Teshigawara S, Oguro E, Okita Y, Kawamoto K, et al. Metagenome-wide association study of gut microbiome revealed novel aetiology of rheumatoid arthritis in the Japanese population. *Ann Rheum Dis*. 2020; 79:103–11. <https://doi.org/10.1136/annrheumdis-2019-215743> PMID:31699813
11. Scher JU, Sczesnak A, Longman RS, Segata N, Ubeda C, Bielski C, Rostron T, Cerundolo V, Pamer EG, Abramson SB, Huttenhower C, Littman DR. Expansion of intestinal *Prevotella copri* correlates with enhanced susceptibility to arthritis. *Elife*. 2013; 2:e01202. <https://doi.org/10.7554/eLife.01202> PMID:24192039
12. Cardoso RS, Messori MR, Silva PH, Oliveira LF, Leite-Panissi C, Salvador S, Casarin R, Novaes AB Jr, Palioto DB, Furlaneto FA. Effects of *Bifidobacterium animalis* subsp. *lactis* HN019 on ligature-induced periodontitis in rats with experimental rheumatoid arthritis. *Benef Microbes*. 2020; 11:33–46. <https://doi.org/10.3920/BM2019.0038> PMID:32066256
13. Montgomery AB, Kopec J, Shrestha L, Thezenas ML, Burgess-Brown NA, Fischer R, Yue WW, Venables PJ. Crystal structure of *Porphyromonas gingivalis* peptidylarginine deiminase: implications for autoimmunity in rheumatoid arthritis. *Ann Rheum Dis*. 2016; 75:1255–61. <https://doi.org/10.1136/annrheumdis-2015-207656> PMID:26209657
14. Maeda Y, Kurakawa T, Umemoto E, Motooka D, Ito Y, Gotoh K, Hirota K, Matsushita M, Furuta Y, Narazaki M, Sakaguchi N, Kayama H, Nakamura S, et al. Dysbiosis Contributes to Arthritis Development via Activation of Autoreactive T Cells in the Intestine. *Arthritis Rheumatol*. 2016; 68:2646–61. <https://doi.org/10.1002/art.39783> PMID:27333153
15. Ivanov II, Atarashi K, Manel N, Brodie EL, Shima T, Karaoz U, Wei D, Goldfarb KC, Santee CA, Lynch SV, Tanoue T, Imaoka A, Itoh K, et al. Induction of intestinal Th17 cells by segmented filamentous bacteria. *Cell*.

- 2009; 139:485–98.  
<https://doi.org/10.1016/j.cell.2009.09.033>  
PMID:[19836068](https://pubmed.ncbi.nlm.nih.gov/19836068/)
16. Segata N, Izard J, Waldron L, Gevers D, Miropolsky L, Garrett WS, Huttenhower C. Metagenomic biomarker discovery and explanation. *Genome Biol.* 2011; 12:R60.  
<https://doi.org/10.1186/gb-2011-12-6-r60>  
PMID:[21702898](https://pubmed.ncbi.nlm.nih.gov/21702898/)
17. Maeda Y, Kumanogoh A, Takeda K. [Altered composition of gut microbiota in rheumatoid arthritis patients]. *Nihon Rinsho Meneki Gakkai Kaishi.* 2016; 39:59–63.  
<https://doi.org/10.2177/jsci.39.59> PMID:[27181236](https://pubmed.ncbi.nlm.nih.gov/27181236/)
18. Picchianti Diamanti A, Panebianco C, Salerno G, Di Rosa R, Salemi S, Sorgi ML, Meneguzzi G, Mariani MB, Rai A, Iacono D, Sesti G, Paziienza V, Laganà B. Impact of Mediterranean Diet on Disease Activity and Gut Microbiota Composition of Rheumatoid Arthritis Patients. *Microorganisms.* 2020; 8:1989.  
<https://doi.org/10.3390/microorganisms8121989>  
PMID:[33327432](https://pubmed.ncbi.nlm.nih.gov/33327432/)
19. Sun Y, Chen Q, Lin P, Xu R, He D, Ji W, Bian Y, Shen Y, Li Q, Liu C, Dong K, Tang YW, Pei Z, et al. Characteristics of Gut Microbiota in Patients With Rheumatoid Arthritis in Shanghai, China. *Front Cell Infect Microbiol.* 2019; 9:369.  
<https://doi.org/10.3389/fcimb.2019.00369>  
PMID:[31709198](https://pubmed.ncbi.nlm.nih.gov/31709198/)
20. Schroeder BO, Bäckhed F. Signals from the gut microbiota to distant organs in physiology and disease. *Nat Med.* 2016; 22:1079–89.  
<https://doi.org/10.1038/nm.4185> PMID:[27711063](https://pubmed.ncbi.nlm.nih.gov/27711063/)
21. Vaghef-Mehrabany E, Alipour B, Homayouni-Rad A, Sharif SK, Asghari-Jafarabadi M, Zavvari S. Probiotic supplementation improves inflammatory status in patients with rheumatoid arthritis. *Nutrition.* 2014; 30:430–35.  
<https://doi.org/10.1016/j.nut.2013.09.007>  
PMID:[24355439](https://pubmed.ncbi.nlm.nih.gov/24355439/)
22. Zhang X, Zhang D, Jia H, Feng Q, Wang D, Liang D, Wu X, Li J, Tang L, Li Y, Lan Z, Chen B, Li Y, et al. The oral and gut microbiomes are perturbed in rheumatoid arthritis and partly normalized after treatment. *Nat Med.* 2015; 21:895–905.  
<https://doi.org/10.1038/nm.3914> PMID:[26214836](https://pubmed.ncbi.nlm.nih.gov/26214836/)
23. Liu X, Zou Q, Zeng B, Fang Y, Wei H. Analysis of fecal Lactobacillus community structure in patients with early rheumatoid arthritis. *Curr Microbiol.* 2013; 67:170–76.  
<https://doi.org/10.1007/s00284-013-0338-1>  
PMID:[23483307](https://pubmed.ncbi.nlm.nih.gov/23483307/)
24. Alpizar-Rodriguez D, Lesker TR, Gronow A, Gilbert B, Raemy E, Lamacchia C, Gabay C, Finckh A, Strowig T. Prevotella copri in individuals at risk for rheumatoid arthritis. *Ann Rheum Dis.* 2019; 78:590–93.  
<https://doi.org/10.1136/annrheumdis-2018-214514>  
PMID:[30760471](https://pubmed.ncbi.nlm.nih.gov/30760471/)
25. Jeong Y, Kim JW, You HJ, Park SJ, Lee J, Ju JH, Park MS, Jin H, Cho ML, Kwon B, Park SH, Ji GE. Gut Microbial Composition and Function Are Altered in Patients with Early Rheumatoid Arthritis. *J Clin Med.* 2019; 8:693.  
<https://doi.org/10.3390/jcm8050693>  
PMID:[31100891](https://pubmed.ncbi.nlm.nih.gov/31100891/)
26. Chiang HI, Li JR, Liu CC, Liu PY, Chen HH, Chen YM, Lan JL, Chen DY. An Association of Gut Microbiota with Different Phenotypes in Chinese Patients with Rheumatoid Arthritis. *J Clin Med.* 2019; 8:1770.  
<https://doi.org/10.3390/jcm8111770>  
PMID:[31652955](https://pubmed.ncbi.nlm.nih.gov/31652955/)
27. Picchianti-Diamanti A, Panebianco C, Salemi S, Sorgi ML, Di Rosa R, Tropea A, Sgrulletti M, Salerno G, Terracciano F, D’Amelio R, Laganà B, Paziienza V. Analysis of Gut Microbiota in Rheumatoid Arthritis Patients: Disease-Related Dysbiosis and Modifications Induced by Etanercept. *Int J Mol Sci.* 2018; 19:2938.  
<https://doi.org/10.3390/ijms19102938>  
PMID:[30261687](https://pubmed.ncbi.nlm.nih.gov/30261687/)
28. Zhou J, Chen J, Hu C, Xie Z, Li H, Wei S, Wang D, Wen C, Xu G. Exploration of the serum metabolite signature in patients with rheumatoid arthritis using gas chromatography-mass spectrometry. *J Pharm Biomed Anal.* 2016; 127:60–67.  
<https://doi.org/10.1016/j.jpba.2016.02.004>  
PMID:[26879423](https://pubmed.ncbi.nlm.nih.gov/26879423/)
29. Bahadori B, Uitz E, Thonhofer R, Trummer M, Pestemer-Lach I, McCarty M, Krejs GJ. omega-3 Fatty acids infusions as adjuvant therapy in rheumatoid arthritis. *JPEN J Parenter Enteral Nutr.* 2010; 34:151–55.  
<https://doi.org/10.1177/0148607109342130>  
PMID:[20375422](https://pubmed.ncbi.nlm.nih.gov/20375422/)
30. Häger J, Bang H, Hagen M, Frech M, Träger P, Sokolova MV, Steffen U, Tascilar K, Sarter K, Schett G, Rech J, Zaiss MM. The Role of Dietary Fiber in Rheumatoid Arthritis Patients: A Feasibility Study. *Nutrients.* 2019; 11:2392.  
<https://doi.org/10.3390/nu11102392>  
PMID:[31591345](https://pubmed.ncbi.nlm.nih.gov/31591345/)
31. He J, Chan T, Hong X, Zheng F, Zhu C, Yin L, Dai W, Tang D, Liu D, Dai Y. Microbiome and Metabolome Analyses Reveal the Disruption of Lipid Metabolism in Systemic Lupus Erythematosus. *Front Immunol.* 2020; 11:1703.  
<https://doi.org/10.3389/fimmu.2020.01703>  
PMID:[32849599](https://pubmed.ncbi.nlm.nih.gov/32849599/)

## SUPPLEMENTARY MATERIALS

### Supplementary Figures

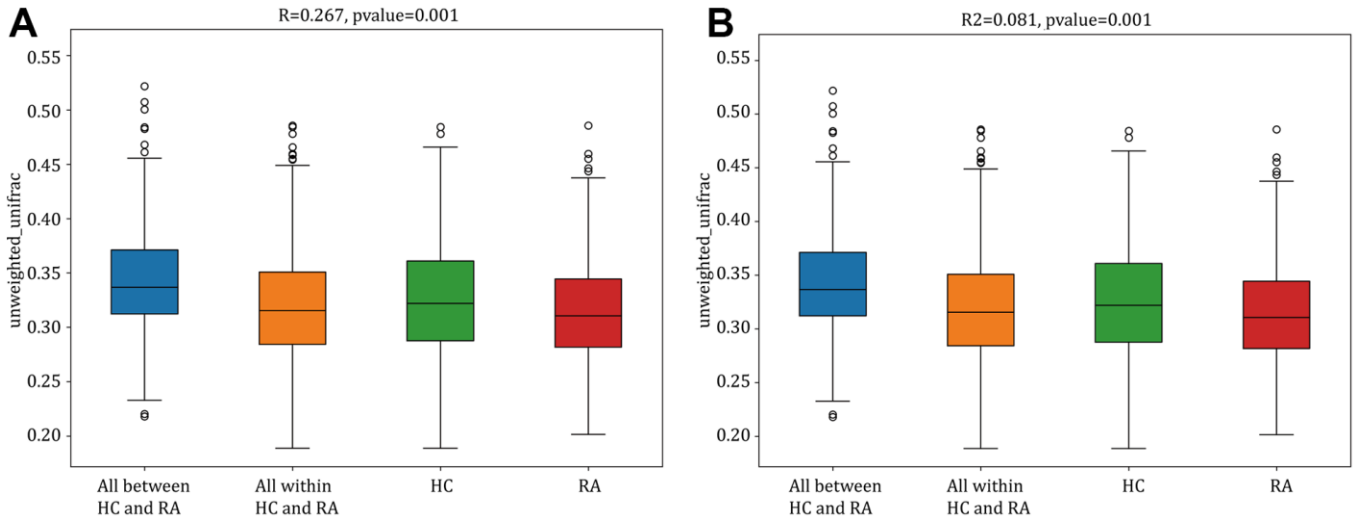

**Supplementary Figure 1.  $\beta$ -diversity analysis showed that there was a significant difference between HC and RA group. (A) PERMANOVA analysis ( $p = 0.001$ ), (B) ANOSIM analysis ( $p = 0.001$ ).**

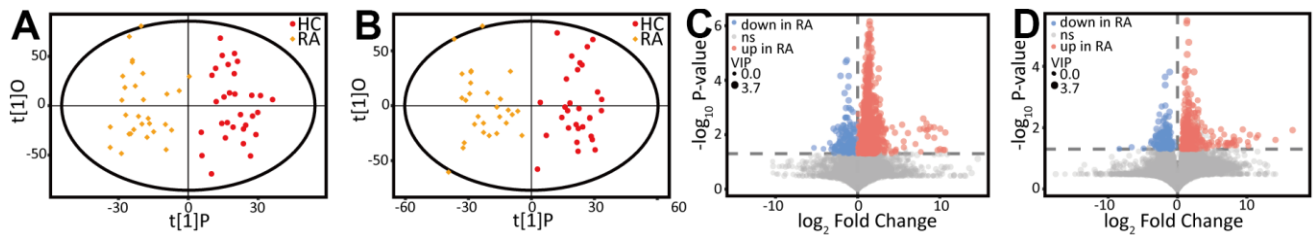

**Supplementary Figure 2. OPLS-DA score plots of fecal samples. (A) Negative ion mode, and positive ion mode (B), one dot represents one sample. Volcano plot of fecal samples. (C) Negative ion mode and (D) positive ion mode. Red dots represent significantly up-regulated in RA group, blue dots represent significantly down-regulated in RA group, one dot represents one differential metabolite.**

## **Supplementary Table**

Please browse Full Text version to see the data of Supplementary Table 1A–1G.

**Supplementary Table 1A. Total bacterial genera.**

**Supplementary Table 1B. The significant difference genera between HC and RA group.**

**Supplementary Table 1C. The genera that less abundance in RA group.**

**Supplementary Table 1D. The genera that more abundance in RA group.**

**Supplementary Table 1E. The genera abundance in every sample.**

**Supplementary Table 1F. The metabolites in the NEG that we detected.**

**Supplementary Table 1G. The metabolites in the POS that we detected.**
