# Supplementary material for: Analysis of gut microbiota and metabolites in patients with rheumatoid arthritis and identification of potential biomarkers
Source: Aging (Albany NY). 2021 Oct 20;13(20):23689–701. doi: 10.18632/aging.203641 (PMC8580343; doi:10.18632/aging.203641)
Supplement: Supplementary Table 1A [file aging-13-203641-s002.xls]

## Sheet: A-Total bacterial genera
Supplementary Table 1A. Total bacterial genera.
Genus	HC(Mean)	HC(Sd)	RA(Mean)	RA(Sd)	HC::RA(p)	HC::RA(p-corrected)	fc(ra/hc)	logFC
Abiotrophia	2.77706e-06	8.85803e-06	1.47169e-05	5.86479e-05	0.313507	0.395616	5.29947	2.40585
Acidaminococcus	6.50787e-07	3.56451e-06	6.34355e-05	0.000223522	0.136573	0.258514	97.475	6.60696
Acinetobacter	1.16531e-05	1.9695e-05	0.00341245	0.0178121	3.42464e-08	2.72259e-06	292.836	8.19395
Actinomyces	0.000349933	0.000587406	0.000434243	0.000477381	0.0399331	0.104088	1.24093	0.311422
Adlercreutzia	0.000320624	0.000453544	0.000959926	0.00274811	0.365434	0.433612	2.99393	1.58204
Aeromonas	5.10307e-05	5.26196e-05	7.29461e-05	7.40159e-05	0.227836	0.329326	1.42946	0.515466
Agathobacter	0.0493334	0.0594093	0.0312525	0.0385463	0.171661	0.281382	0.633496	-0.658593
Akkermansia	0.0119822	0.0389627	0.0457651	0.119349	0.00151327	0.00925421	3.81941	1.93335
Alistipes	0.0112238	0.0177752	0.0174944	0.0262595	0.153052	0.264513	1.55869	0.64033
Allisonella	0.000233463	0.000436601	3.60376e-05	0.000105646	0.0555115	0.137911	0.154361	-2.69562
Alloprevotella	0.00197124	0.00674184	0.00118666	0.00570752	0.000623604	0.00521858	0.601988	-0.732193
Anaerostipes	0.00590687	0.00895697	0.0109383	0.0172409	0.183492	0.291752	1.8518	0.888926
Anaerotruncus	7.67615e-06	1.42466e-05	0.000179501	0.0004395	0.0301445	0.0840874	23.3842	4.54746
Atopobium	4.42611e-05	0.000161495	4.25777e-05	6.0966e-05	0.00420169	0.0215506	0.961967	-0.0559401
Bacteroides	0.11281	0.109825	0.0993085	0.0881576	0.372219	0.428861	0.880318	-0.183904
Barnesiella	0.000973576	0.00316136	0.0021383	0.00633849	0.278728	0.372418	2.19634	1.1351
Bifidobacterium	0.0461244	0.0806208	0.0420575	0.0577842	0.195819	0.299377	0.911829	-0.133164
Bilophila	0.00101742	0.00226364	0.000796926	0.00126606	0.436645	0.475525	0.783281	-0.352398
Blautia	0.045644	0.0390431	0.06848	0.0555247	0.0147873	0.0522485	1.50031	0.585258
Butyricicoccus	0.0048823	0.00608064	0.00533864	0.0111374	0.145997	0.260827	1.09347	0.12891
Butyricimonas	0.000407418	0.000767455	0.000471669	0.00151118	0.131132	0.251205	1.1577	0.211267
CAG-352	0.000559109	0.00264729	1.20544e-06	4.50999e-06	0.0293624	0.0833684	0.002156	-8.85743
CAG-56	0.00346635	0.00415476	0.00347974	0.00522449	0.254773	0.352251	1.00386	0.0055603
Candidatus_Soleaferrea	5.41093e-05	0.00013524	4.5247e-05	5.77339e-05	0.313247	0.39845	0.836215	-0.258054
Candidatus_Stoquefichus	1.16684e-05	4.47432e-05	0.000351	0.00180206	0.225459	0.328881	30.0812	4.91079
Catabacter	2.2352e-05	4.30183e-05	0.000159714	0.000583021	0.0231432	0.0721522	7.14542	2.83702
Catenibacterium	0.00409143	0.0176012	0.00202534	0.0102973	3.25126e-05	0.000738501	0.495021	-1.01444
Christensenellaceae_R-7_group	0.00665076	0.0148385	0.00368455	0.0111889	0.0737095	0.180305	0.554004	-0.852032
Citrobacter	0.0017551	0.00367748	0.00130751	0.00298385	0.469781	0.49467	0.744973	-0.42474
Clostridioides	0	0	3.27431e-06	8.49463e-06	0.0192294	0.0623976	#DIV/0!	#DIV/0!
Clostridium_sensu_stricto_1	0.00567079	0.00898312	0.0142365	0.0334385	0.496976	0.500121	2.51049	1.32797
Collinsella	0.0164997	0.0274281	0.0180991	0.0265076	0.436755	0.472409	1.09693	0.133473
Coprobacillus	1.61584e-05	3.61684e-05	0.00021887	0.000835525	0.0950044	0.198759	13.5453	3.75972
Coprobacter	2.16828e-05	7.70475e-05	1.62724e-06	8.76293e-06	0.152383	0.269209	0.0750472	-3.73606
Coprococcus_1	0.00108691	0.00091273	0.000980184	0.00154696	0.0872148	0.195312	0.901812	-0.149102
Coprococcus_2	0.00755797	0.0134646	0.000889847	0.00214262	0.00124444	0.00860286	0.117736	-3.08637
Coprococcus_3	0.000232989	0.000542682	0.000115077	0.000326704	0.130827	0.253676	0.493918	-1.01766
Corynebacterium	1.15623e-05	2.79269e-05	2.24684e-05	3.1979e-05	0.0290469	0.083972	1.94324	0.958464
DTU089	2.07193e-05	9.26564e-05	0.000282867	0.000922059	0.00108761	0.00786042	13.6523	3.77108
Desulfovibrio	0.00145311	0.002773	0.00245546	0.00527883	0.0746704	0.179888	1.68979	0.756847
Dialister	0.0198196	0.0489362	0.00729427	0.0169268	0.442735	0.472449	0.368034	-1.44209
Dorea	0.00900877	0.00773479	0.00492331	0.00462384	0.00604846	0.026714	0.546502	-0.871702
Eggerthella	0.000515942	0.00114961	0.00322052	0.00684728	0.000300884	0.00318937	6.24202	2.64201
Eisenbergiella	2.2379e-05	2.83077e-05	0.000541722	0.00127588	0.000132625	0.00162211	24.2067	4.59733
Enorma	6.15017e-07	3.36859e-06	0.00118583	0.00414967	0.000400365	0.00397863	1928.12	10.913
Enterobacter	0.00207959	0.00706834	0.00499442	0.0158925	0.26424	0.356052	2.40164	1.26402
Enterococcus	0.000268185	0.000209645	0.00296786	0.0105808	2.42318e-06	9.63213e-05	11.0665	3.46812
Erysipelatoclostridium	0.000545851	0.00175215	0.00526571	0.0238504	0.000568133	0.00501851	9.64678	3.27005
Erysipelotrichaceae_UCG-003	0.0126825	0.0172095	0.0145758	0.033001	0.0247889	0.0743667	1.14929	0.200739
Escherichia-Shigella	0.0547681	0.0939068	0.0839528	0.127078	0.279699	0.370601	1.53288	0.616243
Eubacterium	8.57021e-06	1.43867e-05	0.00105918	0.00495336	0.000423833	0.00396409	123.589	6.9494
Faecalibacterium	0.153144	0.0968548	0.0977129	0.0785804	0.0142294	0.0514199	0.638046	-0.648267
Faecalitalea	0.000310898	0.000642271	0.000699448	0.00220138	0.471961	0.493696	2.24977	1.16978
Family_XIII_AD3011_group	8.34769e-05	9.71651e-05	0.000408476	0.001645	0.360091	0.437057	4.89328	2.2908
Flavonifractor	0.000316999	0.000773054	0.00181379	0.00350773	0.00067077	0.00533262	5.72175	2.51646
Fournierella	1.3142e-06	5.0182e-06	2.58383e-05	0.000121137	0.166449	0.275681	19.6609	4.29726
Fusobacterium	0.00889743	0.0252699	0.00559604	0.0290723	0.0905033	0.19446	0.62895	-0.668983
GCA-900066575	6.04706e-05	0.000123591	3.3959e-05	5.95392e-05	0.096784	0.199853	0.561579	-0.832439
GCA-900066755	0.000331849	0.000525974	0.000277243	0.000569443	0.371391	0.431031	0.835449	-0.259376
Gemella	4.94227e-05	0.000139675	5.7209e-05	0.000120201	0.186418	0.290592	1.15755	0.211068
Gordonibacter	3.08108e-05	4.65342e-05	7.69559e-05	0.000132148	0.258598	0.354458	2.49769	1.3206
Granulicatella	8.89576e-05	0.000167942	0.000122626	0.000187925	0.220927	0.328294	1.37848	0.463077
Haemophilus	0.000570239	0.0013642	0.00179711	0.00508349	0.054274	0.136977	3.15151	1.65604
Holdemanella	0.0107133	0.0193685	0.0105707	0.028057	0.244872	0.341531	0.986693	-0.0193264
Holdemania	5.91166e-05	6.99067e-05	0.000282573	0.000623377	0.223738	0.329392	4.77994	2.25699
Hungatella	0.000141629	0.00031111	0.000380925	0.000618332	0.0384074	0.10178	2.6896	1.42739
Intestinimonas	1.43228e-05	4.47187e-05	7.64087e-05	0.000227509	0.0246684	0.0754284	5.33474	2.41542
Klebsiella	0.0126475	0.0412062	0.0251578	0.0726847	0.305753	0.395241	1.98916	0.992156
Lachnoclostridium	0.0194127	0.0198737	0.0134575	0.0117047	0.160329	0.271194	0.693229	-0.528595
Lachnospira	0.00366166	0.010134	0.00224833	0.00598937	0.00564901	0.027218	0.614018	-0.703648
Lachnospiraceae_FCS020_group	0.000524657	0.000469266	0.000585034	0.000646327	0.478788	0.497564	1.11508	0.157145
Lachnospiraceae_FE2018_group	0.00010771	0.000166894	0.00037899	0.000684664	0.00569379	0.0266268	3.51863	1.81501
Lachnospiraceae_NC2004_group	0.000127287	0.000249504	6.22117e-05	0.000160887	0.242751	0.341571	0.488753	-1.03282
Lachnospiraceae_ND3007_group	0.00110044	0.0015255	0.00140635	0.0056657	0.010462	0.0396062	1.27798	0.353867
Lachnospiraceae_NK4A136_group	0.00361922	0.00656768	0.0024863	0.00513625	0.0374129	0.100825	0.68697	-0.541682
Lachnospiraceae_UCG-001	0.000275896	0.000804942	2.88629e-05	6.28888e-05	0.144611	0.261286	0.104615	-3.25684
Lachnospiraceae_UCG-004	0.000321978	0.000709316	0.000243088	0.000391507	0.204117	0.306176	0.754981	-0.405488
Lachnospiraceae_UCG-008	0.00108738	0.000960637	0.00106174	0.00113432	0.43078	0.475653	0.97642	-0.0344265
Lactobacillus	0.00559815	0.0219267	0.0232392	0.0600505	2.82853e-05	0.00074956	4.15123	2.05354
Lactococcus	1.05141e-05	2.76957e-05	9.02304e-06	2.23585e-05	0.433598	0.475463	0.858186	-0.220637
Marvinbryantia	0.000163738	0.000157555	0.000287183	0.000441121	0.354698	0.433823	1.75392	0.81058
Megamonas	0.0127185	0.0412055	0.00161457	0.00403286	0.152854	0.267074	0.126946	-2.97771
Megasphaera	5.95527e-06	1.86821e-05	0.00237094	0.00724507	2.26515e-05	0.000720318	398.124	8.63708
Merdibacter	0	0	3.87896e-05	0.000177832	0.0192294	0.0611496	#DIV/0!	#DIV/0!
Morganella	6.04917e-07	3.31327e-06	1.34913e-06	5.05015e-06	0.261998	0.356048	2.23027	1.15722
Negativibacillus	0.000738433	0.0034547	5.06974e-05	0.000175791	0.10197	0.207863	0.0686554	-3.86448
Nicotiana_otophora	7.09538e-05	0.000184255	0.00181899	0.00508309	2.63395e-09	4.18797e-07	25.6363	4.68012
Odoribacter	0.000142128	0.000202723	0.000274344	0.000848051	0.0319515	0.0875912	1.93026	0.948794
Olsenella	1.86093e-05	4.68056e-05	0.000415375	0.00172952	0.00770179	0.0322259	22.3208	4.48032
Oribacterium	1.51703e-05	3.55336e-05	3.05977e-05	0.000132125	0.488413	0.50427	2.01695	1.01218
Oscillibacter	0.000154861	0.000294852	0.000964414	0.00216594	0.0101794	0.0394763	6.22759	2.63867
Parabacteroides	0.00317614	0.00372438	0.0100193	0.012659	0.0803858	0.187961	3.15456	1.65744
Paraeggerthella	3.23537e-06	1.77208e-05	7.63541e-05	0.00041118	0.490355	0.503009	23.5998	4.56071
Paraprevotella	0.00106035	0.00243562	9.85314e-05	0.000258194	0.0065935	0.0283342	0.0929236	-3.42781
Parasutterella	0.000957674	0.00230748	0.000178162	0.000673863	0.00126128	0.00835597	0.186036	-2.42634
Parvimonas	2.79888e-05	5.6049e-05	7.15407e-06	1.27622e-05	0.180452	0.292773	0.255605	-1.96801
Peptococcus	1.88279e-06	5.80622e-06	0.000359571	0.00191953	0.182885	0.293725	190.978	7.57726
Peptostreptococcus	1.26602e-05	2.92897e-05	1.99968e-05	3.54317e-05	0.0937767	0.198807	1.5795	0.659469
Phascolarctobacterium	0.00714912	0.0111017	0.00775379	0.0125828	0.338347	0.417033	1.08458	0.117137
Prevotella	0.000281626	0.00147529	1.38116e-05	3.74547e-05	0.298675	0.389257	0.0490422	-4.34983
Prevotella_2	0.0130141	0.0423407	0.000473971	0.00123454	0.0185313	0.0613849	0.03642	-4.77913
Prevotella_9	0.073539	0.0951283	0.0217124	0.0691472	0.0781475	0.185454	0.29525	-1.75999
Pseudomonas	0	0	2.3453e-05	0.000102774	0.0096839	0.0384935	#DIV/0!	#DIV/0!
Pseudopropionibacterium	3.75044e-06	8.80028e-06	5.1096e-06	1.15708e-05	0.368909	0.431298	1.3624	0.446151
Pyramidobacter	2.78539e-05	0.000129715	0.00302584	0.0142179	0.00306322	0.0173947	108.633	6.76331
Raoultella	0.00304001	0.0151026	0.000533229	0.00141398	0.49089	0.50033	0.175404	-2.51125
Raoultibacter	9.87147e-06	2.05705e-05	0.000108188	0.000297743	0.0165709	0.0572775	10.9597	3.45413
Rhodococcus	1.95936e-05	3.72455e-05	1.44872e-05	2.56052e-05	0.394615	0.44817	0.739383	-0.435606
Robinsoniella	1.13382e-05	2.96302e-05	1.8904e-05	3.71721e-05	0.0858033	0.194896	1.66728	0.737499
Romboutsia	0.0156384	0.026508	0.0200117	0.0258859	0.4071	0.455838	1.27965	0.355749
Roseburia	0.0174945	0.0202393	0.0139866	0.0288622	0.0121753	0.0450204	0.799484	-0.322858
Rothia	0.000208055	0.000249314	0.00148885	0.00231528	3.67117e-05	0.000729645	7.15606	2.83917
Ruminiclostridium_5	0.00122266	0.00211494	0.00342726	0.00871577	0.0178661	0.0604406	2.80312	1.48704
Ruminiclostridium_6	5.37087e-05	0.000159721	2.78668e-05	0.000135589	0.142044	0.262616	0.518851	-0.946608
Ruminiclostridium_9	0.000269972	0.000493018	0.000232092	0.000379623	0.39686	0.447523	0.859689	-0.218114
Ruminococcaceae_NK4A214_group	0.00202245	0.00429058	0.00203719	0.00424919	0.326816	0.405967	1.00729	0.0104814
Ruminococcaceae_UCG-002	0.0113262	0.0240695	0.00671918	0.00936532	0.496976	0.496976	0.593242	-0.753308
Ruminococcaceae_UCG-003	0.000373145	0.000682107	0.000170792	0.000370229	0.0257095	0.0757002	0.457708	-1.1275
Ruminococcaceae_UCG-004	0.000360281	0.000512731	0.00096095	0.00158593	0.141106	0.263952	2.66722	1.41534
Ruminococcaceae_UCG-005	0.00553522	0.0230403	0.000906368	0.00164758	0.120203	0.238904	0.163746	-2.61047
Ruminococcaceae_UCG-013	0.00516142	0.0109101	0.0093665	0.0151399	0.297822	0.391352	1.81471	0.859741
Ruminococcaceae_UCG-014	0.0159973	0.034753	0.00710776	0.0234523	0.0053012	0.0263403	0.44431	-1.17036
Ruminococcus_1	0.00389808	0.00447187	0.00298223	0.00616237	0.163466	0.27359	0.76505	-0.386374
Ruminococcus_2	0.0198482	0.0434112	0.0103488	0.013568	0.366498	0.431653	0.521395	-0.939551
Scardovia	1.60187e-06	8.77381e-06	2.62134e-05	6.65109e-05	0.000736212	0.00557418	16.3643	4.03248
Sellimonas	2.04979e-05	2.49307e-05	0.00198862	0.00596811	2.55727e-07	1.35536e-05	97.0157	6.60015
Senegalimassilia	4.8282e-05	0.000181711	0.00126319	0.00405214	0.00603111	0.0273985	26.1627	4.70944
Slackia	0.00104712	0.00398626	4.17949e-05	0.00015372	0.121108	0.23773	0.0399142	-4.64695
Solobacterium	0.000107535	0.000218868	4.26147e-05	6.30431e-05	0.239	0.339294	0.396287	-1.33538
Staphylococcus	6.11681e-05	0.000147366	0.000146648	0.000554469	0.4957	0.502014	2.39746	1.26151
Stenotrophomonas	7.43915e-07	4.07459e-06	0.000333303	0.00176106	0.0025936	0.0152734	448.039	8.80748
Streptococcus	0.00774265	0.0147146	0.0361593	0.0523329	9.87232e-05	0.00130808	4.67014	2.22347
Subdoligranulum	0.0345086	0.0488853	0.0485749	0.0633947	0.316467	0.396207	1.40762	0.493256
Sutterella	0.00135642	0.00649335	0.000440271	0.00040984	7.67257e-05	0.00110903	0.324583	-1.62334
Terrisporobacter	0.000235219	0.000438271	0.00019974	0.000464588	0.11998	0.241478	0.849165	-0.235884
Turicibacter	0.00047715	0.000800787	0.00115638	0.00300072	0.412286	0.458415	2.42352	1.27711
Tyzzerella_3	0.000487638	0.000899827	0.00117735	0.00492578	0.361649	0.432347	2.41439	1.27166
Tyzzerella_4	0.000965624	0.00284114	0.00688179	0.0297777	0.00398036	0.0210959	7.12678	2.83325
UBA1819	0.000433927	0.00104338	0.00305282	0.0054365	4.43804e-05	0.000784054	7.03532	2.81462
Veillonella	0.000175191	0.000309071	0.001111	0.00187362	0.00349039	0.019137	6.34166	2.66486
Weissella	0.000152657	0.000506509	0.000599845	0.00205825	0.305955	0.392313	3.92937	1.9743
[Clostridium]_innocuum_group	0.00017456	0.000495262	0.000650768	0.00134738	0.000212716	0.00241584	3.72804	1.89842
[Eubacterium]_coprostanoligenes_group	0.0094884	0.0166414	0.010036	0.0139127	0.460747	0.488391	1.05772	0.0809532
[Eubacterium]_eligens_group	0.00224794	0.00518503	0.000540062	0.000746563	0.0835726	0.19258	0.240248	-2.05741
[Eubacterium]_hallii_group	0.00620311	0.0074607	0.00687473	0.00800938	0.436755	0.469217	1.10827	0.148312
[Eubacterium]_ruminantium_group	0.00453566	0.00923721	0.00192028	0.00432649	0.185509	0.292039	0.423374	-1.24
[Eubacterium]_ventriosum_group	0.000707784	0.000971624	0.00183116	0.00262442	0.0539186	0.138275	2.58717	1.37138
[Ruminococcus]_gauvreauii_group	0.00173802	0.00266913	0.000907673	0.0017521	0.00880923	0.0359145	0.522246	-0.937199
[Ruminococcus]_gnavus_group	0.00472238	0.00799736	0.00747395	0.0111736	0.089825	0.195646	1.58267	0.662357
[Ruminococcus]_torques_group	0.0215127	0.0263279	0.0200904	0.0248373	0.360806	0.434607	0.933882	-0.0986872
uncultured_bacterium_f_Coriobacteriales_Incertae_Sedis	8.60769e-05	0.000244047	0.000847647	0.00249965	0.238033	0.340966	9.84756	3.29977
uncultured_bacterium_f_Lachnospiraceae	0.00347	0.00375158	0.00596747	0.00833376	0.142553	0.260528	1.71973	0.782183
uncultured_bacterium_f_Muribaculaceae	0.00740585	0.020259	0.000184662	0.000915537	0.00138302	0.00879602	0.0249347	-5.3257
uncultured_bacterium_f_Peptostreptococcaceae	0.0011063	0.00209725	0.00514316	0.00864079	0.160293	0.27405	4.64896	2.21691
uncultured_bacterium_f_Prevotellaceae	0.00578569	0.0229633	3.5047e-06	1.88734e-05	6.54569e-05	0.00104076	0.000605753	-10.689
uncultured_bacterium_f_Ruminococcaceae	0.000721412	0.00124196	0.00127165	0.00256878	0.0884911	0.195418	1.76272	0.817807
uncultured_bacterium_f_Saccharimonadaceae	0.000610154	0.0015069	0.000322029	0.000478664	0.187424	0.289325	0.527783	-0.921983
uncultured_bacterium_o_Bacteroidales	5.73389e-05	0.000309828	3.49727e-05	0.000151526	0.196919	0.298192	0.60993	-0.713285
uncultured_bacterium_o_Mollicutes_RF39	0.000319567	0.00061738	0.00153852	0.00566032	0.372408	0.425992	4.8144	2.26736
