# Supplementary material for: Analysis of gut microbiota and metabolites in patients with rheumatoid arthritis and identification of potential biomarkers
Source: Aging (Albany NY). 2021 Oct 20;13(20):23689–701. doi: 10.18632/aging.203641 (PMC8580343; doi:10.18632/aging.203641)
Supplement: Supplementary Table 1B [file aging-13-203641-s003.xls]

## Sheet: B-significant diff-genera 
Supplementary Table 1B. The significant difference genera between HC and RA group.
Genus	HC(Mean)	HC(Sd)	RA(Mean)	RA(Sd)	HC::RA(p)	HC::RA(p-corrected)	fc(ra/hc)	logFC
Acinetobacter	1.16531e-05	1.9695e-05	0.00341245	0.0178121	3.42464e-08	2.72259e-06	292.836	8.19395
Akkermansia	0.0119822	0.0389627	0.0457651	0.119349	0.00151327	0.00925421	3.81941	1.93335
Alloprevotella	0.00197124	0.00674184	0.00118666	0.00570752	0.000623604	0.00521858	0.601988	-0.732193
Atopobium	4.42611e-05	0.000161495	4.25777e-05	6.0966e-05	0.00420169	0.0215506	0.961967	-0.0559401
Catenibacterium	0.00409143	0.0176012	0.00202534	0.0102973	3.25126e-05	0.000738501	0.495021	-1.01444
Coprococcus_2	0.00755797	0.0134646	0.000889847	0.00214262	0.00124444	0.00860286	0.117736	-3.08637
DTU089	2.07193e-05	9.26564e-05	0.000282867	0.000922059	0.00108761	0.00786042	13.6523	3.77108
Dorea	0.00900877	0.00773479	0.00492331	0.00462384	0.00604846	0.026714	0.546502	-0.871702
Eggerthella	0.000515942	0.00114961	0.00322052	0.00684728	0.000300884	0.00318937	6.24202	2.64201
Eisenbergiella	2.2379e-05	2.83077e-05	0.000541722	0.00127588	0.000132625	0.00162211	24.2067	4.59733
Enorma	6.15017e-07	3.36859e-06	0.00118583	0.00414967	0.000400365	0.00397863	1928.12	10.913
Enterococcus	0.000268185	0.000209645	0.00296786	0.0105808	2.42318e-06	9.63213e-05	11.0665	3.46812
Erysipelatoclostridium	0.000545851	0.00175215	0.00526571	0.0238504	0.000568133	0.00501851	9.64678	3.27005
Eubacterium	8.57021e-06	1.43867e-05	0.00105918	0.00495336	0.000423833	0.00396409	123.589	6.9494
Flavonifractor	0.000316999	0.000773054	0.00181379	0.00350773	0.00067077	0.00533262	5.72175	2.51646
Lachnospira	0.00366166	0.010134	0.00224833	0.00598937	0.00564901	0.027218	0.614018	-0.703648
Lachnospiraceae_FE2018_group	0.00010771	0.000166894	0.00037899	0.000684664	0.00569379	0.0266268	3.51863	1.81501
Lachnospiraceae_ND3007_group	0.00110044	0.0015255	0.00140635	0.0056657	0.010462	0.0396062	1.27798	0.353867
Lactobacillus	0.00559815	0.0219267	0.0232392	0.0600505	2.82853e-05	0.00074956	4.15123	2.05354
Megasphaera	5.95527e-06	1.86821e-05	0.00237094	0.00724507	2.26515e-05	0.000720318	398.124	8.63708
Nicotiana_otophora	7.09538e-05	0.000184255	0.00181899	0.00508309	2.63395e-09	4.18797e-07	25.6363	4.68012
Olsenella	1.86093e-05	4.68056e-05	0.000415375	0.00172952	0.00770179	0.0322259	22.3208	4.48032
Oscillibacter	0.000154861	0.000294852	0.000964414	0.00216594	0.0101794	0.0394763	6.22759	2.63867
Paraprevotella	0.00106035	0.00243562	9.85314e-05	0.000258194	0.0065935	0.0283342	0.0929236	-3.42781
Parasutterella	0.000957674	0.00230748	0.000178162	0.000673863	0.00126128	0.00835597	0.186036	-2.42634
Pseudomonas	0	0	2.3453e-05	0.000102774	0.0096839	0.0384935	#DIV/0!	#DIV/0!
Pyramidobacter	2.78539e-05	0.000129715	0.00302584	0.0142179	0.00306322	0.0173947	108.633	6.76331
Roseburia	0.0174945	0.0202393	0.0139866	0.0288622	0.0121753	0.0450204	0.799484	-0.322858
Rothia	0.000208055	0.000249314	0.00148885	0.00231528	3.67117e-05	0.000729645	7.15606	2.83917
Ruminococcaceae_UCG-014	0.0159973	0.034753	0.00710776	0.0234523	0.0053012	0.0263403	0.44431	-1.17036
Scardovia	1.60187e-06	8.77381e-06	2.62134e-05	6.65109e-05	0.000736212	0.00557418	16.3643	4.03248
Sellimonas	2.04979e-05	2.49307e-05	0.00198862	0.00596811	2.55727e-07	1.35536e-05	97.0157	6.60015
Senegalimassilia	4.8282e-05	0.000181711	0.00126319	0.00405214	0.00603111	0.0273985	26.1627	4.70944
Stenotrophomonas	7.43915e-07	4.07459e-06	0.000333303	0.00176106	0.0025936	0.0152734	448.039	8.80748
Streptococcus	0.00774265	0.0147146	0.0361593	0.0523329	9.87232e-05	0.00130808	4.67014	2.22347
Sutterella	0.00135642	0.00649335	0.000440271	0.00040984	7.67257e-05	0.00110903	0.324583	-1.62334
Tyzzerella_4	0.000965624	0.00284114	0.00688179	0.0297777	0.00398036	0.0210959	7.12678	2.83325
UBA1819	0.000433927	0.00104338	0.00305282	0.0054365	4.43804e-05	0.000784054	7.03532	2.81462
Veillonella	0.000175191	0.000309071	0.001111	0.00187362	0.00349039	0.019137	6.34166	2.66486
[Clostridium]_innocuum_group	0.00017456	0.000495262	0.000650768	0.00134738	0.000212716	0.00241584	3.72804	1.89842
[Ruminococcus]_gauvreauii_group	0.00173802	0.00266913	0.000907673	0.0017521	0.00880923	0.0359145	0.522246	-0.937199
uncultured_bacterium_f_Muribaculaceae	0.00740585	0.020259	0.000184662	0.000915537	0.00138302	0.00879602	0.0249347	-5.3257
uncultured_bacterium_f_Prevotellaceae	0.00578569	0.0229633	3.5047e-06	1.88734e-05	6.54569e-05	0.00104076	0.000605753	-10.689
