# Supplementary material for: Analysis of gut microbiota and metabolites in patients with rheumatoid arthritis and identification of potential biomarkers
Source: Aging (Albany NY). 2021 Oct 20;13(20):23689–701. doi: 10.18632/aging.203641 (PMC8580343; doi:10.18632/aging.203641)
Supplement: Supplementary Table 1C [file aging-13-203641-s004.xls]

## Sheet: C-genera less abundant in RA
Supplementary Table 1C. The genera that less abundance in RA group.
Genus	HC(Mean)	HC(Sd)	RA(Mean)	RA(Sd)	HC::RA(p)	HC::RA(p-corrected)	fc(ra/hc)	logFC
Agathobacter	0.0493334	0.0594093	0.0312525	0.0385463	0.171661	0.281382	0.633496	-0.658593
Allisonella	0.000233463	0.000436601	3.60376e-05	0.000105646	0.0555115	0.137911	0.154361	-2.69562
Alloprevotella	0.00197124	0.00674184	0.00118666	0.00570752	0.000623604	0.00521858	0.601988	-0.732193
Atopobium	4.42611e-05	0.000161495	4.25777e-05	6.0966e-05	0.00420169	0.0215506	0.961967	-0.0559401
Bacteroides	0.11281	0.109825	0.0993085	0.0881576	0.372219	0.428861	0.880318	-0.183904
Bifidobacterium	0.0461244	0.0806208	0.0420575	0.0577842	0.195819	0.299377	0.911829	-0.133164
Bilophila	0.00101742	0.00226364	0.000796926	0.00126606	0.436645	0.475525	0.783281	-0.352398
CAG-352	0.000559109	0.00264729	1.20544e-06	4.50999e-06	0.0293624	0.0833684	0.002156	-8.85743
Candidatus_Soleaferrea	5.41093e-05	0.00013524	4.5247e-05	5.77339e-05	0.313247	0.39845	0.836215	-0.258054
Catenibacterium	0.00409143	0.0176012	0.00202534	0.0102973	3.25126e-05	0.000738501	0.495021	-1.01444
Christensenellaceae_R-7_group	0.00665076	0.0148385	0.00368455	0.0111889	0.0737095	0.180305	0.554004	-0.852032
Citrobacter	0.0017551	0.00367748	0.00130751	0.00298385	0.469781	0.49467	0.744973	-0.42474
Coprobacter	2.16828e-05	7.70475e-05	1.62724e-06	8.76293e-06	0.152383	0.269209	0.0750472	-3.73606
Coprococcus_1	0.00108691	0.00091273	0.000980184	0.00154696	0.0872148	0.195312	0.901812	-0.149102
Coprococcus_2	0.00755797	0.0134646	0.000889847	0.00214262	0.00124444	0.00860286	0.117736	-3.08637
Coprococcus_3	0.000232989	0.000542682	0.000115077	0.000326704	0.130827	0.253676	0.493918	-1.01766
Dialister	0.0198196	0.0489362	0.00729427	0.0169268	0.442735	0.472449	0.368034	-1.44209
Dorea	0.00900877	0.00773479	0.00492331	0.00462384	0.00604846	0.026714	0.546502	-0.871702
Faecalibacterium	0.153144	0.0968548	0.0977129	0.0785804	0.0142294	0.0514199	0.638046	-0.648267
Fusobacterium	0.00889743	0.0252699	0.00559604	0.0290723	0.0905033	0.19446	0.62895	-0.668983
GCA-900066575	6.04706e-05	0.000123591	3.3959e-05	5.95392e-05	0.096784	0.199853	0.561579	-0.832439
GCA-900066755	0.000331849	0.000525974	0.000277243	0.000569443	0.371391	0.431031	0.835449	-0.259376
Holdemanella	0.0107133	0.0193685	0.0105707	0.028057	0.244872	0.341531	0.986693	-0.0193264
Lachnoclostridium	0.0194127	0.0198737	0.0134575	0.0117047	0.160329	0.271194	0.693229	-0.528595
Lachnospira	0.00366166	0.010134	0.00224833	0.00598937	0.00564901	0.027218	0.614018	-0.703648
Lachnospiraceae_NC2004_group	0.000127287	0.000249504	6.22117e-05	0.000160887	0.242751	0.341571	0.488753	-1.03282
Lachnospiraceae_NK4A136_group	0.00361922	0.00656768	0.0024863	0.00513625	0.0374129	0.100825	0.68697	-0.541682
Lachnospiraceae_UCG-001	0.000275896	0.000804942	2.88629e-05	6.28888e-05	0.144611	0.261286	0.104615	-3.25684
Lachnospiraceae_UCG-004	0.000321978	0.000709316	0.000243088	0.000391507	0.204117	0.306176	0.754981	-0.405488
Lachnospiraceae_UCG-008	0.00108738	0.000960637	0.00106174	0.00113432	0.43078	0.475653	0.97642	-0.0344265
Lactococcus	1.05141e-05	2.76957e-05	9.02304e-06	2.23585e-05	0.433598	0.475463	0.858186	-0.220637
Megamonas	0.0127185	0.0412055	0.00161457	0.00403286	0.152854	0.267074	0.126946	-2.97771
Negativibacillus	0.000738433	0.0034547	5.06974e-05	0.000175791	0.10197	0.207863	0.0686554	-3.86448
Paraprevotella	0.00106035	0.00243562	9.85314e-05	0.000258194	0.0065935	0.0283342	0.0929236	-3.42781
Parasutterella	0.000957674	0.00230748	0.000178162	0.000673863	0.00126128	0.00835597	0.186036	-2.42634
Parvimonas	2.79888e-05	5.6049e-05	7.15407e-06	1.27622e-05	0.180452	0.292773	0.255605	-1.96801
Prevotella	0.000281626	0.00147529	1.38116e-05	3.74547e-05	0.298675	0.389257	0.0490422	-4.34983
Prevotella_2	0.0130141	0.0423407	0.000473971	0.00123454	0.0185313	0.0613849	0.03642	-4.77913
Prevotella_9	0.073539	0.0951283	0.0217124	0.0691472	0.0781475	0.185454	0.29525	-1.75999
Raoultella	0.00304001	0.0151026	0.000533229	0.00141398	0.49089	0.50033	0.175404	-2.51125
Rhodococcus	1.95936e-05	3.72455e-05	1.44872e-05	2.56052e-05	0.394615	0.44817	0.739383	-0.435606
Roseburia	0.0174945	0.0202393	0.0139866	0.0288622	0.0121753	0.0450204	0.799484	-0.322858
Ruminiclostridium_6	5.37087e-05	0.000159721	2.78668e-05	0.000135589	0.142044	0.262616	0.518851	-0.946608
Ruminiclostridium_9	0.000269972	0.000493018	0.000232092	0.000379623	0.39686	0.447523	0.859689	-0.218114
Ruminococcaceae_UCG-002	0.0113262	0.0240695	0.00671918	0.00936532	0.496976	0.496976	0.593242	-0.753308
Ruminococcaceae_UCG-003	0.000373145	0.000682107	0.000170792	0.000370229	0.0257095	0.0757002	0.457708	-1.1275
Ruminococcaceae_UCG-005	0.00553522	0.0230403	0.000906368	0.00164758	0.120203	0.238904	0.163746	-2.61047
Ruminococcaceae_UCG-014	0.0159973	0.034753	0.00710776	0.0234523	0.0053012	0.0263403	0.44431	-1.17036
Ruminococcus_1	0.00389808	0.00447187	0.00298223	0.00616237	0.163466	0.27359	0.76505	-0.386374
Ruminococcus_2	0.0198482	0.0434112	0.0103488	0.013568	0.366498	0.431653	0.521395	-0.939551
Slackia	0.00104712	0.00398626	4.17949e-05	0.00015372	0.121108	0.23773	0.0399142	-4.64695
Solobacterium	0.000107535	0.000218868	4.26147e-05	6.30431e-05	0.239	0.339294	0.396287	-1.33538
Sutterella	0.00135642	0.00649335	0.000440271	0.00040984	7.67257e-05	0.00110903	0.324583	-1.62334
Terrisporobacter	0.000235219	0.000438271	0.00019974	0.000464588	0.11998	0.241478	0.849165	-0.235884
[Eubacterium]_eligens_group	0.00224794	0.00518503	0.000540062	0.000746563	0.0835726	0.19258	0.240248	-2.05741
[Eubacterium]_ruminantium_group	0.00453566	0.00923721	0.00192028	0.00432649	0.185509	0.292039	0.423374	-1.24
[Ruminococcus]_gauvreauii_group	0.00173802	0.00266913	0.000907673	0.0017521	0.00880923	0.0359145	0.522246	-0.937199
[Ruminococcus]_torques_group	0.0215127	0.0263279	0.0200904	0.0248373	0.360806	0.434607	0.933882	-0.0986872
uncultured_bacterium_f_Muribaculaceae	0.00740585	0.020259	0.000184662	0.000915537	0.00138302	0.00879602	0.0249347	-5.3257
uncultured_bacterium_f_Prevotellaceae	0.00578569	0.0229633	3.5047e-06	1.88734e-05	6.54569e-05	0.00104076	0.000605753	-10.689
uncultured_bacterium_f_Saccharimonadaceae	0.000610154	0.0015069	0.000322029	0.000478664	0.187424	0.289325	0.527783	-0.921983
uncultured_bacterium_o_Bacteroidales	5.73389e-05	0.000309828	3.49727e-05	0.000151526	0.196919	0.298192	0.60993	-0.713285
