# Supplementary material for: Analysis of gut microbiota and metabolites in patients with rheumatoid arthritis and identification of potential biomarkers
Source: Aging (Albany NY). 2021 Oct 20;13(20):23689–701. doi: 10.18632/aging.203641 (PMC8580343; doi:10.18632/aging.203641)
Supplement: Supplementary Table 1D [file aging-13-203641-s005.xls]

## Sheet: D-genera more abundant in RA
Supplementary Table 1D. The genera that more abundance in RA group.
Genus	HC(Mean)	HC(Sd)	RA(Mean)	RA(Sd)	HC::RA(p)	HC::RA(p-corrected)	fc(ra/hc)	logFC
Abiotrophia	2.77706e-06	8.85803e-06	1.47169e-05	5.86479e-05	0.313507	0.395616	5.29947	2.40585
Acidaminococcus	6.50787e-07	3.56451e-06	6.34355e-05	0.000223522	0.136573	0.258514	97.475	6.60696
Acinetobacter	1.16531e-05	1.9695e-05	0.00341245	0.0178121	3.42464e-08	2.72259e-06	292.836	8.19395
Actinomyces	0.000349933	0.000587406	0.000434243	0.000477381	0.0399331	0.104088	1.24093	0.311422
Adlercreutzia	0.000320624	0.000453544	0.000959926	0.00274811	0.365434	0.433612	2.99393	1.58204
Aeromonas	5.10307e-05	5.26196e-05	7.29461e-05	7.40159e-05	0.227836	0.329326	1.42946	0.515466
Akkermansia	0.0119822	0.0389627	0.0457651	0.119349	0.00151327	0.00925421	3.81941	1.93335
Alistipes	0.0112238	0.0177752	0.0174944	0.0262595	0.153052	0.264513	1.55869	0.64033
Anaerostipes	0.00590687	0.00895697	0.0109383	0.0172409	0.183492	0.291752	1.8518	0.888926
Anaerotruncus	7.67615e-06	1.42466e-05	0.000179501	0.0004395	0.0301445	0.0840874	23.3842	4.54746
Barnesiella	0.000973576	0.00316136	0.0021383	0.00633849	0.278728	0.372418	2.19634	1.1351
Blautia	0.045644	0.0390431	0.06848	0.0555247	0.0147873	0.0522485	1.50031	0.585258
Butyricicoccus	0.0048823	0.00608064	0.00533864	0.0111374	0.145997	0.260827	1.09347	0.12891
Butyricimonas	0.000407418	0.000767455	0.000471669	0.00151118	0.131132	0.251205	1.1577	0.211267
CAG-56	0.00346635	0.00415476	0.00347974	0.00522449	0.254773	0.352251	1.00386	0.0055603
Candidatus_Stoquefichus	1.16684e-05	4.47432e-05	0.000351	0.00180206	0.225459	0.328881	30.0812	4.91079
Catabacter	2.2352e-05	4.30183e-05	0.000159714	0.000583021	0.0231432	0.0721522	7.14542	2.83702
Clostridioides	0	0	3.27431e-06	8.49463e-06	0.0192294	0.0623976	#DIV/0!	#DIV/0!
Clostridium_sensu_stricto_1	0.00567079	0.00898312	0.0142365	0.0334385	0.496976	0.500121	2.51049	1.32797
Collinsella	0.0164997	0.0274281	0.0180991	0.0265076	0.436755	0.472409	1.09693	0.133473
Coprobacillus	1.61584e-05	3.61684e-05	0.00021887	0.000835525	0.0950044	0.198759	13.5453	3.75972
Corynebacterium	1.15623e-05	2.79269e-05	2.24684e-05	3.1979e-05	0.0290469	0.083972	1.94324	0.958464
DTU089	2.07193e-05	9.26564e-05	0.000282867	0.000922059	0.00108761	0.00786042	13.6523	3.77108
Desulfovibrio	0.00145311	0.002773	0.00245546	0.00527883	0.0746704	0.179888	1.68979	0.756847
Eggerthella	0.000515942	0.00114961	0.00322052	0.00684728	0.000300884	0.00318937	6.24202	2.64201
Eisenbergiella	2.2379e-05	2.83077e-05	0.000541722	0.00127588	0.000132625	0.00162211	24.2067	4.59733
Enorma	6.15017e-07	3.36859e-06	0.00118583	0.00414967	0.000400365	0.00397863	1928.12	10.913
Enterobacter	0.00207959	0.00706834	0.00499442	0.0158925	0.26424	0.356052	2.40164	1.26402
Enterococcus	0.000268185	0.000209645	0.00296786	0.0105808	2.42318e-06	9.63213e-05	11.0665	3.46812
Erysipelatoclostridium	0.000545851	0.00175215	0.00526571	0.0238504	0.000568133	0.00501851	9.64678	3.27005
Erysipelotrichaceae_UCG-003	0.0126825	0.0172095	0.0145758	0.033001	0.0247889	0.0743667	1.14929	0.200739
Escherichia-Shigella	0.0547681	0.0939068	0.0839528	0.127078	0.279699	0.370601	1.53288	0.616243
Eubacterium	8.57021e-06	1.43867e-05	0.00105918	0.00495336	0.000423833	0.00396409	123.589	6.9494
Faecalitalea	0.000310898	0.000642271	0.000699448	0.00220138	0.471961	0.493696	2.24977	1.16978
Family_XIII_AD3011_group	8.34769e-05	9.71651e-05	0.000408476	0.001645	0.360091	0.437057	4.89328	2.2908
Flavonifractor	0.000316999	0.000773054	0.00181379	0.00350773	0.00067077	0.00533262	5.72175	2.51646
Fournierella	1.3142e-06	5.0182e-06	2.58383e-05	0.000121137	0.166449	0.275681	19.6609	4.29726
Gemella	4.94227e-05	0.000139675	5.7209e-05	0.000120201	0.186418	0.290592	1.15755	0.211068
Gordonibacter	3.08108e-05	4.65342e-05	7.69559e-05	0.000132148	0.258598	0.354458	2.49769	1.3206
Granulicatella	8.89576e-05	0.000167942	0.000122626	0.000187925	0.220927	0.328294	1.37848	0.463077
Haemophilus	0.000570239	0.0013642	0.00179711	0.00508349	0.054274	0.136977	3.15151	1.65604
Holdemania	5.91166e-05	6.99067e-05	0.000282573	0.000623377	0.223738	0.329392	4.77994	2.25699
Hungatella	0.000141629	0.00031111	0.000380925	0.000618332	0.0384074	0.10178	2.6896	1.42739
Intestinimonas	1.43228e-05	4.47187e-05	7.64087e-05	0.000227509	0.0246684	0.0754284	5.33474	2.41542
Klebsiella	0.0126475	0.0412062	0.0251578	0.0726847	0.305753	0.395241	1.98916	0.992156
Lachnospiraceae_FCS020_group	0.000524657	0.000469266	0.000585034	0.000646327	0.478788	0.497564	1.11508	0.157145
Lachnospiraceae_FE2018_group	0.00010771	0.000166894	0.00037899	0.000684664	0.00569379	0.0266268	3.51863	1.81501
Lachnospiraceae_ND3007_group	0.00110044	0.0015255	0.00140635	0.0056657	0.010462	0.0396062	1.27798	0.353867
Lactobacillus	0.00559815	0.0219267	0.0232392	0.0600505	2.82853e-05	0.00074956	4.15123	2.05354
Marvinbryantia	0.000163738	0.000157555	0.000287183	0.000441121	0.354698	0.433823	1.75392	0.81058
Megasphaera	5.95527e-06	1.86821e-05	0.00237094	0.00724507	2.26515e-05	0.000720318	398.124	8.63708
Merdibacter	0	0	3.87896e-05	0.000177832	0.0192294	0.0611496	#DIV/0!	#DIV/0!
Morganella	6.04917e-07	3.31327e-06	1.34913e-06	5.05015e-06	0.261998	0.356048	2.23027	1.15722
Nicotiana_otophora	7.09538e-05	0.000184255	0.00181899	0.00508309	2.63395e-09	4.18797e-07	25.6363	4.68012
Odoribacter	0.000142128	0.000202723	0.000274344	0.000848051	0.0319515	0.0875912	1.93026	0.948794
Olsenella	1.86093e-05	4.68056e-05	0.000415375	0.00172952	0.00770179	0.0322259	22.3208	4.48032
Oribacterium	1.51703e-05	3.55336e-05	3.05977e-05	0.000132125	0.488413	0.50427	2.01695	1.01218
Oscillibacter	0.000154861	0.000294852	0.000964414	0.00216594	0.0101794	0.0394763	6.22759	2.63867
Parabacteroides	0.00317614	0.00372438	0.0100193	0.012659	0.0803858	0.187961	3.15456	1.65744
Paraeggerthella	3.23537e-06	1.77208e-05	7.63541e-05	0.00041118	0.490355	0.503009	23.5998	4.56071
Peptococcus	1.88279e-06	5.80622e-06	0.000359571	0.00191953	0.182885	0.293725	190.978	7.57726
Peptostreptococcus	1.26602e-05	2.92897e-05	1.99968e-05	3.54317e-05	0.0937767	0.198807	1.5795	0.659469
Phascolarctobacterium	0.00714912	0.0111017	0.00775379	0.0125828	0.338347	0.417033	1.08458	0.117137
Pseudomonas	0	0	2.3453e-05	0.000102774	0.0096839	0.0384935	#DIV/0!	#DIV/0!
Pseudopropionibacterium	3.75044e-06	8.80028e-06	5.1096e-06	1.15708e-05	0.368909	0.431298	1.3624	0.446151
Pyramidobacter	2.78539e-05	0.000129715	0.00302584	0.0142179	0.00306322	0.0173947	108.633	6.76331
Raoultibacter	9.87147e-06	2.05705e-05	0.000108188	0.000297743	0.0165709	0.0572775	10.9597	3.45413
Robinsoniella	1.13382e-05	2.96302e-05	1.8904e-05	3.71721e-05	0.0858033	0.194896	1.66728	0.737499
Romboutsia	0.0156384	0.026508	0.0200117	0.0258859	0.4071	0.455838	1.27965	0.355749
Rothia	0.000208055	0.000249314	0.00148885	0.00231528	3.67117e-05	0.000729645	7.15606	2.83917
Ruminiclostridium_5	0.00122266	0.00211494	0.00342726	0.00871577	0.0178661	0.0604406	2.80312	1.48704
Ruminococcaceae_NK4A214_group	0.00202245	0.00429058	0.00203719	0.00424919	0.326816	0.405967	1.00729	0.0104814
Ruminococcaceae_UCG-004	0.000360281	0.000512731	0.00096095	0.00158593	0.141106	0.263952	2.66722	1.41534
Ruminococcaceae_UCG-013	0.00516142	0.0109101	0.0093665	0.0151399	0.297822	0.391352	1.81471	0.859741
Scardovia	1.60187e-06	8.77381e-06	2.62134e-05	6.65109e-05	0.000736212	0.00557418	16.3643	4.03248
Sellimonas	2.04979e-05	2.49307e-05	0.00198862	0.00596811	2.55727e-07	1.35536e-05	97.0157	6.60015
Senegalimassilia	4.8282e-05	0.000181711	0.00126319	0.00405214	0.00603111	0.0273985	26.1627	4.70944
Staphylococcus	6.11681e-05	0.000147366	0.000146648	0.000554469	0.4957	0.502014	2.39746	1.26151
Stenotrophomonas	7.43915e-07	4.07459e-06	0.000333303	0.00176106	0.0025936	0.0152734	448.039	8.80748
Streptococcus	0.00774265	0.0147146	0.0361593	0.0523329	9.87232e-05	0.00130808	4.67014	2.22347
Subdoligranulum	0.0345086	0.0488853	0.0485749	0.0633947	0.316467	0.396207	1.40762	0.493256
Turicibacter	0.00047715	0.000800787	0.00115638	0.00300072	0.412286	0.458415	2.42352	1.27711
Tyzzerella_3	0.000487638	0.000899827	0.00117735	0.00492578	0.361649	0.432347	2.41439	1.27166
Tyzzerella_4	0.000965624	0.00284114	0.00688179	0.0297777	0.00398036	0.0210959	7.12678	2.83325
UBA1819	0.000433927	0.00104338	0.00305282	0.0054365	4.43804e-05	0.000784054	7.03532	2.81462
Veillonella	0.000175191	0.000309071	0.001111	0.00187362	0.00349039	0.019137	6.34166	2.66486
Weissella	0.000152657	0.000506509	0.000599845	0.00205825	0.305955	0.392313	3.92937	1.9743
[Clostridium]_innocuum_group	0.00017456	0.000495262	0.000650768	0.00134738	0.000212716	0.00241584	3.72804	1.89842
[Eubacterium]_coprostanoligenes_group	0.0094884	0.0166414	0.010036	0.0139127	0.460747	0.488391	1.05772	0.0809532
[Eubacterium]_hallii_group	0.00620311	0.0074607	0.00687473	0.00800938	0.436755	0.469217	1.10827	0.148312
[Eubacterium]_ventriosum_group	0.000707784	0.000971624	0.00183116	0.00262442	0.0539186	0.138275	2.58717	1.37138
[Ruminococcus]_gnavus_group	0.00472238	0.00799736	0.00747395	0.0111736	0.089825	0.195646	1.58267	0.662357
uncultured_bacterium_f_Coriobacteriales_Incertae_Sedis	8.60769e-05	0.000244047	0.000847647	0.00249965	0.238033	0.340966	9.84756	3.29977
uncultured_bacterium_f_Lachnospiraceae	0.00347	0.00375158	0.00596747	0.00833376	0.142553	0.260528	1.71973	0.782183
uncultured_bacterium_f_Peptostreptococcaceae	0.0011063	0.00209725	0.00514316	0.00864079	0.160293	0.27405	4.64896	2.21691
uncultured_bacterium_f_Ruminococcaceae	0.000721412	0.00124196	0.00127165	0.00256878	0.0884911	0.195418	1.76272	0.817807
uncultured_bacterium_o_Mollicutes_RF39	0.000319567	0.00061738	0.00153852	0.00566032	0.372408	0.425992	4.8144	2.26736
