# Supplementary material for: Analysis of gut microbiota and metabolites in patients with rheumatoid arthritis and identification of potential biomarkers
Source: Aging (Albany NY). 2021 Oct 20;13(20):23689–701. doi: 10.18632/aging.203641 (PMC8580343; doi:10.18632/aging.203641)
Supplement: Supplementary Table 1E [file aging-13-203641-s006.xls]

## Sheet: E-genera abundant each sample
Supplementary Table 1E. The genera abundance in every sample.
Genus	HC1	HC2	HC3	HC4	HC5	HC6	HC7	HC8	HC9	HC10	HC11	HC12	HC13	HC14	HC15	HC16	HC17	HC18	HC19	HC20	HC21	HC22	HC23	HC24	HC25	HC26	HC27	HC28	HC29	HC30	RA1	RA2	RA3	RA4	RA5	RA6	RA7	RA8	RA9	RA10	RA11	RA12	RA13	RA14	RA15	RA16	RA17	RA18	RA19
Abiotrophia	0	0	0	0	0	0	0	0	0	0	0	0	0	0	1.70192e-05	0	0	0	0	0	0	0	0	0	0	0	2.99976e-05	3.6295e-05	0	0	0	7.62273e-05	0	0	0	0	0	0	0	0	0	0	0	0	0	0	0	0	0
Acidaminococcus	0	0	0	0	0	0	0	0	0	0	0	0	0	0	0	0	0	0	0	0	0	0	0	0	0	0	0	0	0	1.95236e-05	0	0	0.000894579	0	0	0	0	0	0	0	0	0	0	0	0	0	0.000105919	0.000839133	0
Acinetobacter	0	0	0	2.07022e-05	0	2.54033e-05	0	0	1.60187e-05	0	0	6.47487e-05	0	0	0	0	0	0	0	4.25568e-05	0	2.00196e-05	0	0	0	1.7133e-05	2.99976e-05	5.44425e-05	0	5.85709e-05	0	2.54091e-05	3.08475e-05	1.77236e-05	5.1767e-05	0.000149516	0.000141483	0.000133375	4.80515e-05	4.28679e-05	0.000491006	0.000119986	0.00014157	0.000202254	0.000147372	7.07414e-05	4.23675e-05	0.000148082	8.45737e-05
Actinomyces	4.46349e-05	0.00163096	9.45962e-05	0.000517555	2.42518e-05	0.00015242	9.01591e-05	5.53516e-05	0.00289939	0.000577654	0.000279933	0.000129497	0.00051446	0	0.000782885	0	3.64e-05	0.000453627	7.07714e-05	4.25568e-05	0.000143284	0.000580569	0.000135885	6.34733e-05	9.15185e-05	0.000548255	0.000209983	0.00014518	2.65583e-05	0.000156189	0.000465766	0.000355727	0.000478137	0.000638049	0	0.000112137	0.000165063	0.000333437	0	0.000428679	4.46369e-05	0.000259969	0.000259544	0.000643536	2.10531e-05	0.000353707	0.000233021	0.000691051	0.000828823
Adlercreutzia	2.23174e-05	7.41345e-05	7.09471e-05	0.000289831	0.000436533	0.00187984	0.000586034	0.00110703	1.60187e-05	0	0	4.31658e-05	1.83736e-05	0.000795962	0	0.000189954	0.0002548	0	2.35905e-05	0.000829858	0.000167164	0	0.00128121	0.000444313	2.28796e-05	0.000376925	0.000419966	0	5.31166e-05	0.00021476	0.000341562	0	0	0	3.45113e-05	0.000691511	0.00386719	0.0017561	4.80515e-05	6.43018e-05	4.46369e-05	0.000839899	0.00106177	1.83867e-05	0.000673698	1.76853e-05	0.00108037	0.00123402	0.00142084
Aeromonas	0	1.85336e-05	4.72981e-05	0.000124213	0.000145511	2.54033e-05	0	0.000129154	0	1.6046e-05	3.99904e-05	0.000129497	7.34943e-05	4.18927e-05	0	2.71363e-05	0	0	7.07714e-05	0.000106392	7.16418e-05	2.00196e-05	0	2.11578e-05	0	1.7133e-05	8.99928e-05	0.000163328	0.000132792	1.95236e-05	0	0.000101636	0	0	8.62783e-05	0.000168205	7.07414e-05	4.44583e-05	7.20773e-05	0.000192905	0.000111592	0	0.000235949	0.000147094	6.31592e-05	0	2.11837e-05	0.000222124	0
Agathobacter	0.0933315	0.00120469	0.120161	0.0430399	0.0418587	0.00650324	0.182888	0.0035056	0.00478959	0.000320919	0.0235144	0.0146116	0.00156175	0.0395258	0.183399	0.0325907	0.122086	0.0268465	0.180444	0.0129373	0.035606	0.000920902	0.0709516	0.0140064	0.0205459	0.0343002	0.0176086	0.000381098	0.00470082	0.145861	0.0163639	0.009503	6.16951e-05	0.035199	0.00051767	0.00912047	0.0119317	0.0798471	0.0594157	0.0185832	0.00600366	0.00937887	0.117078	0.010885	0.157077	0.0375814	0.00150405	0.00974875	0.00908322
Akkermansia	0.000111587	0	0.000118245	0.0018218	0.00472911	2.54033e-05	0.0105937	3.6901e-05	6.40748e-05	0	1.99952e-05	0.000949647	3.67471e-05	2.09464e-05	0	0.0419527	0	0.000103097	0.000306676	0.18576	0.000167164	0.000100098	9.7061e-05	0.000105789	9.15185e-05	0.000102798	0.00227982	0.000417393	0.109181	0.000273331	0.000248409	0.000101636	0	0.000301301	0.513373	0.000541995	0.000872477	0.013582	0.0155447	0.000900225	0.000691872	0.000319962	0.000235949	0.000202254	0.000315796	0.000106112	0.231708	0.0772249	0.00216509
Alistipes	0.00343689	0.0111943	0.0121793	0.0150919	0.0210506	0.0406706	0.0265969	0.000166055	6.40748e-05	1.6046e-05	0.000579861	0.000733818	0.000146989	0.00496429	8.50962e-05	0.0259694	0.000600601	0.000144336	0.00658174	0.0105966	0.000167164	0.000180177	0.000310595	0.016228	0.0541332	0.000496856	0.0099592	0.000163328	0.0739914	0.00021476	0.00235988	0.0002795	0.00114136	0.000106341	0.0019844	0.00577505	0.0754575	0.00704664	0.0343088	0.0196549	0.0290586	0.00279966	0.0536313	0.000220641	0.0341902	0.0122913	0.0154641	0.0403771	0.000219892
Allisonella	0.000111587	0	0	0	0	0	0.000157778	0.000405912	0	0	0	0.000194246	0	0	0	0.000325636	0.000273	0	0	2.12784e-05	0.000549254	0.00124122	0.00114532	0	0	1.7133e-05	0	0.000453688	0.000292141	0.0018157	0	0	0	3.54472e-05	0	0	4.71609e-05	2.22291e-05	7.20773e-05	0	0	1.99976e-05	0	0	0	0	0	4.93608e-05	0
Alloprevotella	0	0	0	2.07022e-05	0	0	0	0	0	1.6046e-05	1.99952e-05	2.15829e-05	1.83736e-05	0	3.40385e-05	0	0.0329784	4.12388e-05	2.35905e-05	0	0.0176716	0	0	0	0	0.00471157	0	0	2.65583e-05	0.0035533	0.000341562	0.000254091	0	0.0308568	0.000189812	0.0003551	0.000353707	0.000177833	0.000240258	0.000278641	0.000245503	3.99952e-05	0.000188759	9.19337e-05	8.42123e-05	1.76853e-05	0.000127102	0.000148082	0
Anaerostipes	0.000781111	3.70672e-05	0.00773324	0.000538258	0.00138235	0.00909437	0.0124645	0.000129154	0.000913066	0.0457631	0.0110174	0.00589213	0.00696358	0.00684946	0.0184999	0.00404331	0.0004186	0.00470122	0.00337344	0.00142565	0.000286567	4.00392e-05	0.00106767	0.00569144	0.00478184	0.0152826	0.00140989	0.00629718	0.000132792	0.000195236	0.000155255	0.0318884	0.00766561	0.000708943	6.90226e-05	0.000672822	0.00264101	0.00526831	0.000744798	0.000128604	0.0123421	0.00483942	0.00972111	0.00843952	0.0129687	8.84267e-05	0.00423675	0.00323313	0.078366
Anaerotruncus	2.23174e-05	1.85336e-05	0	0	2.42518e-05	0	0	0	0	0	0	0	0	0	0	0	0	0	0	0	2.38806e-05	4.00392e-05	0	0	0	0	2.99976e-05	1.81475e-05	5.31166e-05	0	0	0	4.62713e-05	0	0	0.000299032	0	0	0	0	0.000111592	0	7.07848e-05	0.000349348	0	0	0.000487226	9.87216e-05	0
Atopobium	0	0	2.3649e-05	0	0	0	0	0	0.000881029	1.6046e-05	0	0	0.000128615	0	0.000119135	0	0	4.12388e-05	0	6.38352e-05	0	2.00196e-05	0	0	0	3.42659e-05	0	0	0	0	3.10511e-05	2.54091e-05	4.62713e-05	1.77236e-05	0	3.7379e-05	0	2.22291e-05	2.40258e-05	2.14339e-05	6.69553e-05	3.99952e-05	0	0.00011032	0	1.76853e-05	2.11837e-05	0	3.38295e-05
Bacteroides	0.0892921	0.0803618	0.306279	0.0701598	0.0164912	0.242246	0.221498	0.0745401	0.00249892	0.389227	0.286011	0.0582954	0.0534855	0.233259	0.141481	0.241676	0.00782601	0.0311559	0.059849	0.127713	0.00341493	0.284859	0.00997787	0.0257067	0.0706523	0.0197886	0.0469462	0.142367	0.0412451	0.00599375	0.0071107	0.0739404	0.238359	0.0015065	0.00848978	0.0455089	0.104131	0.0134486	0.141872	0.0173615	0.172053	0.0126385	0.0788306	0.281887	0.193267	0.121198	0.0541668	0.0943531	0.00328146
Barnesiella	0.00227638	0.0171992	0.00132435	2.07022e-05	0.00203715	0.00243871	0	7.38021e-05	1.60187e-05	0	0	0	0	0	0	0	0	0	0	0	0.000191045	0	0.000368832	0	0.00196765	0	2.99976e-05	3.6295e-05	0.00116857	5.85709e-05	3.10511e-05	0.000101636	0	1.77236e-05	0.00481433	1.86895e-05	0.0294992	0.000822478	2.40258e-05	0.00291501	4.46369e-05	1.99976e-05	2.35949e-05	0	0	0.000672043	0	0.0185597	0
Bifidobacterium	0.097795	7.41345e-05	0.139719	0.000248427	0.00254644	0.0198146	0.00317811	5.53516e-05	0.00973938	0.00362639	0.000979765	0.0120001	0.260592	0.000251356	0.0147046	0.0438523	0.0002184	0.105427	0.0486671	0.222147	0.000597015	0.0252247	0.000155298	0.0448333	0.014071	0.00197029	0.0012299	0.294298	0.015032	0.000683327	0.00353982	0.008944	0.0686049	0.00935805	0.000931806	0.114548	0.00459819	0.00253412	0.0150401	0.000407245	0.0703254	0.0041595	0.0717522	0.137717	0.00267374	0.109738	0.00550777	0.00794709	0.000524357
Bilophila	0.000245492	0.00046334	0.000141894	0.000124213	0.000412281	0.000330243	0.000202858	0.000110703	4.80561e-05	1.6046e-05	0.000139966	0.0010144	1.83736e-05	0.000565552	0	0.000108545	0.0003276	0	0	0.000723466	0.0025791	0.00104102	0.000116473	0.000613575	0.000274556	0.0102626	0.000449964	0.00776713	0.00119512	0.00122999	0	0.000254091	0.000107966	0.000106341	0.00091455	7.4758e-05	0.00146199	0.000466812	0.000312335	0.00175758	0	1.99976e-05	0.000755038	0	0.00623171	1.76853e-05	0.00122866	7.40412e-05	0.000896482
Blautia	0.0154214	0.198643	0.0498995	0.0377401	0.0238638	0.0572082	0.0372132	0.0312552	0.0457815	0.128785	0.0369511	0.0128418	0.064675	0.0447833	0.029137	0.0216819	0.0205842	0.0624768	0.0159	0.0323432	0.0177194	0.0645032	0.0314672	0.0515614	0.0290571	0.0813473	0.0113091	0.0860555	0.012987	0.0161265	0.0988356	0.0656571	0.186766	0.0255397	0.106105	0.049658	0.129999	0.105299	0.0463457	0.0213696	0.0397715	0.0785106	0.0429899	0.0420873	0.0184214	0.0264573	0.0640173	0.0937361	0.268183
Butyricicoccus	0.00120514	0.0267996	0.00281424	0.00225654	0.00254644	0.000381049	0.00322319	0.00952047	0.00297948	0.00357825	0.00663841	0.00401442	0.00973799	0.00946775	0.00171894	0.000569862	0.001729	0.0062683	0.00134466	0.000744744	0.0024597	0.0212408	0.0105991	0.00243314	0.000526231	0.000342659	0.0038097	0.00644236	0.00015935	0.00091761	0.00931532	0.0205305	0.0127709	0.00271171	0.00864509	0.000261653	0.00160347	0.00186725	0.000696747	0.000257207	0.00140606	0.00197976	0.00264263	0.00189383	0.00726331	0.00279428	0.000233021	0.00241868	0.0583559
Butyricimonas	0.00095965	3.70672e-05	0	0.000828089	0	0.000863711	0.000405716	7.38021e-05	1.60187e-05	0	0	4.31658e-05	0	0.000397981	5.10577e-05	0.000488454	0.0003094	0	0.000589762	0.000553239	0	0	0.00017471	0.00317366	0.000205917	3.42659e-05	8.99928e-05	0	0.0028683	5.85709e-05	0	0	7.71188e-05	0	0	0	0.000259385	8.89166e-05	0.000120129	0.000171471	0	3.99952e-05	0.000377519	1.83867e-05	0.00054738	0.000707414	0.00167352	0.000123402	0
CAG-352	0	0	0	0	0	5.08066e-05	0	0	0	0	0	0	0	2.09464e-05	0	0	0	0	0	0	2.38806e-05	0	0	0	0.00121262	3.42659e-05	0.000929926	0	0.0145008	0	0	0	0	0	0	0	0	0	0	0	0	0	0	0	0	0	0	0	1.69147e-05
CAG-56	0.00267809	0.000815479	0.00281424	0.00351938	0.00807586	0.000482662	0.00759591	0.000184505	0.000929085	1.6046e-05	0.00715828	0.00472665	0.000532834	0.0118766	0.0036251	0.00626849	0.0002912	0.000206194	0.00375088	0.000446847	0.000167164	0.00250245	0.019121	0.00363913	0.00327179	0.000256995	0.00335973	0.00431911	0.000265583	0.00109332	0.00027946	0.00132127	1.54238e-05	0.000301301	0.000310602	0.000392479	0.0178504	0.00308985	0.00269088	0.000471546	0.000959693	0.00393953	0.00847058	0.00617795	0.00673698	1.76853e-05	0.000275389	0.00510884	0.000625846
Candidatus_Soleaferrea	4.46349e-05	0	2.3649e-05	0	4.85037e-05	2.54033e-05	4.50796e-05	9.22526e-05	0	0	0	2.15829e-05	0	0	0	2.71363e-05	7.28001e-05	0	2.35905e-05	0	0.000167164	6.00589e-05	5.82366e-05	0.000126947	0	0.000736718	2.99976e-05	0	0	1.95236e-05	9.31532e-05	0	0.000200509	3.54472e-05	0.000103534	0	2.35805e-05	0.000111146	0	0	4.46369e-05	1.99976e-05	2.35949e-05	0	8.42123e-05	5.3056e-05	0.000127102	0	0
Candidatus_Stoquefichus	0	0.000240937	0	0	0	0	4.50796e-05	0	0	0	0	0	0	0	3.40385e-05	0	0	0	0	0	0	0	0	0	0	0	2.99976e-05	0	0	0	0	0	0	0	0.00971494	0	0	0	0	0	2.23184e-05	0	0	0	0	0	0	0	1.69147e-05
Catabacter	6.69523e-05	0	2.3649e-05	0	0	0.000101613	0	0	0	0	0	0	0	0	0	8.14089e-05	1.82e-05	0	0	0.000191506	4.77612e-05	0	0	6.34733e-05	2.28796e-05	0	0	0	5.31166e-05	0	3.10511e-05	0	1.54238e-05	1.77236e-05	0	0.000130826	7.07414e-05	8.89166e-05	0	0	0.000223184	3.99952e-05	9.43797e-05	0	2.10531e-05	0	8.4735e-05	0.000296165	0
Catenibacterium	0	0	0	0	0	0	0	0	0	0	0	0	1.83736e-05	0	0	0	0.000837201	0	2.35905e-05	2.12784e-05	0.0285134	2.00196e-05	0	0	0	1.7133e-05	2.99976e-05	5.44425e-05	7.96749e-05	0.0931277	0.000403664	0.000304909	0	0.0555634	0.00012079	0.000149516	0.000259385	0.000155604	0.000144155	8.57357e-05	0.000111592	0.000179978	0.000165164	0.000165481	0.000231584	7.07414e-05	0.00016947	0.000123402	3.38295e-05
Christensenellaceae_R-7_group	0.00334762	0	2.3649e-05	0.00132494	0.00615997	0.00315001	0.000608574	1.84505e-05	3.20374e-05	8.02298e-05	1.99952e-05	0.00468349	9.18679e-05	0.00102637	5.10577e-05	0.0521017	0.000509601	6.18582e-05	0.00677046	0.000510682	0.0100776	0	0.0017471	0.0080611	0.00423273	0.0017133	0.0268479	0.000199623	0.0628104	0.00326045	0.00763857	0.000584409	0	0.00189642	1.72557e-05	3.7379e-05	0.00287682	0.00313431	0.00172985	0.0109099	4.46369e-05	0.000279966	0.00913123	5.51602e-05	8.42123e-05	7.07414e-05	0.0598865	0.00140678	3.38295e-05
Citrobacter	8.92698e-05	0.000111202	7.09471e-05	0.000952302	9.70073e-05	0.000203226	2.25398e-05	0.000184505	0.00528617	0.000385103	0	0.00110073	0.00110241	2.09464e-05	1.70192e-05	0.000244227	0.000509601	0.000948493	4.71809e-05	4.25568e-05	0.000143284	0.0112911	0.0112785	0.000148104	0.00334043	1.7133e-05	0.0135889	0.00021777	7.96749e-05	0.00111285	0.00235988	0.00101636	0	0.000159512	5.1767e-05	7.4758e-05	7.07414e-05	4.44583e-05	0.0155687	0.000557282	0.000111592	5.99928e-05	0.000637063	0.000147094	4.21061e-05	0	0.00120747	7.40412e-05	0
Clostridioides	0	0	0	0	0	0	0	0	0	0	0	0	0	0	0	0	0	0	0	0	0	0	0	0	0	0	0	0	0	0	3.10511e-05	0	0	0	0	0	0	0	0	0	0	1.99976e-05	0	0	0	0	0	0	0
Clostridium_sensu_stricto_1	0.000379397	1.85336e-05	0.000165543	0.00055896	0.00172188	0.0351073	0.000428256	0.000110703	0.000288337	8.02298e-05	0.0247141	0.00217987	0.000900305	0.000146624	0.000238269	0.0027679	0.0106288	0.000164955	0.000330267	0.00419185	0.0266985	0.00560549	0.017141	0.0129909	0.00425561	0.000119931	0.00506959	0.00239547	0.00525855	0.00546661	0.00276355	0.000203273	3.08475e-05	0.00710716	0.000172557	0.08186	0.0184635	0.0079358	0.00319543	0.000278641	0.000200866	0.0364356	0.0178614	0.000864177	0.0044843	0.000176853	0.160107	0.00347993	0.000913396
Collinsella	0.00484289	7.41345e-05	4.72981e-05	0.00291901	9.70073e-05	0.00015242	0.014741	0.00208491	0.0183574	0.000144414	0.0025194	0.00271944	0.0848492	0.00762447	0.0325068	0.00187241	0.0704887	0.114335	0.0129748	0.0244063	0.0191045	0.007147	0.0105602	0.000719364	0.00475896	0.0404509	0.00395968	0.00014518	0.00539134	0.00499805	0.0157429	0.0782092	1.54238e-05	0.0393464	8.62783e-05	0.0338467	0.000353707	0.0485707	0.00182596	0.00636588	0.0760836	0.0191177	0.00202916	0.000294188	0.00633698	0.000159168	0.0146168	0.0940323	0.000186062
Coprobacillus	0	9.26681e-05	0	0	0	2.54033e-05	2.25398e-05	0	0	4.81379e-05	0	0	1.83736e-05	0	0	0	0	0	0	0.000170227	0	2.00196e-05	0	0	0	3.42659e-05	0	0	5.31166e-05	0	0	0	0	0	0	3.7379e-05	2.35805e-05	0	0	0	0.000401732	0.000539935	0.000235949	0	0	0	6.35512e-05	0	0
Coprobacter	0.000156222	0	0	0	0.000388029	0	0	0	0	0	0	0	0	0	0	0	0	0	0	0	0	0	0	0	0	0	0	0	0.000106233	0	0	0	0	0	0	0	0	0	0	0	0	0	4.71898e-05	0	0	0	0	0	0
Coprococcus_1	0.00116051	0.000704278	0.000685822	0.00167688	0.00244943	0.00299759	0.000946671	0.00230632	0.000112131	1.6046e-05	0.00109974	0.00202879	5.51207e-05	0.00278587	3.40385e-05	0.00105832	0.0011102	0	0.0009908	0.00244702	0.00100299	0	0.00153356	0.00112136	0.00128126	1.7133e-05	0.00200984	0	0.000292141	0.000683327	3.10511e-05	0.000508182	0	0.000389919	3.45113e-05	0.00214929	2.35805e-05	0.00224514	0.000528567	0.00199336	0.00658394	5.99928e-05	0.00146289	0.00115837	6.31592e-05	1.76853e-05	0.0043003	0.00229528	1.69147e-05
Coprococcus_2	0.0177424	0.000111202	0.0521698	0.022731	0.0345589	7.62098e-05	0.000157778	9.22526e-05	3.20374e-05	0	5.99856e-05	4.31658e-05	0	0	0	0.000434181	0.0036946	0.000164955	0.0194385	0.00012767	0.010794	8.00785e-05	1.94122e-05	0.0248604	0.00599446	5.13989e-05	0.0325774	9.07375e-05	0.000265583	0.000370949	0.00881851	0.000559	0	7.08943e-05	1.72557e-05	0	0.00122618	0.000466812	0.00653501	0.0047369	2.23184e-05	0	4.71898e-05	1.83867e-05	2.10531e-05	0	0.000762615	0.00244336	0
Coprococcus_3	0.000156222	0	0	0.000496853	4.85037e-05	5.08066e-05	2.25398e-05	1.84505e-05	0	0	0	0.000453241	0	6.28391e-05	1.70192e-05	8.14089e-05	0.0002548	0	7.07714e-05	0	0.00102687	0	0.00234888	0	2.28796e-05	0	0.00011999	0	0	0.0017376	6.21022e-05	0	0	0.000230407	0	0	4.71609e-05	0	9.6103e-05	0.00169328	2.23184e-05	1.99976e-05	0.000165164	0	0.000526327	0	0	0	0
Corynebacterium	0	0	0	2.07022e-05	0	0	0	0	8.00935e-05	6.41838e-05	0	0	0	0	0	0	0	0	0	2.12784e-05	0	0	0	2.11578e-05	0	0.000119931	0	0	0	1.95236e-05	3.10511e-05	7.62273e-05	0	1.77236e-05	0	7.4758e-05	0	0	0	2.14339e-05	0	1.99976e-05	0	1.83867e-05	0	0	4.23675e-05	4.93608e-05	6.7659e-05
DTU089	0	0	4.72981e-05	0	2.42518e-05	0.000508066	0	0	0	0	0	0	1.83736e-05	0	0	0	0	0	2.35905e-05	0	0	0	0	0	0	0	0	0	0	0	0.000186306	0	0	0	0	0.000149516	0	0.000133375	0	0	0.000669553	0.000159981	7.07848e-05	1.83867e-05	0.000147372	0.00498727	0.000381307	0.000271484	1.69147e-05
Desulfovibrio	0.00609266	0	0	4.14044e-05	0	0	0	0	1.60187e-05	0	0	0.00030216	1.83736e-05	0.00245072	0	0.0036634	0	2.06194e-05	0	0	0	4.00392e-05	1.94122e-05	0.00539523	0.00796211	0.00159337	0.00467963	1.81475e-05	0.0105968	0.000683327	0.00403664	5.08182e-05	0	5.31707e-05	1.72557e-05	1.86895e-05	2.35805e-05	0.00517939	2.40258e-05	0.0125388	0	0	0.0125053	1.83867e-05	6.31592e-05	3.53707e-05	0.0216074	0.000246804	3.38295e-05
Dialister	2.23174e-05	5.56009e-05	0.0185172	2.07022e-05	2.42518e-05	0.0446336	0.000180318	5.53516e-05	0.00426098	0.000240689	9.9976e-05	0.000539572	0.000367471	0.00023041	0.244567	0.0219533	0.000182	0.000288672	0.0994102	0.000297898	0.0111045	6.00589e-05	0.00017471	0.0669431	0.000114398	5.13989e-05	0.0611951	0.0187464	0.000132792	0.000117142	0.000589971	0.000254091	0	0.0817766	0.000189812	0.000672822	0.000471609	0.000400124	0.0328432	0.000643018	0.0274517	0.000239971	0.000967392	0.00448637	0.013074	0.000123797	0.00580435	0.0198677	0.000135318
Dorea	0.00232101	0.0164023	0.00387844	0.00540328	0.00208566	0.00640163	0.00633368	0.00645768	0.00756083	0.0039794	0.00695833	0.00461874	0.0164627	0.0104522	0.00522491	0.00168245	0.0111384	0.00645387	0.00323189	0.00704315	0.0194866	0.00898881	0.0233917	0.00279282	0.00478184	0.02964	0.00425966	0.028909	0.000743633	0.0131784	0.00543394	0.00998577	0	0.0158981	0.00112162	0.00164468	0.010847	0.00744676	0.00194609	0.00377237	0.0159354	0.00857897	0.00412911	0.00461507	0.00353692	0.00465125	0.00311401	0.0135002	0.000270636
Eggerthella	2.23174e-05	0.00570835	0.000378385	0	2.42518e-05	0.000660485	0	1.84505e-05	1.60187e-05	1.6046e-05	7.99808e-05	0.000539572	7.34943e-05	0.00282776	0.000850962	0	1.82e-05	0.00150522	0.000283086	0.000276619	0	0.000480471	0.000271771	0.000211578	0	3.42659e-05	0	0.00116144	0	1.95236e-05	0.000434715	0.00109259	0.00306933	0	0.0181012	0.000953164	0.000259385	0.00173387	4.80515e-05	6.43018e-05	0.00165156	3.99952e-05	0.000424709	0.000257414	6.31592e-05	0.000901952	0.000317756	0.000123402	0.0292625
Eisenbergiella	0	7.41345e-05	0	0	4.85037e-05	5.08066e-05	4.50796e-05	1.84505e-05	3.20374e-05	0.000112322	1.99952e-05	0	1.83736e-05	4.18927e-05	0	2.71363e-05	0	0	0	0	0	4.00392e-05	0	0	2.28796e-05	1.7133e-05	2.99976e-05	7.259e-05	0	0	0.0013973	2.54091e-05	0.00663222	0	0.000138045	0.000130826	4.71609e-05	0.000133375	7.20773e-05	6.43018e-05	0.00174084	1.99976e-05	2.35949e-05	0.000183867	8.42123e-05	0	0.00133458	7.40412e-05	0.000372124
Enorma	0	0	0	0	0	0	0	1.84505e-05	0	0	0	0	0	0	0	0	0	0	0	0	0	0	0	0	0	0	0	0	0	0	0.000621022	2.54091e-05	0	0	0	1.86895e-05	0.01113	0	0	0	0.00100433	0.000859897	4.71898e-05	0	0	0.000689728	4.23675e-05	0	0
Enterobacter	2.23174e-05	1.85336e-05	4.72981e-05	4.14044e-05	0	0	4.50796e-05	1.84505e-05	0.0201996	0	1.99952e-05	0.000237412	0.000293977	4.18927e-05	1.70192e-05	0.00293072	0.000182	0.034022	7.07714e-05	2.12784e-05	7.16418e-05	0.00128126	0.000465893	0	0.00121262	5.13989e-05	0.000989921	0	2.65583e-05	5.85709e-05	0.00111784	7.62273e-05	0	3.54472e-05	3.45113e-05	1.86895e-05	7.07414e-05	2.22291e-05	0.0472106	0.000192905	0.000111592	1.99976e-05	9.43797e-05	0	0	5.3056e-05	8.4735e-05	4.93608e-05	0
Enterococcus	0.00017854	0.00020387	7.09471e-05	0.000124213	0.000291022	0.000330243	0.000428256	0.000147604	9.61123e-05	0.000144414	1.99952e-05	0.000474824	0.000202109	0.000293249	0.000153173	0.000379908	5.46001e-05	0.000123716	2.35905e-05	0.00012767	0.000191045	0.000220216	0.000679427	0.000148104	0.000320315	0.000411191	0.000239981	0.000979965	0.000557724	0.00042952	0.00142835	0.00116882	0	0.000283577	3.45113e-05	0.00140171	0.000424448	0.000422354	0.000816876	0.000471546	0.000446369	0.000239971	0.000188759	0.000625149	0.000842123	0.000778155	0.00144049	0.00135742	0.000811908
Erysipelatoclostridium	8.92698e-05	0.00576396	2.3649e-05	4.14044e-05	0	0	0	9.22526e-05	0	1.6046e-05	0	0.000107914	0	6.28391e-05	0	0	1.82e-05	0.00795909	2.35905e-05	0	0.00078806	0.000760746	5.82366e-05	0	0	0	8.99928e-05	0.000381098	7.96749e-05	1.95236e-05	0.000652073	0.000152455	0.00652425	0	0	0.000261653	0.000117902	0.0037345	0	0	0.000379413	0.000219974	0.000283139	0.001949	0.000147372	0.00268817	0.000105919	9.87216e-05	0.129043
Erysipelotrichaceae_UCG-003	0.00379397	5.56009e-05	0.00591226	0.0119038	0.00167338	0.00607138	0.00166794	0.00645768	0.0164192	0.0269251	0.0464688	0.0294822	0.0462279	0.0198153	0.013258	0.0169059	0.0032942	6.18582e-05	0.00974286	0.00136182	0.000644776	0	0.011492	0.0034064	0.0100442	0.0754022	0.00236981	0.00898301	0.000106233	0.000527138	0.00760751	0.0455839	0.10118	0.00233951	0	0.00130826	0.00830032	2.22291e-05	0.00132142	0.00182188	0.0702361	0.000559933	0.00894248	0.000220641	0.00418956	0	0.00105919	0.00535564	3.38295e-05
Escherichia-Shigella	0.330611	0.018478	0.000709471	0.0110136	0.00123684	0.0197129	0.00108191	0.369047	0.0144969	0.149035	0.000399904	0.174821	0.00200272	0.000544605	0.000714808	0.0280861	0.0037492	0.0234236	0.00110875	0.0228743	0.0297075	0.0554143	0.0449587	0.0163338	0.0111424	0.175185	0.0229482	0.0279472	0.00833931	0.0779188	0.224034	0.148745	0.00012339	0.0410655	0.000707482	0.364782	0.0225193	0.0288979	0.0030753	0.104019	0.00243271	0.471723	0.00349205	0.00356703	0.00160003	0.00233447	0.025018	0.0213979	0.252943
Eubacterium	2.23174e-05	3.70672e-05	0	0	4.85037e-05	2.54033e-05	0	1.84505e-05	0	0	0	0	0	0	0	0	0	0	0	2.12784e-05	2.38806e-05	0	0	2.11578e-05	0	0	0	0	0	3.90472e-05	0.000527868	2.54091e-05	1.54238e-05	0	0	0	2.35805e-05	0.000644645	0	0	0.000468687	0.000239971	2.35949e-05	3.67735e-05	0	0	0.000381307	0.000468927	0
Faecalibacterium	0.145287	0.212988	0.10214	0.343181	0.127249	0.055684	0.228441	0.236314	0.00493376	0.000770206	0.289331	0.169275	0.0618087	0.224147	0.0142281	0.120458	0.125744	0.0152996	0.143855	0.133054	0.280597	0.232908	0.242051	0.164565	0.274693	0.00234722	0.138529	0.0935141	0.129472	0.281453	0.0610154	0.152302	0.0213465	0.120042	0.00174282	0.0454715	0.0709772	0.166274	0.26683	0.108456	0.0513324	0.0213574	0.0589873	0.184566	0.194825	0.209518	0.0327501	0.0459796	0.00167456
Faecalitalea	4.46349e-05	0.00240937	0	0	0.00053354	2.54033e-05	2.25398e-05	0.000553516	0.00237077	0.000882528	0.000139966	0.000107914	1.83736e-05	4.18927e-05	3.40385e-05	0	0	0.000247433	0	0	0	0.00052051	0	0	2.28796e-05	0.00130211	2.99976e-05	0	0	1.95236e-05	0.000155255	0.0116882	0.00172746	5.31707e-05	0	3.7379e-05	0	0.00257858	0	2.14339e-05	0	0.000759909	2.35949e-05	0	0.000484221	0	8.4735e-05	0	0.00137009
Family_XIII_AD3011_group	0.000111587	0	4.72981e-05	2.07022e-05	2.42518e-05	0.000127016	9.01591e-05	0.000332109	4.80561e-05	0	5.99856e-05	2.15829e-05	0	0.000104732	5.10577e-05	2.71363e-05	0.0001638	0	9.43619e-05	0.000340455	0.000119403	0	0.000116473	2.11578e-05	6.86389e-05	0.000342659	5.99952e-05	0	5.31166e-05	5.85709e-05	0.000124204	7.62273e-05	0	8.86179e-05	1.72557e-05	0.00072889	4.71609e-05	4.44583e-05	2.40258e-05	4.28679e-05	0.00029014	7.99904e-05	0.00014157	0	2.10531e-05	1.76853e-05	0.000275389	0.000370206	0
Flavonifractor	6.69523e-05	3.70672e-05	0.000875015	0	7.27555e-05	0.000406452	9.01591e-05	9.22526e-05	0	1.6046e-05	0.000179957	8.63316e-05	3.67471e-05	0.000209464	1.70192e-05	2.71363e-05	1.82e-05	0.000433008	0.000235905	8.51136e-05	2.38806e-05	0.00378371	7.76488e-05	8.4631e-05	6.86389e-05	1.7133e-05	0.000209983	0.00215955	7.96749e-05	1.95236e-05	0.000310511	7.62273e-05	0.00620035	1.77236e-05	0.0172211	1.86895e-05	0.000188644	0.000200062	0	0.000128604	0.00071419	3.99952e-05	0.000117975	0.00272124	0.000526327	0.0033779	0.000275389	0.000814453	0.000101488
Fournierella	0	0	0	0	0	0	0	0	0	0	0	0	0	0	0	0	0	0	0	2.12784e-05	0	0	0	0	0	0	0	1.81475e-05	0	0	0	0	0	0	0	5.60685e-05	0	0	0	0	0	0	0	1.83867e-05	0	0	0	0	0
Fusobacterium	0.000133905	0.000389206	0.000141894	0.000124213	0.000169763	2.54033e-05	0.000135239	0.0070112	0.0978423	0.0939972	7.99808e-05	0.000194246	9.18679e-05	0.000104732	0.0470072	0.000135682	9.10001e-05	0	2.35905e-05	2.12784e-05	0	0.0144942	3.88244e-05	0	2.28796e-05	0.000205596	0.000539957	0.00390171	0	0	0.000155255	0.00154995	1.54238e-05	0	0.000414136	1.86895e-05	9.43218e-05	0	4.80515e-05	0	2.23184e-05	0	0	0	0	0	0	0.000542969	0.000202977
GCA-900066575	2.23174e-05	0	9.45962e-05	0.000103511	9.70073e-05	5.08066e-05	4.50796e-05	3.6901e-05	0	0	0	4.31658e-05	0	0	3.40385e-05	8.14089e-05	0	0	2.35905e-05	2.12784e-05	4.77612e-05	0	3.88244e-05	0	0.00064063	0	0.000269978	0	2.65583e-05	0.000136665	0	0	0	5.31707e-05	0	0	0.000188644	0	0.000120129	0.000150038	0	7.99904e-05	0.000212354	1.83867e-05	0	3.53707e-05	4.23675e-05	2.46804e-05	0
GCA-900066755	0.000156222	0	9.45962e-05	0.000331236	0.00254644	2.54033e-05	0.000540955	9.22526e-05	0	0	0.00045989	0.000280578	0	0.000858801	5.10577e-05	5.42726e-05	0	0	0.000707714	6.38352e-05	0.000167164	0.000360353	0.000892961	0.000148104	0.000251676	0	0.0012299	0.000544425	0	9.76181e-05	0	0.000254091	0	8.86179e-05	0	5.60685e-05	0.00297114	0.000288979	9.6103e-05	0.000150038	0.000178548	0.000399952	0.00115615	0.000294188	0.000210531	3.53707e-05	8.4735e-05	7.40412e-05	0
Gemella	4.46349e-05	0	0	2.07022e-05	0	5.08066e-05	2.25398e-05	1.84505e-05	9.61123e-05	0.000176506	0	0	1.83736e-05	0	0	2.71363e-05	0	2.06194e-05	2.35905e-05	2.12784e-05	0	2.00196e-05	0	0	2.28796e-05	0.000753851	0	0.00014518	0	0	6.21022e-05	0.000101636	6.16951e-05	8.86179e-05	1.72557e-05	0	2.35805e-05	0	0	6.43018e-05	6.69553e-05	0	0	3.67735e-05	0	0	0	0	0.000186062
Gordonibacter	0	3.70672e-05	7.09471e-05	2.07022e-05	0	0.000127016	4.50796e-05	3.6901e-05	0	0	0	8.63316e-05	0	0	3.40385e-05	0.000135682	1.82e-05	0	0	0.000148949	2.38806e-05	0.000120118	1.94122e-05	0	0	0	0	0	0	0	0	0	0	0	8.62783e-05	0.000429858	0.000377287	0.000155604	0	0	0	1.99976e-05	7.07848e-05	9.19337e-05	6.31592e-05	0	0.000423675	0	0
Granulicatella	0	1.85336e-05	2.3649e-05	0.000103511	0	2.54033e-05	6.76193e-05	0	0.000784917	0.000272781	0	0	0.000440966	0	5.10577e-05	2.71363e-05	0	6.18582e-05	0	6.38352e-05	2.38806e-05	0.000120118	0.000116473	4.23155e-05	0	0.000325526	0	7.259e-05	2.65583e-05	0	0.000621022	0.000203273	0.000185085	0.000194959	0	1.86895e-05	0	0.000155604	0	0.000171471	0	1.99976e-05	0	1.83867e-05	2.10531e-05	8.84267e-05	0	0	0.000253721
Haemophilus	0	0.00020387	0	0.000144916	0	2.54033e-05	4.50796e-05	3.6901e-05	0.000112131	3.20919e-05	1.99952e-05	0.00425183	0.00589792	4.18927e-05	5.10577e-05	5.42726e-05	0.0024206	0	0	0	0	6.00589e-05	0	0.000296209	0.000732148	3.42659e-05	0.00062995	1.81475e-05	2.65583e-05	0.00197189	3.10511e-05	0.0002795	0.00094085	0.0147283	1.72557e-05	1.86895e-05	2.35805e-05	0.000755791	0.00180193	0.00158611	6.69553e-05	0	0.000212354	0.00649052	0.000168425	8.84267e-05	4.23675e-05	0	8.45737e-05
Holdemanella	0.00890466	1.85336e-05	9.45962e-05	0.0102476	0.0696755	0.000787502	4.50796e-05	0.0672153	4.80561e-05	1.6046e-05	1.99952e-05	0	1.83736e-05	6.28391e-05	1.70192e-05	2.71363e-05	0.029848	6.18582e-05	2.35905e-05	2.12784e-05	0.0124418	4.00392e-05	0.0268859	0	6.86389e-05	0.0389432	0.0279578	1.81475e-05	0.00151382	0.0263764	0.0988977	0.000381136	0	0	3.45113e-05	1.86895e-05	4.71609e-05	6.66874e-05	0.0401951	0.000471546	8.92738e-05	7.99904e-05	0.000188759	7.3547e-05	0.000147372	0.0730581	6.35512e-05	0.0924527	5.07442e-05
Holdemania	4.46349e-05	0.000259471	2.3649e-05	6.21067e-05	4.85037e-05	0.000254033	4.50796e-05	0.000147604	0	0	9.9976e-05	2.15829e-05	0	0.000146624	3.40385e-05	0	0.0001274	0	4.71809e-05	0.00012767	4.77612e-05	0	1.94122e-05	2.11578e-05	2.28796e-05	1.7133e-05	8.99928e-05	0	2.65583e-05	3.90472e-05	9.31532e-05	0.000152455	0	0	1.72557e-05	0	0.000212224	0.00026675	0	8.57357e-05	0.00285676	7.99904e-05	0.00014157	0	0.000210531	0	6.35512e-05	0.000123402	3.38295e-05
Hungatella	2.23174e-05	1.85336e-05	4.72981e-05	6.21067e-05	7.27555e-05	0.000127016	0.000202858	1.84505e-05	1.60187e-05	0.000513471	1.99952e-05	0	3.67471e-05	0	0	0.000135682	7.28001e-05	0	0.000117952	0.00168099	0.000262687	0.000220216	3.88244e-05	6.34733e-05	9.15185e-05	1.7133e-05	0.000269978	5.44425e-05	2.65583e-05	3.90472e-05	3.10511e-05	0	0.000154238	0	0.000207068	0.000803648	2.35805e-05	6.66874e-05	4.80515e-05	0	0.000379413	5.99928e-05	0.000306734	0.000349348	0.000357902	0.000636672	0.00160996	0	1.69147e-05
Intestinimonas	0	0	0	0	0	0.000127016	0	0	0	0	0	0	0	0	0	0	0	0	0	0	0	0	0	2.11578e-05	0	0	2.99976e-05	0	0.000212466	3.90472e-05	0	0	0	0	0	5.60685e-05	0.000353707	4.44583e-05	4.80515e-05	0	0.000133911	0	4.71898e-05	0	0.000231584	0	0.00118629	4.93608e-05	0
Klebsiella	0.0017854	0.000296538	0.000212841	0.000517555	0.000339526	0.000279436	0.00277239	0.000258307	0.218271	0.00016046	0.000219947	0.00269786	0.0213868	6.28391e-05	0.000255289	0.0020895	0.0721631	0.00602087	0.000117952	4.25568e-05	0.000429851	0.00658645	0.00753193	2.11578e-05	0.0158098	0.00029126	0.0179386	3.6295e-05	0.000106233	0.000722374	0.0703307	0.00292204	0.000586103	0.000372195	0.00012079	9.34475e-05	9.43218e-05	6.66874e-05	0.0237134	0.00850927	0.00232112	0.000719914	0.000448304	7.3547e-05	6.31592e-05	5.3056e-05	0.00110155	0.000493608	5.07442e-05
Lachnoclostridium	0.00595876	0.0739677	0.0161287	0.0074321	0.0131687	0.001575	0.0203985	0.00784147	0.0190302	0.0833748	0.0440094	0.0234822	0.0281851	0.0133847	0.0319451	0.0130797	0.00586041	0.00536105	0.0191791	0.019491	0.0149493	0.011251	0.00306713	0.00327945	0.0135676	0.0120273	0.00824934	0.0516841	0.00682549	0.0046271	0.004254	0.0382407	0.0078507	0.00599057	0.0054873	0.00926999	0.0172137	0.00873605	0.00944212	0.00452256	0.00345936	0.00805903	0.0144165	0.0159229	0.0144214	0.00656126	0.0050841	0.016215	0.0289073
Lachnospira	0.000245492	0.00265031	0.00312167	0.000331236	0.00194015	0.00167662	0.00293017	0.000738021	0.00036843	0.000625792	0.0561265	0.00170505	0.00176386	0.00959343	0.000697789	0.00127541	0.0044772	0	0.000165133	0.000297898	0.00539701	0.000680667	0.00564895	0.000317366	0.00256252	0.000411191	0.00242981	1.81475e-05	5.31166e-05	0.00160094	0.000714175	0.000381136	0	8.86179e-05	0	0.000654132	0.00183928	0	0.000600644	0.0012003	0	5.99928e-05	0.00014157	0.000386122	0.0229057	3.53707e-05	0.000487226	2.46804e-05	0
Lachnospiraceae_FCS020_group	0.000200857	0	7.09471e-05	0.000476151	0.00106708	0.000812905	0.000338097	0.000276758	0.000176206	0	0.000419899	0.000258995	0	0.000607444	0.000646731	0.000759817	0.000819001	0	0.000920028	0.000489403	0.00040597	0	0.00147533	0.00124831	0.00183037	0.000890914	0.000269978	0	0.00047805	0.000800469	0.00186306	0.000559	0	0.000283577	3.45113e-05	9.34475e-05	0.000990379	0.000355666	0.00187401	0.00152181	0.000758827	0.00049994	0.000377519	0.000386122	0.00128424	0	6.35512e-05	0.00197443	1.69147e-05
Lachnospiraceae_FE2018_group	2.23174e-05	0.000852547	2.3649e-05	8.28089e-05	0.000242518	0.000177823	0.000135239	0.000147604	0	3.20919e-05	9.9976e-05	0	1.83736e-05	0.000146624	0.000153173	0	3.64e-05	0.000412388	2.35905e-05	4.25568e-05	4.77612e-05	8.00785e-05	3.88244e-05	6.34733e-05	0.000137278	0.000154197	5.99952e-05	0	0	0	0.00167676	7.62273e-05	0.000215933	3.54472e-05	0.000310602	0.000112137	0.00341917	0.00026675	0	0.000214339	4.46369e-05	0.000319962	9.43797e-05	0.000220641	0.000210531	7.07414e-05	0.000529594	0.000913174	6.7659e-05
Lachnospiraceae_NC2004_group	0	0	0	0.000393342	7.27555e-05	0	0	0	0	0	0	0	0	6.28391e-05	0	0.000678408	0	0	0.000448219	0	0.000214925	0	0	0.000740521	6.86389e-05	0	0.000899928	0	0.000239025	0	3.10511e-05	0	0	0	0	0.00074758	0	0.000155604	0.000408438	0	0	0.000119986	0.000259544	1.83867e-05	0	0	6.35512e-05	0	0
Lachnospiraceae_ND3007_group	0.000133905	0.00118615	0.00153719	0.000828089	0.00611146	0	0.000698733	0.000498164	0.000400468	0	0.00399904	0.000949647	0	0.00192706	0.000187212	8.14089e-05	0.0011648	0.000412388	0.00051899	8.51136e-05	0.00179104	0.000460451	0	0.00019042	0.00114398	0.00359792	0.00455964	1.81475e-05	0.000239025	0.000292854	3.10511e-05	0.0306942	0	0.0012052	5.1767e-05	0.000317721	0.00160347	2.22291e-05	0.000408438	0.000535848	2.23184e-05	0	2.35949e-05	0.000275801	0	0	6.35512e-05	2.46804e-05	0
Lachnospiraceae_NK4A136_group	0.000669523	0.00126029	0.000165543	0.00973004	0.00400155	0.00111774	0.00439526	0.00103323	0.000464543	0.0104299	0.00493881	0.00399283	0.00101055	0.00837854	0.000850962	0.00388049	0.0021294	0.00068044	0.000141543	0.000659631	0.00117015	0.000200196	0.00122297	0.00361798	0.00363786	0.00104511	0.0351272	1.81475e-05	0.00114201	0.00146427	0.000931532	0.000406545	0.00521323	0.00168374	0.000362369	7.4758e-05	0.012026	0.0249189	0.00146557	0.000407245	6.69553e-05	0.00239971	0.00266623	0.00165481	0.00141056	0.0095324	0.000211837	0.0013821	1.69147e-05
Lachnospiraceae_UCG-001	0	0	0.00411493	0.000124213	0.00140661	0	0.00126223	0	0	0	0	4.31658e-05	0	0.000125678	1.70192e-05	0.000189954	0	0	0	0	0	0	0	0.000317366	4.57593e-05	0	0.00062995	0	0	0	0.000124204	0	0	0	0	0.000205584	0	0	7.20773e-05	0.00010717	4.46369e-05	0.000239971	0	0	0	0	0	0	0
Lachnospiraceae_UCG-004	0	0.000148269	0.000165543	4.14044e-05	0.00080031	5.08066e-05	2.25398e-05	1.84505e-05	3.20374e-05	0	0.00369911	0.000280578	1.83736e-05	6.28391e-05	1.70192e-05	8.14089e-05	1.82e-05	0	0.000401038	0.00117031	0.000358209	0.000160157	1.94122e-05	0.000253893	4.57593e-05	1.7133e-05	0.000299976	0.00112515	0	0.000351425	0	7.62273e-05	0	7.08943e-05	1.72557e-05	0.000224274	0.000188644	8.89166e-05	0.000240258	0.000557282	0.0016962	7.99904e-05	0.00014157	0.000275801	0.00147372	7.07414e-05	0.00016947	0.000172763	5.07442e-05
Lachnospiraceae_UCG-008	0.000401714	0.00281711	0.00293248	0.00260848	0.00213416	0.000533469	0.00227652	0.000221406	0.000224262	0	0.00101976	0.000453241	0.000349098	0.000607444	0.00173596	0.00051559	0.0011102	2.06194e-05	0.000731305	0.000446847	0.00200597	0.000120118	0.00166945	0.00118483	0.000571991	0.00197029	0.00281977	0	2.65583e-05	0.00111285	0.00102469	0.00114341	0	0.000921626	0.000103534	0.000598064	0.000919638	0.00215623	0.00177791	0.00135034	0.000535643	0.00137983	0.00521448	0.000239028	0.000610539	0.000212224	0.000593145	0.00192507	0
Lactobacillus	0.000133905	0.000296538	4.72981e-05	2.07022e-05	2.42518e-05	5.08066e-05	0.000157778	1.84505e-05	0.0307239	3.20919e-05	0	4.31658e-05	0	2.09464e-05	6.8077e-05	5.42726e-05	3.64e-05	0.000206194	2.35905e-05	0.0112988	0	6.00589e-05	0	0.000528944	0	0.00137064	0.00227982	0.117469	0.00188564	0.00109332	0.0101848	0.000177864	0.000586103	0.000159512	0.000189812	0.00037379	0.0215054	0.00162273	0.00766422	0.00368664	0.00466455	0.129005	0.00500212	0.000165481	2.10531e-05	3.53707e-05	0.00459687	0.00839133	0.000135318
Lactococcus	0	0	0	0	0	0	0	0	1.60187e-05	0	0	0	0	0	0	0	0	0	0	2.12784e-05	2.38806e-05	0	3.88244e-05	0	0.000137278	0	5.99952e-05	1.81475e-05	0	0	6.21022e-05	0	0	0	0	3.7379e-05	0	0	2.40258e-05	0	0	0	0	1.83867e-05	2.10531e-05	0	0	9.87216e-05	0
Marvinbryantia	0.000111587	3.70672e-05	0.000591226	0.000289831	0.000218266	0.00015242	0.000315557	9.22526e-05	4.80561e-05	0	0.000199952	4.31658e-05	0	0.000565552	0	0.000135682	0.0002184	6.18582e-05	9.43619e-05	0.000234062	0.000358209	0	0.000232946	0.000401997	0.000114398	0.000137064	0.00011999	0	7.96749e-05	5.85709e-05	0.000558919	0.000254091	0	0.000124065	0	0.000112137	0.00219298	0.000466812	0.000552592	0.000321509	2.23184e-05	0.000479942	0.000802227	7.3547e-05	0.000252637	1.76853e-05	4.23675e-05	0.000863814	0
Megamonas	0.00336993	7.41345e-05	2.3649e-05	8.28089e-05	4.85037e-05	5.08066e-05	4.50796e-05	1.84505e-05	0.0540311	3.20919e-05	3.99904e-05	0.000129497	0.0172528	4.18927e-05	0	0.000135682	0.000273	0.203019	0.000306676	0.000723466	0.00226866	0.000140137	0.000116473	0.000338524	0.000114398	0.000137064	0.000299976	0.000235918	0.0981861	1.95236e-05	9.31532e-05	0.000101636	0	0.00166602	0.0169623	0.000130826	4.71609e-05	0.000400124	0.00309932	0.000171471	0.0126322	0.000119986	2.35949e-05	0	0	0	0	0.00826793	0
Megasphaera	0	0	0	2.07022e-05	0	0	0	0	0	0	0	0	0	0	0	0	0	0	0	4.25568e-05	2.38806e-05	0	0	0	9.15185e-05	0	0	0	0	0	0.000496817	0.000101636	3.08475e-05	1.77236e-05	0	3.7379e-05	9.43218e-05	0	0.0101869	2.14339e-05	0	0	0	0.00101127	0	0	2.11837e-05	0.00194975	0
Merdibacter	0	0	0	0	0	0	0	0	0	0	0	0	0	0	0	0	0	0	0	0	0	0	0	0	0	0	0	0	0	0	0	0	0	0	0	0	0	0	0	0	0	1.99976e-05	0	0	0	0.000955008	0.000127102	0	0
Morganella	0	0	0	0	0	0	0	0	0	0	0	0	0	0	0	0	0	0	0	0	0	0	0	0	0	0	0	1.81475e-05	0	0	0	0	0	0	0	1.86895e-05	0	0	0	0	0	0	0	0	0	0	0	0	0
Negativibacillus	0	0	0	6.21067e-05	0.00109133	2.54033e-05	0.000473335	0	0	0	0	0	0	0	0	0	0	0	0	0	0	0	0	0	0	0.0189662	0.00107991	1.81475e-05	2.65583e-05	0.000409996	0	0	0	0.000159512	0	0	0	0	0.000408438	0	0	0	0	0.000864177	0	0	2.11837e-05	0	1.69147e-05
Nicotiana_otophora	2.23174e-05	3.70672e-05	0	0	0	0	0	0	1.60187e-05	3.20919e-05	1.99952e-05	2.15829e-05	5.51207e-05	0.000858801	5.10577e-05	0	1.82e-05	0	0	4.25568e-05	0	0.000220216	1.94122e-05	0.000571259	9.15185e-05	5.13989e-05	0	0	0	0	0.000434715	0.000914727	0.000385594	0.000106341	3.45113e-05	0.000224274	0.00049519	6.66874e-05	0.000456489	4.28679e-05	0.00118288	0.000739911	0.00108537	0.000661923	0.000884229	0.00049519	0.00135576	0.000839133	0.00064276
Odoribacter	6.69523e-05	0.00040774	0.000118245	2.07022e-05	0.000194015	0.000812905	0.000180318	7.38021e-05	0	0	1.99952e-05	4.31658e-05	0	8.37854e-05	3.40385e-05	2.71363e-05	9.10001e-05	0	0.000165133	0	4.77612e-05	0.00052051	0.000116473	0.000592417	0.000228796	1.7133e-05	2.99976e-05	0	0.000371816	0	0	0	1.54238e-05	0	1.72557e-05	0.000224274	0.000306546	0	4.80515e-05	4.28679e-05	0.00401732	1.99976e-05	9.43797e-05	0	0	0.000424448	4.23675e-05	9.87216e-05	0
Olsenella	0.000245492	1.85336e-05	0	0	0	5.08066e-05	0	0	6.40748e-05	0	0	0	0	0	3.40385e-05	0	0	0	0	0	0	6.00589e-05	1.94122e-05	2.11578e-05	0	0	0	1.81475e-05	2.65583e-05	0	0	0	0	1.77236e-05	0	1.86895e-05	0.000966799	0	9.6103e-05	0	2.23184e-05	0	0	7.3547e-05	0.000842123	0	0.000127102	0.00932919	0.000135318
Oribacterium	0	7.41345e-05	0	2.07022e-05	0	0	4.50796e-05	1.84505e-05	8.00935e-05	0	0	0	0.000165362	0	1.70192e-05	0	0	0	0	0	0	0	0	0	0	3.42659e-05	0	0	0	0	3.10511e-05	2.54091e-05	3.08475e-05	1.77236e-05	0	0	0	0	2.40258e-05	0	0	0	0	0	0	0	0	0	0
Oscillibacter	0.000379397	1.85336e-05	0.000165543	2.07022e-05	4.85037e-05	0.000787502	0.000180318	1.84505e-05	0	0	5.99856e-05	0.00015108	1.83736e-05	8.37854e-05	0	0.000135682	3.64e-05	0	4.71809e-05	0.00140437	9.55224e-05	0	0	0.000528944	4.57593e-05	0	8.99928e-05	1.81475e-05	0.000292141	1.95236e-05	0.000186306	0	0.000709493	0	0.000586692	0.000205584	7.07414e-05	0.000111146	4.80515e-05	8.57357e-05	0.00238807	9.9988e-05	0.000306734	0.000220641	0.000421061	0.000247595	0.000487226	0.000148082	1.69147e-05
Parabacteroides	0.00247724	0.000741345	0.0050609	4.14044e-05	0.00259495	0.00401372	0.00112699	0.00129154	0.000144168	0.0137835	0.00269935	0.00388492	0.000238856	0.00609539	0.00405058	0.00412472	0.0002366	0.00068044	0.013942	0.00691548	0.000310448	0.0100298	0.00176651	0.00315251	0.00180749	0.00138777	0.000899928	0.000181475	0.000823308	0.000780945	0.000652073	0.00411627	0.0310172	0.00049626	0.000362369	0.00072889	0.0370921	0.000822478	0.00403633	0.00902368	0.015422	0.000519938	0.037044	0.0248589	0.00290532	0.00394383	0.0184087	0.00592329	8.45737e-05
Paraeggerthella	0	0	0	0	0	0	0	0	0	0	0	0	0	0	0	0	0	0	0	0	0	0	9.7061e-05	0	0	0	0	0	0	0	0	0	0	0	0	0	0	0	0	0	0	0	0	0	0	0	0	0	0
Paraprevotella	0.00629352	1.85336e-05	2.3649e-05	0.00175969	0	0.000304839	0.00365144	0	4.80561e-05	0	0	2.15829e-05	0	2.09464e-05	0	0.0113158	1.82e-05	0	0	0.0042344	0.000334328	0	0.000951198	0	0.0010067	1.7133e-05	0.000989921	0	0	0.000800469	0	0	0	0.000141789	0	0	0	2.22291e-05	0.000456489	0.000214339	0	5.99928e-05	0	0	0	0	0.00105919	0.000863814	0
Parasutterella	4.46349e-05	0.0102676	0.000945962	2.07022e-05	0.000776059	0	0.00687463	0	0.00036843	0	0.0012397	2.15829e-05	5.51207e-05	0.000125678	0.000357404	2.71363e-05	0.0001456	2.06194e-05	0	0.00117031	0	0	0	0.000253893	0.000343194	0.000256995	0.000239981	0.00491797	0.00015935	9.76181e-05	6.21022e-05	0	0	0	1.72557e-05	1.86895e-05	0	0	4.80515e-05	4.28679e-05	6.69553e-05	0	0	0.000220641	0	0	0	0.000123402	0
Parvimonas	0	0.000148269	0	0	0	0	0	0	9.61123e-05	0.000192551	1.99952e-05	0	0	0	0	0	1.82e-05	0	0	2.12784e-05	0	2.00196e-05	0	2.11578e-05	2.28796e-05	0.000188463	0	9.07375e-05	0	0	0	2.54091e-05	0	3.54472e-05	0	0	0	2.22291e-05	0	0	2.23184e-05	0	0	1.83867e-05	0	0	2.11837e-05	0	1.69147e-05
Peptococcus	2.23174e-05	0	0	0	0	0	0	0	1.60187e-05	0	0	0	0	0	0	0	0	0	0	0	0	0	0	0	0	0	0	1.81475e-05	0	0	0.01034	2.54091e-05	0	0	0	0	0	0	0	0	0	0	0	0	0	0	0	0	1.69147e-05
Peptostreptococcus	0	0	0	0	0	0.000101613	0	0	4.80561e-05	0	0	0	0	0	0	0	0	0	0	8.51136e-05	0	2.00196e-05	0	0	0	3.42659e-05	0	9.07375e-05	0	0	0	0	0	5.31707e-05	0	0	0	0	4.80515e-05	0	0	0.000159981	0	7.3547e-05	2.10531e-05	0	0	2.46804e-05	0
Phascolarctobacterium	0.000334762	0.00646823	0	0.000600364	0.00405006	0	0.015868	0.00771232	0.000352412	0.00277595	0.0204751	0.0306045	7.34943e-05	0.00724744	6.8077e-05	0.00138395	0.0020202	0.000597963	0.00360934	4.25568e-05	0.0503642	0.0130728	0.0123462	0.00105789	0.00118974	0.0181438	0.000659947	0.000399245	0.0100656	0.0028895	0.00027946	0.0244435	0.000231357	0	0.00798937	0.00130826	0.00358423	6.66874e-05	0.00413243	0.0216911	0.000602598	0.000319962	0.00778632	1.83867e-05	0.0235584	1.76853e-05	0.00633394	0.00064169	6.7659e-05
Prevotella	0	7.41345e-05	0	6.21067e-05	0	5.08066e-05	0	0	0	0	0	0	0	0	0	0	0	0	0.00809153	0	0	6.00589e-05	1.94122e-05	0	0	0	0	9.07375e-05	0	0	0	0	9.25426e-05	0	0	0	0	0	0	0	0	1.99976e-05	0	0	0	8.84267e-05	0	0	0
Prevotella_2	0	3.70672e-05	2.3649e-05	2.07022e-05	9.70073e-05	2.54033e-05	4.50796e-05	0.0481559	6.40748e-05	9.62757e-05	9.9976e-05	0.00015108	0.226583	6.28391e-05	8.50962e-05	0.000108545	0.031031	2.06194e-05	2.35905e-05	0	0.0184597	8.00785e-05	0.0375238	6.34733e-05	4.57593e-05	0.00092518	5.99952e-05	1.81475e-05	7.96749e-05	0.026435	0.00378823	0.000304909	0	0.00583106	0.000155301	0.000112137	0.000400868	0.00026675	0.000240258	0.000214339	0.000245503	0.000159981	0.00014157	0.000147094	0.000189478	0.000123797	0.000148286	0.000197443	0.000118403
Prevotella_9	0.0282985	0.000296538	0.000331087	0.250518	0.277514	0.000381049	0.000383176	0.000332109	0.14553	0.000176506	0.000379909	0.184555	0.00156175	0.000335142	0.0660857	0.000461317	0.300173	0.000247433	0.0405284	0.00012767	0.150639	0.000180177	0.163082	0.148697	0.169813	0.0219302	0.0429566	0.000254065	0.0417762	0.168626	0.0266418	0.00144832	0	0.23147	0.000690226	0.00115875	0.00110828	0.000933624	0.0197972	0.303312	0.00129447	0.000799904	0.000519088	0.00073547	0.000736858	0.0287033	0.000444859	0.00594797	0.00032138
Pseudomonas	0	0	0	0	0	0	0	0	0	0	0	0	0	0	0	0	0	0	0	0	0	0	0	0	0	0	0	0	0	0	0	2.54091e-05	0	0	1.72557e-05	0	0	0	0	0	0	0	0	0	0	0	0	0	0
Pseudopropionibacterium	0	0	0	0	0	0	0	0	0	3.20919e-05	0	0	1.83736e-05	0	0	0	0	0	0	0	2.38806e-05	2.00196e-05	0	0	0	0	0	1.81475e-05	0	0	0	5.08182e-05	0	0	0	0	2.35805e-05	0	0	0	0	0	0	1.83867e-05	0	0	0	0	1.69147e-05
Pyramidobacter	0	0	0	0	0	0.000711292	0	0	0	0	0	0	0	2.09464e-05	0	0	0	0	0	6.38352e-05	0	2.00196e-05	0	0	0	0	0	0	0	1.95236e-05	0	0	0	0	0	5.60685e-05	0	0	7.20773e-05	0	0.000446369	3.99952e-05	0	9.19337e-05	0	0	0.0102318	0	0
Raoultella	2.23174e-05	0.000333605	0.000118245	0.000227724	9.70073e-05	0.000177823	0.000202858	7.38021e-05	0.0829609	0.000192551	3.99904e-05	0.000884898	0.000165362	0	0	0	0.000746201	0	2.35905e-05	0	7.16418e-05	0.000200196	0.000757076	4.23155e-05	0.00203629	3.42659e-05	0.00167987	0	5.31166e-05	5.85709e-05	0.000341562	0.000355727	1.54238e-05	0.00049626	8.62783e-05	0	4.71609e-05	0	0.00497333	2.14339e-05	6.69553e-05	0	0.000990987	0	0	0	0.000254205	2.46804e-05	1.69147e-05
Raoultibacter	0	0	0	8.28089e-05	0	5.08066e-05	4.50796e-05	0	0	0	0	0	0	2.09464e-05	0	0	3.64e-05	0	0	2.12784e-05	0	0	3.88244e-05	0	0	0	0	0	0	0	0.000124204	0	0.000215933	0	0.000431391	0.000112137	2.35805e-05	0.000177833	0	2.14339e-05	0	0	2.35949e-05	0	0	0	0	4.93608e-05	6.7659e-05
Rhodococcus	0	7.41345e-05	2.3649e-05	2.07022e-05	0	0	0	0	9.61123e-05	4.81379e-05	0	0	0	2.09464e-05	3.40385e-05	0	0	0	0	0	0	4.00392e-05	1.94122e-05	2.11578e-05	0	0.00017133	0	1.81475e-05	0	0	0	5.08182e-05	0.000107966	1.77236e-05	0	0	0	2.22291e-05	0	0	2.23184e-05	0	4.71898e-05	0	0	7.07414e-05	2.11837e-05	0	1.69147e-05
Robinsoniella	0	0	4.72981e-05	0	2.42518e-05	0	4.50796e-05	3.6901e-05	0	0	3.99904e-05	0	0	0.000146624	0	0	0	0	0	0	0	0	0	0	0	0	0	0	0	0	0	2.54091e-05	0	0	0	0	2.35805e-05	0	2.40258e-05	0	0	1.99976e-05	0	1.83867e-05	0	0	4.23675e-05	0.000148082	0
Romboutsia	0.000357079	0.00335459	0.00165543	0.00714227	0.00807586	0.0281468	0.00189334	0.000239857	0.057347	0.000320919	0.00495881	0.00861157	0.0120347	8.37854e-05	0.0139047	0.00472172	0.0352898	0.03229	0.00209955	0.0127458	0.0219224	0.01017	0.011065	0.0174975	0.00997552	0.13864	0.00650948	0.000617015	0.00342602	0.014057	0.00108679	0.000355727	1.54238e-05	0.0871646	0.000276091	0.0200725	0.04485	0.079936	0.00651098	0.000407245	0.0248404	0.00145982	0.0328441	0.000606763	0.0129266	5.3056e-05	0.0357158	0.017992	0.00358593
Roseburia	0.0273166	0.020665	0.0074258	0.0101441	0.0235243	0.00106694	0.0150115	0.0147973	0.000832973	9.62757e-05	0.0283732	0.0820366	0.00979311	0.0120442	0.00200827	0.0164717	0.0173628	0.000866015	0.00401038	0.00170227	0.0448478	0.0209205	0.0127538	0.0092671	0.041435	0.00107938	0.0729542	0.00014518	0.00100922	0.0248731	0.00558919	0.000457364	3.08475e-05	0.0147992	0.000207068	0.000766269	0.0182041	0.00142266	0.00848109	0.0374451	0.000156229	0.000459945	0.00620546	0.00746502	0.13815	8.84267e-05	0.00148286	0.00170295	0.000169147
Rothia	0.000111587	9.26681e-05	2.3649e-05	8.28089e-05	4.85037e-05	0.000101613	0.000653654	1.84505e-05	0.000977141	0.000176506	5.99856e-05	6.47487e-05	0.000532834	4.18927e-05	0.000119135	0.000135682	0.000273	0.000123716	2.35905e-05	8.51136e-05	0	0.000740726	0.000135885	0.000444313	0.000114398	0.000359792	0	0.000127033	2.65583e-05	0.000546661	0.00186306	0.00203273	0.00947019	0.00163057	8.62783e-05	5.60685e-05	0.00049519	0.00113369	0.000456489	0.00111456	0.000133911	0.000159981	0.000188759	0.0015261	6.31592e-05	0.000159168	0.00016947	4.93608e-05	0.00456698
Ruminiclostridium_5	0.000267809	0.000500408	0.00837176	0.000248427	0.000509288	0.000279436	0.000157778	0.000571966	0.00148974	1.6046e-05	0.000559866	0.00187771	0.00051446	0.000586498	0.000646731	0.00293072	0.000618801	8.24776e-05	0.00051899	0.00883054	0.000477612	0.000420412	0.00034942	0.00019042	0.000366074	0.00185036	0.000239981	0.00199623	0.000292141	0.00091761	0.00242198	0.000559	0	0.00108114	0	0.00104661	0.00183928	0.0110034	0.00127337	0.000643018	0.0056912	0.000719914	0.0469303	9.19337e-05	0.000715805	0.0033779	0.00148286	0.00167827	0.000456698
Ruminiclostridium_6	0	0	0	2.07022e-05	0	0	0	0.000239857	0	0	0	0	0	0.000293249	0	0	0	0	0	0	0.00081194	0	0	0.000126947	0	0	5.99952e-05	0	0	5.85709e-05	0	0	0	0	0	0	0	0	0	0	0	3.99952e-05	0.000731443	0	0	0	0	0	1.69147e-05
Ruminiclostridium_9	8.92698e-05	0	0.000212841	0.000103511	0.00198865	0.000635082	2.25398e-05	1.84505e-05	0	0	1.99952e-05	4.31658e-05	0	8.37854e-05	0	2.71363e-05	3.64e-05	0	0.000943619	4.25568e-05	0.000883582	0	0	0.000275051	0.000205917	1.7133e-05	0.00104992	0	0.00138103	1.95236e-05	0.00027946	0	0	3.54472e-05	0.00100083	1.86895e-05	0.000259385	0	0.000216232	0.00060015	0.00029014	0.000359957	0.000235949	0	0.000126318	0.000123797	0.000105919	0.00120934	1.69147e-05
Ruminococcaceae_NK4A214_group	0.00278968	0	0	0.00320884	0.00451084	0.00259113	0.000315557	5.53516e-05	1.60187e-05	0	0	0.00103598	3.67471e-05	0.00175949	0	0.00108545	0.0021294	4.12388e-05	0.00516631	4.25568e-05	0.00401194	4.00392e-05	5.82366e-05	0.00124831	0.00157869	5.13989e-05	0.00572954	1.81475e-05	0.0228401	0.000312378	0.00220463	2.54091e-05	0	0.000549431	6.90226e-05	0.00153254	0.0100217	4.44583e-05	0.00122531	0.00102883	4.46369e-05	0.000279966	0.00160445	0.0152426	0.000168425	0	0.00173707	0.00325781	0
Ruminococcaceae_UCG-002	0.00636047	0.000296538	0.00357101	0.00360219	0.0613086	0.114772	0.00380922	0.000442813	6.40748e-05	1.6046e-05	0.000119971	0.000496406	1.83736e-05	0.00261829	5.10577e-05	0.00572576	0.0013468	8.24776e-05	0.0195329	0.00895821	0.0148537	6.00589e-05	0.000427068	0.00478165	0.0107992	0.000239862	0.0260079	0.000235918	0.0456537	0.00353378	0.00254619	0.000406545	4.62713e-05	0.000992521	0.000155301	0.00902703	0.00528202	0.00202285	0.00523761	0.00730897	0.00549034	0.00511939	0.00894248	0.000165481	0.00938967	0.0316568	0.00192772	0.0331704	1.69147e-05
Ruminococcaceae_UCG-003	0.000312444	0	0	0.000434747	0.00111558	0.000685888	9.01591e-05	1.84505e-05	0	0	0.000219947	0.000129497	0	6.28391e-05	0	0.00021709	1.82e-05	0	0.000330267	0.000297898	0.000835821	0	9.7061e-05	6.34733e-05	0.00167021	0	0.00113991	0	0.00324011	0.00021476	0	0	0	1.77236e-05	0	3.7379e-05	0	4.44583e-05	0.000720773	0.000685886	0	5.99928e-05	0	0.000147094	0.000610539	0.00111418	2.11837e-05	0.00143146	0
Ruminococcaceae_UCG-004	0.000490984	0	0.00144259	0	0	0	0.000788892	0.000571966	1.60187e-05	0	7.99808e-05	8.63316e-05	0	0.00104732	0	0.000868362	0	2.06194e-05	0.000778485	0	0.00131343	0	0.0007959	0	0.000549111	0.000205596	0	0	0.00175285	0	0	0.000177864	0	0	1.72557e-05	0.00209322	2.35805e-05	0.00533499	4.80515e-05	0.00124317	4.46369e-05	0	0	3.67735e-05	0	0	0.00281744	0.00493608	0.000236806
Ruminococcaceae_UCG-005	0.00319139	0	0.00023649	0.000683173	0.00232818	0.00304839	0.000653654	1.84505e-05	0	0	0	0.00107914	0	0.00023041	0	0.00132968	0.0004186	0	0.0051899	0.00146821	0.00544478	0	0.000446481	0.00103673	0.000869426	0.000359792	0.0103792	9.07375e-05	0.126949	0.000605232	9.31532e-05	0	0	0.000567155	3.45113e-05	0.000803648	0.0039851	0.000422354	0.00136947	0.00312935	8.92738e-05	0.000319962	0.000424709	3.67735e-05	0.00130529	0.000424448	0.00699064	0.00370206	1.69147e-05
Ruminococcaceae_UCG-013	0.000557936	0.0109904	0.0135982	0.0119659	0.00276471	0.000406452	0.00101429	0.0137641	0.000192225	0.00121949	0.00563865	0.00015108	0.000753316	0.0581471	0.000833943	0.00271363	0.0043134	0	0.000896438	0.00302153	0.000835821	0.00382375	0.00291183	0.000126947	0.00183037	1.7133e-05	0.0111291	3.6295e-05	0.000212466	0.000976181	0.000186306	0.0131873	0.0566669	0.000336748	1.72557e-05	0.0003551	0.00200434	0.00909172	0.00141752	0.000621584	0.0241709	0.00151982	0.0163041	0.000919337	0.0130108	3.53707e-05	8.4735e-05	0.00631818	0
Ruminococcaceae_UCG-014	0.00676219	1.85336e-05	0.0024122	0.00146986	0.0189892	0.00106694	4.50796e-05	0.00359785	0	4.81379e-05	0.000119971	0.00321585	9.18679e-05	0.0140131	5.10577e-05	0.149575	0.0155792	0.00035053	0.115405	0.000212784	0.00389254	4.00392e-05	0.00370773	0.0441139	0.0373853	8.56648e-05	0.0522858	5.44425e-05	0.00523199	9.76181e-05	9.31532e-05	5.08182e-05	3.08475e-05	0.00154195	0.000103534	0.000224274	0.00389078	0.106833	0.0155206	0.00420105	0.000156229	0.000379954	0.000566278	9.19337e-05	4.21061e-05	1.76853e-05	0.07194	4.93608e-05	6.7659e-05
Ruminococcus_1	0.000981968	5.56009e-05	0.00766229	0.00449238	0.00880341	0.00137178	0.0124194	0.00123619	0	0	1.99952e-05	0.00848208	0.000128615	0.0019899	0	0.00968766	0.003367	0	0.00622788	0.00734105	0.0033194	4.00392e-05	0	0.00666469	0.0157412	6.85319e-05	0.00719942	5.44425e-05	0.00958755	0	0.00884956	2.54091e-05	0	0.000106341	5.1767e-05	0.0127275	0.0271411	0.00108923	0.00165778	0.000750188	4.46369e-05	0.00725913	0.000117975	0.000349348	0.0112002	5.3056e-05	0.0016947	0.012587	0
Ruminococcus_2	0.00622657	0.202888	0.000283789	0.000414044	0.0013581	0.0779119	0.0622323	0.0223989	0.000176206	1.6046e-05	3.99904e-05	0.0115468	0.000238856	0.00362372	0	0.00157391	3.64e-05	0.0320838	0.00254777	0.0130224	0.00274627	0.113771	0.000252359	0.0069609	0.019013	0.000137064	0.00434965	0.000308508	0.00926885	1.95236e-05	0.00447136	0.0008385	1.54238e-05	0.00108114	0.0344768	0.00841027	0.0455103	0.0146935	0.000192206	6.43018e-05	0.0112931	0.0267968	0.00176962	0.00503797	0.0117897	0.000123797	0.00940558	0.000123402	8.45737e-05
Scardovia	0	0	0	0	0	0	0	0	4.80561e-05	0	0	0	0	0	0	0	0	0	0	0	0	0	0	0	0	0	0	0	0	0	3.10511e-05	0	0	0	0	1.86895e-05	2.35805e-05	0.000133375	0	0	0.000334777	0	0	9.19337e-05	0	0	4.23675e-05	0	1.69147e-05
Sellimonas	2.23174e-05	1.85336e-05	9.45962e-05	0	2.42518e-05	2.54033e-05	4.50796e-05	0	0	1.6046e-05	1.99952e-05	2.15829e-05	0	0	0	2.71363e-05	0	0	2.35905e-05	8.51136e-05	0	4.00392e-05	0	4.23155e-05	0	0	0	3.6295e-05	5.31166e-05	1.95236e-05	0.0028567	2.54091e-05	0.00107966	0	0.00452098	0.00601802	0.000141483	0.00168941	4.80515e-05	4.28679e-05	0.000200866	0.00145982	0	7.3547e-05	2.10531e-05	8.84267e-05	2.11837e-05	7.40412e-05	3.38295e-05
Senegalimassilia	0	0	0	0	0	0	0	0	0	1.6046e-05	0	0	0	0	0	0	0	0	0	0	0	0	0	0	0	0	0	0	0.000690516	0.000741898	0.0125136	0.000101636	0	0.0181489	1.72557e-05	1.86895e-05	7.07414e-05	4.44583e-05	0	0.00143607	0	0.00423949	0	0	2.10531e-05	0	0	0	0
Slackia	2.23174e-05	0	0	0.000496853	0.00232818	0	0.00439526	0	0.000304355	0	0	0	1.83736e-05	0	0	0	0.000855401	0	0	0	0	0	0	0	0.0010067	0.0216047	2.99976e-05	0	0	0.000351425	6.21022e-05	0	0	0	0	0	0	0	0.000240258	0	2.23184e-05	1.99976e-05	0	1.83867e-05	0	0	0	0	0
Solobacterium	0	0.00066721	0	0.000103511	0	0	0	0	0.000961123	0.000144414	1.99952e-05	4.31658e-05	5.51207e-05	0	5.10577e-05	2.71363e-05	0	0.000123716	0	0.000446847	2.38806e-05	0.000240235	5.82366e-05	0	0	0.000222729	0	1.81475e-05	0	1.95236e-05	0	5.08182e-05	7.71188e-05	0.000106341	0	0	0	0	0	2.14339e-05	0	1.99976e-05	0	1.83867e-05	0	1.76853e-05	0	0.000123402	0.000169147
Staphylococcus	0	0	2.3649e-05	0	0	0	0	0	0	0	0	0	0	0	0	0	0	0	0	0	0	0	0	0	0	0.000256995	0.000569954	0.000417393	0.000371816	0.000195236	3.10511e-05	2.54091e-05	0	0	0	0	0	0	0	0	0.00272285	0	0	0	0	0	0	0	0
Stenotrophomonas	2.23174e-05	0	0	0	0	0	0	0	0	0	0	0	0	0	0	0	0	0	0	0	0	0	0	0	0	0	0	0	0	0	0	2.54091e-05	0	0	0	0	0	0	0	2.14339e-05	0	1.99976e-05	0	0	0	0	0	2.46804e-05	0
Streptococcus	0.000602571	0.00137149	0.012463	0.0148642	0.000630548	0.00147339	0.00103683	0.000848724	0.0207923	0.00166878	0.000139966	0.00105756	0.0312902	0.000356088	0.00524193	0.00116686	0.0014014	0.00325787	0.000967209	0.0209805	0.000286567	0.00274269	0.0106185	0.0739252	0.00626902	0.0129011	0.00062995	0.00199623	0.000185908	0.00111285	0.0382549	0.0756174	0.0105344	0.0140548	0.000724738	0.00741973	0.00412658	0.0395234	0.0454808	0.146608	0.00267821	0.0129184	0.00705488	0.104179	0.00778964	0.0136708	0.00279625	0.00510884	0.0098613
Subdoligranulum	0.0228754	0.000333605	0.0419298	0.0312189	0.107775	0.0601042	0.00421494	0.0149818	0.0259984	0.000208597	0.00295929	0.0212591	0.000422592	0.153076	0.000816924	0.0424683	0.0109928	0.222195	0.044468	0.00285131	0.0317373	0.000340334	0.0643514	0.0170743	0.0382319	0.0313876	0.0163187	0.00058072	0.014129	0.00995705	0.0889613	0.00607277	3.08475e-05	0.0276665	0.145068	0.0795238	0.0754575	0.00851376	0.0103551	0.0389026	0.0918404	0.0464544	0.231962	0.0393293	0.00082107	0.217052	0.016142	0.0516561	0.000456698
Sutterella	0.000379397	0	0	0	0	0	0	3.6901e-05	0	0	0.0356914	0	9.18679e-05	0.00138246	5.10577e-05	0.000407045	1.82e-05	0	4.71809e-05	0	0.000238806	0.000140137	0	0.000126947	2.28796e-05	5.13989e-05	0.000929926	0	0.00015935	0.00091761	0.000807328	0.000584409	0	0.000425366	0.000345113	0.000317721	0.000589511	0.000533499	0.000528567	0.00049298	0.000825782	0.00041995	0.000424709	0.000422895	0.00227373	0.00049519	0.000402491	0.000444247	0.000101488
Terrisporobacter	0	0	0	0	9.70073e-05	7.62098e-05	0.00171302	0	0.000544636	1.6046e-05	0	0.000949647	5.51207e-05	0	1.70192e-05	8.14089e-05	0.000182	0	0	2.12784e-05	0.000191045	6.00589e-05	7.76488e-05	0.000571259	0.00137278	1.7133e-05	8.99928e-05	1.81475e-05	2.65583e-05	0.000878563	0	0.000152455	0	0.000319024	3.45113e-05	0.00241094	0.00054235	0	0	0	0	0.000279966	0.000401114	0	0.000505274	0	0.000550777	7.40412e-05	0
Turicibacter	2.23174e-05	5.56009e-05	2.3649e-05	0.000289831	2.42518e-05	7.62098e-05	0.000383176	0	0.000688805	1.6046e-05	0	0.000776984	0.000808437	0	3.40385e-05	8.14089e-05	0.0013468	0	0	2.12784e-05	0.000286567	0.0019419	5.82366e-05	0.00311019	0.0023566	0.000154197	0.000149988	0	2.65583e-05	0.00158141	0	0.000127045	0	0.000868456	0	0.00274736	0.00115544	6.66874e-05	2.40258e-05	0	2.23184e-05	0.00117986	0.0152659	0.000165481	2.10531e-05	5.3056e-05	0.0058679	0.000123402	0
Tyzzerella_3	0.00267809	0	0	0	0.00026677	0	0.00227652	0.00070112	6.40748e-05	0	1.99952e-05	0	0	0.00303722	0.00151471	0	0.000764401	0	0	0.00140437	0	0.00190186	0	0	0	0	0	0	0	0	0	0	0	5.31707e-05	8.62783e-05	1.86895e-05	0	0	0	0	0.0266036	3.99952e-05	0.00165164	0.00198577	2.10531e-05	0	8.4735e-05	0	0
Tyzzerella_4	0.00017854	0.000537475	4.72981e-05	0.000144916	0.000169763	0.000508066	0.000135239	0.00741711	1.60187e-05	0	5.99856e-05	0.000215829	1.83736e-05	0.000356088	0	5.42726e-05	1.82e-05	0.0141037	0.000212314	8.51136e-05	0.000262687	0.000560549	0.000291183	2.11578e-05	0.000114398	0.000102798	0.000149988	0.00250436	0	0.000683327	0.000527868	0.000355727	0.161194	0.000389919	0.000379625	3.7379e-05	0.000377287	0.002134	0.00016818	0.0012646	0.000156229	0.000279966	0.000117975	0.00384283	0.00027369	0	0.00016947	0.000222124	0.00647835
UBA1819	0.000200857	0.000111202	0.000378385	0.00018632	0.00026677	0.00536009	0.000405716	0.000184505	3.20374e-05	0.000112322	5.99856e-05	0.00015108	1.83736e-05	0.000146624	1.70192e-05	2.71363e-05	0.000564201	0	0.000165133	0.00257469	7.16418e-05	0.000360353	7.76488e-05	0.000803995	0.000274556	0	2.99976e-05	5.44425e-05	0.000265583	0.000117142	0.00307406	2.54091e-05	0.00296136	1.77236e-05	0.00717835	0.000598064	0.00278249	0.00280087	0.000264283	0.000278641	0.0282551	0.000359957	0.00202916	0.00354864	0.000400008	0.000159168	0.0015676	0.00212251	0.000186062
Veillonella	2.23174e-05	5.56009e-05	0	6.21067e-05	0	0	0.000112699	1.84505e-05	4.80561e-05	0	5.99856e-05	0.00107914	0.00113916	0	0	0.00021709	0.0001092	0.000164955	0	0.000106392	0	0.000160157	0	0.000507786	0.000205917	1.7133e-05	0.000179986	0.000852933	0	0.000136665	9.31532e-05	0.000254091	0.000616951	0.000620325	1.72557e-05	1.86895e-05	4.71609e-05	0.000111146	0.00108116	0.00531561	0.000200866	3.99952e-05	0.00424709	0.00698696	0.00130529	0.000106112	2.11837e-05	4.93608e-05	0.000118403
Weissella	2.23174e-05	5.56009e-05	2.3649e-05	2.07022e-05	0	0	0	3.6901e-05	0.000432505	3.20919e-05	3.99904e-05	0	0.000551207	6.28391e-05	6.8077e-05	0	0.0027482	0.000226813	0	0	0	0	1.94122e-05	0	0	0	0.000149988	3.6295e-05	5.31166e-05	0	0.000155255	2.54091e-05	0	1.77236e-05	0	3.7379e-05	4.71609e-05	0	0.00607852	6.43018e-05	0	0	0	0	0	0	0	0.00957599	0
[Clostridium]_innocuum_group	0	0.00133442	9.45962e-05	2.07022e-05	2.42518e-05	0.000203226	6.76193e-05	0	0	3.20919e-05	0	4.31658e-05	3.67471e-05	2.09464e-05	1.70192e-05	2.71363e-05	0	8.24776e-05	2.35905e-05	0	0	0.000780765	0	4.23155e-05	0	0	0	0.00235918	2.65583e-05	0	0.000155255	5.08182e-05	0.00120305	0	0.00217421	1.86895e-05	0.000188644	0.000244521	0	0.000407245	0.000223184	5.99928e-05	0	0.000533216	2.10531e-05	0.00026528	0.000317756	0.000246804	0.000490528
[Eubacterium]_coprostanoligenes_group	0.00932869	5.56009e-05	0.000851366	0.00608645	0.0026677	0.0736695	0.00444034	0.00311814	6.40748e-05	1.6046e-05	7.99808e-05	0.00351801	1.83736e-05	0.00167571	1.70192e-05	0.00811376	0.00515061	0.000164955	0.0171975	0.00106392	0.0268418	4.00392e-05	0.0535194	0.00567028	0.0106161	0.00215875	0.0211483	7.259e-05	0.0232651	0.00402187	0.00403664	0.000863909	1.54238e-05	0.000230407	3.45113e-05	0.0189325	0.0259385	0.0287423	0.00295517	0.00332226	0.0158238	0.0219374	0.00596952	0.0227812	0.00842123	0.0494305	0.0263949	0.0434622	0.000101488
[Eubacterium]_eligens_group	0.00156222	3.70672e-05	0.0104056	4.14044e-05	0.00465635	0.00134637	2.25398e-05	0	0	1.6046e-05	0.00223946	0	0.00547532	0.00263924	0.000187212	0.000325636	0.0019838	0.000597963	0.00389243	2.12784e-05	0.000740299	2.00196e-05	0.0270024	0.000401997	0.000411833	3.42659e-05	0.000659947	0.00219585	5.31166e-05	0.000468567	0.00161466	0.000635227	0.00328526	0.000372195	0	0.000953164	0.000259385	0.000333437	0.000120129	0.000128604	0	0.000259969	0.00110896	0	0	1.76853e-05	0.000762615	4.93608e-05	0
[Eubacterium]_hallii_group	0.00236565	0.0118986	0.00640889	0.00310533	0.00504438	0.00708751	0.00169048	0.00153139	0.00733657	0.00561608	0.00135967	0.00112231	0.00753316	0.00471293	0.0131218	0.00415185	0.00531441	2.06194e-05	0.0022175	0.0353009	0.00312836	0.0108506	0.00298948	0.0094152	0.00331755	0.0246886	0.00218982	7.259e-05	0.00140759	0.00109332	0.00732805	0.0175577	0	0.00407642	0.00448647	0.00454155	0.0353471	0.00878051	0.00221037	0.00109313	0.000379413	0.0156581	0.0018404	0.00529538	0.00221057	8.84267e-05	0.0040461	0.0221383	0.0177943
[Eubacterium]_ruminantium_group	0.000981968	0.000148269	0.00075677	0.0056103	0.0159577	0.000457259	0.00173556	0.000332109	3.20374e-05	0	0.000939774	0.00129497	9.18679e-05	0.00404265	0.000119135	0.00721826	0.0004914	8.24776e-05	0.000306676	0.00655375	0.00914627	0.00108106	0.000465893	0.00799763	0.0245956	0.000137064	0.0439465	0.000127033	0.000717074	0.00070285	0.0043161	0.000304909	3.08475e-05	0.000230407	5.1767e-05	0.000541995	0.00139125	0.000866936	0.0229686	0.00304362	0.003995	0.000879894	0.00165164	0.000404508	0.00642119	0	0.000190654	0.000246804	0.000372124
[Eubacterium]_ventriosum_group	2.23174e-05	3.70672e-05	0.0012061	0.000227724	0.00419557	0.000736695	0.000698733	0.0019004	1.60187e-05	0	3.99904e-05	0.00172663	0.000183736	0.00134057	5.10577e-05	0.000244227	0.0022022	0	2.35905e-05	0	0.000453731	0.000600589	0.00232946	0.00131178	0.00105246	0.000154197	0.00011999	1.81475e-05	0.000106233	0.000234283	0.00543394	0.000177864	0	0.000513984	0	0.000523306	0.00209866	0.002134	0.00557398	0.000685886	0.00292372	0.000539935	0.000401114	0.00132385	0.000231584	1.76853e-05	0.0019489	0.00202379	0.0060724
[Ruminococcus]_gauvreauii_group	0.00160686	0.0141412	9.45962e-05	0.00267059	0.00162487	7.62098e-05	0.000540955	0.00322884	0.00360421	3.20919e-05	0.00105975	0.0013813	1.83736e-05	0.000356088	0.00571847	0.001194	0.0016198	4.12388e-05	0.00106157	0.00202145	0.00169552	2.00196e-05	0.000776488	0.00186188	0.000709269	0.00159337	0.00104992	3.6295e-05	7.96749e-05	0.00222569	0	0.00157536	0	0.00249903	0.000569437	0.00151385	0.00292398	6.66874e-05	0.000432464	0.00010717	0.000758827	1.99976e-05	0.00143929	9.19337e-05	0.00216847	0	0	0.00890962	0.000101488
[Ruminococcus]_gnavus_group	0.000446349	0.00559715	0.000780419	0.000124213	2.42518e-05	0.000711292	0.000676193	0.0144468	0.00112131	0.0173778	0.00307926	0.000690652	0.00635726	0.000544605	0.00199125	5.42726e-05	0.0001274	0.0251763	0.000165133	0.000148949	0.00219701	0.0291085	0.000194122	4.23155e-05	0.000183037	0.0127469	0.000389969	0.0165868	0.000132792	0.000449043	0.0154013	0.016643	0.0304928	0.000407642	0.02119	0.000242963	0.00365497	0.043947	0.000192206	0.000128604	0.00191939	0.000179978	0.000283139	0.00400831	0.00164214	0.00939092	0.000127102	0.000419567	0.02818
[Ruminococcus]_torques_group	0.0126094	0.00163096	0.00662173	0.0224826	0.00477761	0.0256827	0.0405716	0.00238012	0.0509876	0.00572841	0.00713829	0.0129497	0.000606328	0.0414528	0.0841091	0.0126455	0.0044954	0.00507237	0.0210427	0.00287258	0.0257672	0.00054053	0.0209069	0.0140064	0.0111424	0.117635	0.0277178	0.0499782	0.00124824	0.0105818	0.0167986	0.0783362	0.0040873	0.0743682	0.00398606	0.0100736	0.00294756	0.0163606	0.0032675	0.0283571	0.0717984	0.00623925	0.0065122	0.0112527	0.00522116	0.00185696	0.0133881	0.0294437	0.0394621
uncultured_bacterium_f_Coriobacteriales_Incertae_Sedis	8.92698e-05	0	0	0	9.70073e-05	0.000787502	0	0	0	0	0	0	0	0.00111016	0	0	0	0	0	0	0.000238806	0	7.76488e-05	0	2.28796e-05	0	0.00011999	0	0	3.90472e-05	6.21022e-05	0	0	7.08943e-05	0	0	0.00174495	0.0117814	0	0	0.00703031	0.000819902	0	0	0.000694751	8.84267e-05	0	0.000542969	0
uncultured_bacterium_f_Lachnospiraceae	0.000981968	0.00263177	0.00373655	0.00111792	0.00225542	0.00868792	0.00416986	0.00134689	0.000752879	0.00442868	0.0185555	0.00276261	0.00134127	0.00909072	0.00825434	0.00151963	0.0021658	0.000453627	0.00434065	0.00200017	0.00360597	0.00630618	0.00153356	0.00112136	0.000938065	0.00445457	0.00332973	0.000235918	0.000106233	0.00187427	0.00332247	0.00459904	0.00348577	0.0015774	0.0285581	0.00166336	0.00273533	0.00889166	0.000864927	0.00285071	0.0185913	0.000899892	0.00368081	0.00702374	0.0126529	0.00136177	0.000550777	0.00190039	0.0058525
uncultured_bacterium_f_Muribaculaceae	4.46349e-05	0.00872934	2.3649e-05	0	0.00955522	2.54033e-05	2.25398e-05	0	0	0	0	0	1.83736e-05	0	0	0	0	0.000144336	0.0276716	0.0165546	4.77612e-05	2.00196e-05	0	2.11578e-05	0	3.42659e-05	0.0957223	5.44425e-05	0.0558521	0.00763374	0.00493712	5.08182e-05	0	0	0	0	0	0	0	0	0	0	2.35949e-05	0	0	0	0	0	0
uncultured_bacterium_f_Peptostreptococcaceae	2.23174e-05	7.41345e-05	0.000662173	4.14044e-05	0.00160062	0.00177823	0.00272731	1.84505e-05	8.00935e-05	8.02298e-05	0	0.00166188	3.67471e-05	0	0.000119135	0.00363626	0.0003276	0.000103097	0.000330267	0.000361733	0.000501493	0.000360353	0.000194122	0.0107693	0.00153294	0.000137064	0.00350972	0.000834785	0.000106233	0.00158141	0.0342183	0.000940136	3.08475e-05	0.00113431	3.45113e-05	0.0213621	0.0229674	8.89166e-05	0.000288309	0.00010717	2.23184e-05	0.00551934	0.00195838	0.000937724	0.00145266	0	0.0146592	0.00143146	1.69147e-05
uncultured_bacterium_f_Prevotellaceae	0	0	0	0	0	0	0	1.84505e-05	0	1.6046e-05	1.99952e-05	0.0591371	0.00077169	6.28391e-05	0	0	1.82e-05	2.06194e-05	4.71809e-05	8.51136e-05	9.55224e-05	4.00392e-05	3.88244e-05	0.113131	6.86389e-05	0	0	0	0	0	0	0.000101636	0	0	0	0	0	0	0	0	0	0	0	0	0	0	0	0	0
uncultured_bacterium_f_Ruminococcaceae	6.69523e-05	0.000129735	4.72981e-05	0.000103511	0.00278896	0.0046488	0.000450796	1.84505e-05	0	4.81379e-05	0	0.000107914	0	0.000167571	0	0.00151963	5.46001e-05	2.06194e-05	0.00188724	0.00117031	0.000597015	0.000240235	1.94122e-05	0.000528944	0.000388954	0.000119931	0.00452964	0	0.000796749	0.00119094	0.00204937	5.08182e-05	0.00106424	0.000833008	0.013028	1.86895e-05	0.0043388	0.000377895	0.000840901	0.000428679	0.0016962	0.00513938	0.00117975	5.51602e-05	2.10531e-05	0.000123797	0.000932085	0.000370206	5.07442e-05
uncultured_bacterium_f_Saccharimonadaceae	6.69523e-05	0.00578249	2.3649e-05	0.000103511	0	7.62098e-05	0.000112699	5.53516e-05	0.00610313	0.000513471	9.9976e-05	4.31658e-05	0.000385845	6.28391e-05	0.000527597	2.71363e-05	0.0001274	0.000721679	0	0	0.000262687	0.000480471	0.000116473	2.11578e-05	0	0.00215875	0.000149988	0.000235918	2.65583e-05	1.95236e-05	0.000186306	0.000508182	0.000724917	0.000372195	0	7.4758e-05	0.000141483	0	2.40258e-05	0.000128604	0.000111592	7.99904e-05	4.71898e-05	0.000698696	6.31592e-05	3.53707e-05	0.00016947	0.000172763	0.00179296
uncultured_bacterium_o_Bacteroidales	0	0	0	0	0.00169763	0	2.25398e-05	0	0	0	0	0	0	0	0	0	0	0	0	0	0	0	0	0	0	0	0	0	0	0	0.000807328	2.54091e-05	0	0.000159512	0	0	0	0	0	0	0	0	0	0	0	0	0	0	0
uncultured_bacterium_o_Mollicutes_RF39	0.00196394	0	0.000543928	0.000351938	0.00092157	0	0	0	0	0	0	0.00030216	0	0	0	0.00192668	5.46001e-05	0	0	0	0.000238806	2.00196e-05	0	0	0	0	0.0012899	3.6295e-05	0.00185908	7.80945e-05	3.10511e-05	0	0	3.54472e-05	3.45113e-05	7.4758e-05	2.35805e-05	0.02872	0.0114122	0.00111456	4.46369e-05	0	0.00306734	0	0	0	2.11837e-05	0	0
[truncated: 10 more columns]
