# Supplementary material for: Analysis of gut microbiota and metabolites in patients with rheumatoid arthritis and identification of potential biomarkers
Source: Aging (Albany NY). 2021 Oct 20;13(20):23689–701. doi: 10.18632/aging.203641 (PMC8580343; doi:10.18632/aging.203641)
Supplement: Supplementary Table 1F [file aging-13-203641-s007.xls]

## Sheet: F-metabolites in the NEG
Supplementary Table 1F. The metabolites in the NEG that we detected.
	id	MS2 name	MS2 score	rt	mz	MEAN RA	MEAN HC	VIP	P-VALUE	Q-VALUE	FOLD CHANGE	LOG_FOLDCHANGE
up	1	Xanthosine	0.990003	35.136	283.068	1.27615	1.14073	0.0678958	0.636788	0.508437	1.11871	0.161838
	2	Xanthine	0.995852	58.2278	151.025	1.46597	0.727967	1.1095	0.0099411	0.141019	2.01378	1.00991
	3	Valsartan	0.955207	230.424	434.219	1.2199	0.452923	0.331006	0.429641	0.430828	2.69339	1.42943
	4	Ursolic Acid	0.616633	490.151	455.353	2.68434	0.846811	1.50859	0.0679665	0.28533	3.16994	1.66445
	5	UROCANATE	0.970933	35.7148	137.035	1.32469	0.630606	1.78373	0.00108416	0.0459619	2.10066	1.07085
	6	Uridine	0.9615	28.4596	243.05	2.25232	1.46817	1.35485	0.167733	0.346074	1.5341	0.617389
	7	Uric acid	0.99815	35.6161	167.02	0.204584	0.0843041	1.96347	0.00925002	0.135893	2.42674	1.27902
	8	Undecanoic acid	0.944708	346.077	185.154	1.15456	1.14251	0.340306	0.941745	0.60103	1.01055	0.015145
	9	Tyrosine	0.972004	57.1341	180.066	0.38605	0.282504	2.30341	0.25006	0.377046	1.36653	0.450513
	10	Tryptophan	0.99108	162.903	203.082	0.253128	0.183223	1.45999	0.156197	0.341141	1.38153	0.466263
	11	Triptolide Analog	0.988618	250.409	361.202	0.120289	0.0735843	0.106228	0.208069	0.362814	1.63471	0.709037
	12	Trichostatin A	0.503353	210.159	301.156	1.03295	0.970516	0.057524	0.89117	0.587723	1.06433	0.0899418
	13	Thymidine	0.907054	150.482	241.082	2.0413	0.458949	1.97732	0.00114865	0.0472578	4.44776	2.15308
	14	Sinapyl alcohol	0.620864	165.448	209.081	2.41323	1.44107	0.734403	0.570943	0.485098	1.67461	0.743825
	15	Silychristin	0.799325	279.694	481.113	3.65978	0.0043387	1.19294	0.240211	0.373961	843.52	9.72028
	16	Ser-Met-OH	0.813948	178.049	357.061	2.42342	1.99617	0.864004	0.642127	0.510283	1.21403	0.279808
	17	Rosuvastatin	0.895834	266.991	480.16	4.44002	0.0030046	0.809363	0.171788	0.347813	1477.74	10.5292
	18	RHODOMYRTOXIN	0.738131	271.158	427.179	1.11092	0.374524	1.89495	0.221096	0.367365	2.96621	1.56862
	19	Resveratrol	0.580518	260.594	227.071	2.80714	1.45129	0.757115	0.658752	0.515922	1.93423	0.951763
	20	REBAMIPIDE	0.975597	223.895	369.064	0.0402561	0.0124933	0.865782	0.355903	0.403027	3.22221	1.68805
	21	Quinolinic acid	0.962575	592.74	166.015	1.12046	1.07753	0.0932787	0.75156	0.546437	1.03984	0.0563594
	22	Pygenic acid B b	0.740081	338.214	487.343	3.61072	0.367259	2.09719	0.140362	0.334779	9.83152	3.29741
	23	Pygenic acid A b	0.549385	376.362	471.347	2.02379	0.573464	1.71	0.012873	0.159343	3.52907	1.81929
	24	Prunetin	0.985711	345.03	283.061	0.771145	0.31903	1.20225	0.17308	0.348428	2.41715	1.27331
	25	Prostratin	0.996492	234.116	389.197	0.0190742	0.00327537	1.46144	0.0223803	0.200208	5.82354	2.5419
	26	Probucol	0.98606	323.971	515.304	2.47572	0.95559	1.22686	0.337629	0.397966	2.59077	1.37338
	27	ponasterone A	0.880978	267.622	463.306	1.30543	1.00374	0.47255	0.228037	0.369861	1.30057	0.379145
	28	Phosphatidylethanolamine 18:2-18:2	0.957481	486.444	738.507	1.42476	0.772914	0.0366425	0.235686	0.372476	1.84336	0.882338
	29	Phenylalanine	0.993617	139.674	164.071	0.534221	0.316868	2.44776	0.133862	0.331845	1.68594	0.753555
	30	Phenylacetylglutamine	0.963929	162.461	263.104	0.634418	0.0601064	1.65178	0.151955	0.339495	10.5549	3.39984
	31	PHENYLACETIC ACID	0.448769	149.189	135.044	1.29671	0.993093	0.533154	0.196071	0.358303	1.30573	0.384852
	32	Phe Thr Arg Lys	0.732771	415.688	549.319	1.65669	0.937606	1.24054	0.118086	0.323662	1.76694	0.821251
	33	PGG2	0.857056	245.85	367.212	1.89452	1.7794	1.13489	0.907169	0.592027	1.0647	0.0904411
	34	Pantothenic Acid	0.994726	55.0844	218.103	0.612329	0.20783	1.61793	0.00735596	0.122437	2.9463	1.5589
	35	Palmitoleic acid	0.998794	440.361	253.217	1.59506	1.42137	0.0985339	0.773396	0.553153	1.1222	0.166332
	36	Palmitic acid	0.994613	499.687	255.233	1.36795	1.13543	0.915222	0.177829	0.350629	1.20479	0.268781
	37	OMDM-2	0.481865	440.098	430.332	1.0033	0.488635	0.872274	0.186549	0.354443	2.05327	1.03792
	38	Oleic Acid ethyl ester	0.992551	559.999	309.28	1.1687	0.757882	1.53714	0.0867898	0.302749	1.54206	0.624857
	39	Oleic acid	0.845342	510.145	281.248	1.15166	1.07496	0.446379	0.611559	0.499485	1.07135	0.0994267
	40	NORSTICTIC ACID	0.455305	174.253	371.044	2.35575	2.19464	1.01281	0.937741	0.600007	1.07341	0.102204
	41	NORLEUCINE	0.986866	57.746	130.086	0.48759	0.282972	2.7407	0.0400849	0.244317	1.7231	0.785007
	42	Nifedipine	0.837791	343.017	345.109	0.00693102	0.00367124	0.547338	0.243817	0.375114	1.88792	0.916801
	43	N-Acetyltryptophan	0.858595	180.538	245.093	0.536781	0.367799	0.708616	0.0363509	0.23597	1.45944	0.545416
	44	N-Acetylphenylalanine	0.983803	168.308	206.082	0.941976	0.694981	0.372557	0.574517	0.48641	1.3554	0.438717
	45	N-Acetyl-L-glutamic acid	0.996562	27.0731	188.056	1.11365	1.11229	0.485818	0.995863	0.614349	1.00122	0.00176262
	46	N-Acetylleucine	0.983255	150.329	172.097	0.946568	0.722936	0.119661	0.433678	0.432538	1.30934	0.388838
	47	N-Acetylaspartylglutamic acid	0.945063	27.486	303.083	0.418058	0.318604	1.03648	0.412567	0.424036	1.31215	0.391936
	48	Nabilone	0.843595	401.335	371.259	3.20081	1.39348	1.5784	0.348069	0.400865	2.29699	1.19974
	49	N4-Acetylsulfamethoxazole	0.972635	162.726	294.055	0.82993	0.632701	1.19934	0.503267	0.460237	1.31172	0.391465
	50	Myristic acid	0.99659	439.457	227.201	0.978618	0.500279	1.14947	0.0558173	0.270582	1.95614	0.968013
	51	Mycophenolic acid	0.997505	207.679	319.118	0.553977	0.509481	0.232029	0.787735	0.55754	1.08734	0.120798
	52	Mevalonic acid 5-phosphate	0.961927	267.818	227.034	2.57846	0.823851	0.252092	0.366342	0.405913	3.12977	1.64605
	53	Methyl Heptadecanoic acid	0.995899	552.072	283.264	2.03161	1.62484	0.385683	0.23506	0.372267	1.25034	0.322325
	54	Maslinic Acid	0.488633	468.026	471.348	5.0485	1.0835	1.13885	0.0652185	0.282176	4.65945	2.22016
	55	Malic acid	0.99216	26.6244	133.013	1.37967	0.710717	1.16577	0.0266636	0.213509	1.94124	0.956979
	56	Lysine	0.968429	32.4004	145.097	0.694446	0.502492	1.54508	0.0314209	0.225371	1.382	0.466762
	57	LOBARIC ACID	0.966794	247.687	455.174	0.0394464	0.00575078	1.60766	0.0318937	0.226463	6.85931	2.77806
	58	L-Methionine	0.614301	51.2352	148.043	0.973982	0.385465	2.63219	0.0552736	0.269855	2.52677	1.33729
	59	Lithocholic acid	0.996484	391.912	375.29	1.52416	1.23061	0.224702	0.396755	0.417438	1.23854	0.308635
	60	LITHOCHOL-11-ENIC ACID	0.979086	425.635	373.274	2.09432	0.219694	1.92256	0.0184338	0.184859	9.53291	3.25292
	61	L-Citrulline	0.962021	35.9844	174.087	3.29147	1.42992	1.59056	0.14326	0.336017	2.30185	1.20279
	62	Isoundecylic acid	0.999198	405.188	213.185	1.6884	1.08176	1.11648	0.205171	0.361757	1.56079	0.642278
	63	Isolauric acid	0.999146	413.512	199.169	1.11847	0.383813	0.793605	0.203588	0.36117	2.91409	1.54305
	64	Isokobusone	0.901829	424.813	221.154	1.22893	1.14116	1.0407	0.16495	0.344935	1.07691	0.1069
	65	Hypoxanthine	0.994996	57.4483	135.03	0.719285	0.563782	0.426088	0.236975	0.372904	1.27582	0.351427
	66	Histamine-trifluoromethyltoluide	0.793603	186.06	381.192	1.48091	1.35058	0.293732	0.859496	0.578927	1.0965	0.132907
	67	Heptadecanoic acid	0.645991	520.332	269.248	1.37348	0.70696	0.997104	0.101835	0.313203	1.9428	0.958137
	68	GLYCOCHOLATE	0.99435	303.881	464.309	1.57907	0.894921	0.810039	0.0181041	0.183406	1.76449	0.819248
	69	Glu Val Ile Glu	0.825349	188.988	487.237	1.7539	1.08269	1.6713	0.265509	0.381511	1.61994	0.695939
	70	Gliclazide	0.776728	234.39	322.117	2.54396	1.35987	1.40461	0.182448	0.352684	1.87073	0.903601
	71	Ginkgoic acid	0.56385	421.823	345.243	3.15682	1.19124	0.0724491	0.515799	0.464744	2.65002	1.406
	72	Gamma-Glu-Leu	0.761642	43.4549	259.13	1.19233	0.413733	3.73056	5.99435e-05	0.00858164	2.88188	1.52701
	73	Folinic acid	0.47903	250.2	472.158	0.933121	0.197049	2.46719	0.0135406	0.162882	4.73549	2.24351
	74	FAHFA 36:1	0.76893	510.152	563.504	1.21943	1.04177	0.50689	0.46547	0.445791	1.17054	0.227169
	75	Erythronolactone	0.988777	576.585	117.019	1.20831	1.12039	0.593571	0.565367	0.483039	1.07847	0.10899
	76	Equol	0.856419	298.888	241.087	2.77584	0.614003	0.168004	0.185318	0.353921	4.52089	2.17661
	77	Enterodiol	0.83042	265.348	301.144	2.76535	0.30389	2.07431	0.051968	0.265201	9.09985	3.18584
	78	ENOXOLONE	0.906418	397.197	469.332	1.8327	0.190602	1.69932	0.0453318	0.25446	9.61533	3.26534
	79	Dronedarone	0.914667	371.605	555.284	1.04784	1.01507	0.15997	0.944226	0.601661	1.03228	0.0458316
	80	Dodecylbenzenesulfonic acid	0.836751	376.294	325.184	1.0185	0.909596	0.112229	0.440808	0.435605	1.11972	0.163142
	81	Docosatrienoic Acid	0.974359	534.264	333.279	1.85189	0.809744	0.817221	0.106832	0.316682	2.287	1.19346
	82	Dihydrojasmonic Acid	0.418326	369.087	211.133	1.13026	1.1158	0.289928	0.700456	0.529814	1.01295	0.0185695
	83	D-Glu	0.997514	27.8654	146.045	0.940469	0.716095	1.0052	0.123528	0.326673	1.31333	0.39323
	84	DEOXYURIDINE	0.702746	128.769	227.067	1.78598	0.257856	2.28282	0.0016548	0.0584507	6.92627	2.79208
	85	Deoxyinosine	0.881069	139.454	251.078	2.3422	0.37748	1.99628	0.00199676	0.0648304	6.20485	2.6334
	86	Deoxyguanosine	0.823395	141.363	266.089	1.88262	0.486925	1.8389	0.0157406	0.17325	3.86634	1.95097
	87	Deoxycholate	0.997648	324.796	391.285	1.17253	1.17141	0.453956	0.996597	0.614524	1.00096	0.00138577
	88	Decanoic acid	0.994855	316.441	171.138	1.56902	0.842138	0.209518	0.375273	0.408866	1.86314	0.897738
	89	CYCLOLEUCINE	0.977032	43.161	128.071	1.1508	1.14654	0.0505663	0.986433	0.612093	1.00372	0.00535605
	90	Cyclohexylsulfamate	0.956292	164.025	178.053	1.70502	1.11636	0.472183	0.497689	0.458188	1.52731	0.61099
	91	CREATINE	0.991456	34.2097	130.061	0.900339	0.4851	1.24066	0.205519	0.361885	1.85599	0.892187
	92	Cortisone	0.950057	214.412	359.186	0.25748	0.249784	0.544834	0.881542	0.585088	1.03081	0.0437786
	93	Corosolic acid	0.698605	422.125	471.347	2.92256	0.22062	1.48085	0.149438	0.338523	13.247	3.7276
	94	Confertifoline	0.799022	427.233	233.154	1.03737	1.02957	0.47848	0.805619	0.563071	1.00758	0.0108906
	95	Combrestatin A4	0.399697	235.459	315.127	2.20573	0.663203	0.874655	0.285796	0.386773	3.32588	1.73374
	96	Cochlioquinone A	0.651401	296.185	531.299	1.35647	0.831629	0.933914	0.345888	0.40025	1.6311	0.705844
	97	Chrysin	0.671881	342.017	253.05	4.26795	0.0980378	1.31571	0.234914	0.372218	43.5337	5.44406
	98	Cholic acid	0.997633	224.93	407.28	0.834819	0.615781	0.669678	0.517588	0.465376	1.35571	0.439046
	99	Chitobiose	0.985174	34.047	423.162	1.63303	0.547369	1.23992	0.0151961	0.170851	2.98343	1.57697
	100	celecoxib carboxylic	0.592701	256.69	410.042	3.07998	0.00225243	2.41995	0.0363096	0.235872	1367.4	10.4172
	101	CELECOXIB	0.900795	391.911	380.068	2.01264	0.00168818	1.98253	0.151522	0.33933	1192.19	10.2194
	102	Butylparaben	0.79116	199.293	193.086	2.18439	1.53011	0.0268629	0.656875	0.515294	1.4276	0.513596
	103	Bufalin	0.789607	277.413	385.238	3.04143	1.03407	0.926214	0.453026	0.440731	2.94121	1.55641
	104	Asp Leu Ala Glu	0.911542	258.74	445.19	1.45726	0.671877	1.6321	0.0561618	0.271037	2.16895	1.11699
	105	Asn Glu Thr Glu	0.698854	169.882	490.169	0.145923	0.0525433	1.15508	0.150504	0.338938	2.77721	1.47363
	106	alpha-ESA	0.996283	442.274	277.217	1.78992	0.707396	0.70464	0.261396	0.380363	2.5303	1.33931
	107	alpha-CYANO-3-HYDROXYCINNAMIC ACID	0.994541	156.724	188.034	0.790137	0.562619	0.0407966	0.216033	0.365601	1.40439	0.489946
	108	alpha-CMBHC	0.945596	308.087	319.191	1.4435	1.26709	0.122888	0.648887	0.512596	1.13923	0.188058
	109	Adrenic Acid	0.987043	506.093	331.264	1.08743	0.774746	1.13728	0.301621	0.390472	1.40359	0.48912
	110	Adenine	0.994237	132.38	134.046	1.24978	1.01806	0.410328	0.526697	0.468556	1.22761	0.295853
	111	Acetyl-DL-Valine	0.933402	35.5436	158.081	1.22132	1.01469	0.281675	0.789475	0.558084	1.20364	0.267403
	112	9-HpOTrE	0.808688	439.848	309.204	0.856987	0.522442	0.952541	0.0514281	0.264401	1.64035	0.714001
	113	9,12-Octadecadiynoic Acid	0.951764	428.024	275.201	1.40053	0.50513	2.21557	0.0191899	0.18808	2.77261	1.47124
	114	7Z, 10Z, 13Z, 16Z, 19Z-docosapentaenoic acid	0.782469	480.609	329.248	1.08997	0.703711	1.15819	0.351326	0.401773	1.54889	0.631238
	115	7-Methylguanine	0.520484	137.357	164.057	1.26551	0.91597	1.79777	0.122992	0.326386	1.3816	0.466342
	116	6beta-Testosterone Enanthate	0.782444	339.867	415.281	0.863934	0.854515	0.267212	0.976468	0.609679	1.01102	0.015816
	117	6a,12a-Didehydroamorphigenin	0.416302	330.531	407.117	0.366152	0.206191	0.135478	0.452958	0.440703	1.77579	0.828458
	118	5-OXO-L-PROLINE	0.99829	28.1242	128.034	0.741104	0.607522	1.01399	0.259068	0.379701	1.21988	0.286739
	119	5-cis Carbaprostacyclin	0.688372	490.219	349.236	1.25744	0.639216	0.606848	0.0532566	0.267065	1.96716	0.976118
	120	5,8,11-Eicosatriynoic Acid	0.777903	428.382	299.201	0.830346	0.421314	0.707675	0.2083	0.362897	1.97085	0.978817
	121	5,6-DiHETE	0.970663	313.307	335.22	0.307713	0.295998	0.413199	0.871382	0.582271	1.03958	0.056001
	122	5,3',4'-Trihydroxyflavone	0.820341	270.783	269.054	4.56983	0.0656978	2.31561	0.00874671	0.131933	69.5584	6.12015
	123	5(Z),14(Z)-Eicosadienoic Acid	0.990115	521.149	307.264	1.03261	0.906387	1.06936	0.613828	0.500294	1.13926	0.188097
	124	4-PYRIDOXATE	0.997065	152.183	182.045	0.873343	0.664834	0.388557	0.161485	0.343472	1.31363	0.393553
	125	4-Methoxyphenylacetic acid	0.854424	134.552	165.055	1.62586	0.963077	1.34946	0.335459	0.39751	1.68819	0.755479
	126	4-IMIDAZOLEACETIC ACID	0.727459	150.307	125.034	1.64822	0.918107	1.74969	0.00704601	0.120222	1.79523	0.844171
	127	4-Hydroxybenzotriazole	0.9192	573.86	134.035	1.2359	1.1248	0.865894	0.456599	0.4422	1.09878	0.135904
	128	4-ACETOXYPHENOL	0.880287	59.5915	151.039	0.928026	0.467889	1.4289	0.127077	0.328525	1.98343	0.987999
	129	4`-Hydroxy Diclofenac	0.931423	245.18	310.004	4.18414	0.331881	1.86874	0.115642	0.322237	12.6074	3.6562
	130	3-Methyladipic acid	0.961428	34.8008	159.065	2.15186	1.22878	0.396149	0.283981	0.386327	1.75121	0.808353
	131	3-Hydroxy-3',4',5'-trimethoxyflavone	0.42338	164.698	327.087	1.45743	1.18093	0.13865	0.574161	0.486279	1.23414	0.303503
	132	3-beta-hydroxyandrost-5-en-17-one sulfate	0.831004	319.982	367.158	2.1826	0.996184	0.603946	0.419564	0.42686	2.19096	1.13156
	133	3,16-DIDEOXYMEXICANOLIDE-3beta-DIOL	0.870211	254.083	471.242	2.04247	0.33595	2.39014	0.00231281	0.0701811	6.07968	2.604
	134	3-(3-Hydroxyphenyl)propionic acid	0.977156	150.512	165.055	1.34985	1.16486	1.33063	0.692516	0.52711	1.15881	0.212638
	135	2-hydroxyhexadecanoic acid	0.977215	347.106	271.228	1.35377	1.18995	0.739067	0.815314	0.566011	1.13767	0.186084
	136	2-Hydroxyglutarate	0.989313	26.5403	147.029	0.715471	0.620899	0.581784	0.485133	0.453473	1.15231	0.204534
	137	20-ethyl-PGE2	0.649062	372.375	379.246	0.5085	0.464388	0.452445	0.781485	0.555586	1.09499	0.130919
	138	2,3-DIACETOXY-7,8-EPOXY-24,29-DINOR-1,3,5-FRIEDELATRIENE-20-CARBOXYLIC ACID	0.990915	297.192	551.304	1.62535	0.893693	1.26812	0.252371	0.377741	1.81869	0.862901
	139	1-Methyluric acid	0.989902	44.5496	181.036	0.915915	0.397759	2.37203	0.0169766	0.178337	2.30269	1.20332
	140	1-Hydroxybenzotriazole	0.680767	596.034	134.035	1.06983	1.04869	0.157241	0.856705	0.578134	1.02016	0.0287969
	141	18alpha-GLYCYRRHETINIC ACID	0.92316	467.405	469.331	3.44731	0.295411	1.31672	0.197418	0.358825	11.6696	3.54468
	142	17-Octadecynoic Acid	0.999467	456.698	279.233	1.92864	1.73261	0.918288	0.848389	0.575753	1.11314	0.154633
	143	15S-HEPE	0.998784	357.175	317.211	1.51969	1.38692	0.271412	0.741074	0.543132	1.09573	0.131893
	144	15-15-methyl PGF2alpha ethyl amide	0.990913	324.83	394.294	1.16748	1.16138	0.467726	0.981432	0.610885	1.00525	0.00755568
	145	15(R)-Iloprost	0.904169	442.341	359.22	0.8824	0.661051	0.410635	0.420204	0.427115	1.33484	0.41667
	146	13S-HpOTrE(gamma)	0.868362	339.43	293.212	0.583649	0.540527	1.01782	0.818439	0.566951	1.07978	0.110733
	147	12-oxo-ETE	0.980333	384.143	317.212	2.45683	0.523879	1.23221	0.285007	0.38658	4.6897	2.2295
	148	10Z-nonadecenoic acid	0.995317	540.11	295.264	1.30274	0.346182	1.57794	0.00509961	0.10384	3.76318	1.91195
	149	[8]-Dehydrogingerdione	0.640692	451.6	317.175	1.79493	0.0873251	0.570799	0.306956	0.391647	20.5546	4.36139
	150	(E)-C-HDMAPP	0.914609	28.129	259.013	0.677977	0.461507	0.547921	0.430469	0.431148	1.46905	0.554884
	151	(23R)-23,25-dihydroxyvitamin D3	0.994065	414.735	415.321	1.66827	1.2214	0.577303	0.251981	0.377624	1.36586	0.449815
	152	(+)-12-methyl myristic acid	0.999809	463.122	241.217	1.33349	0.993401	0.728339	0.18229	0.352615	1.34235	0.424764
down	153	Xylitol	0.983841	32.3804	151.06	0.0195955	0.0212297	0.380701	0.769438	0.551952	0.923024	-0.11556
	154	Valganciclovir	0.934943	236.564	353.16	0.0183181	0.0355648	0.428967	0.217996	0.366263	0.515063	-0.957179
	155	Trp derivative	0.923924	343.019	222.076	0.00668711	0.00696073	0.164125	0.94789	0.602588	0.960691	-0.0578551
	156	Tetradecanedioic acid	0.905478	254.657	257.176	1.60231	1.62923	0.914589	0.939206	0.600382	0.983477	-0.0240368
	157	Taurocholic acid	0.974305	268.365	514.284	0.014962	0.0421387	0.497326	0.0877138	0.303454	0.355065	-1.49385
	158	Taurine	0.997191	30.2416	124.006	0.61981	0.747467	0.210229	0.712114	0.533723	0.829214	-0.270184
	159	Sunitinib	0.928097	279.557	397.205	0.619427	0.94339	0.715301	0.28046	0.385449	0.656597	-0.60692
	160	SULOCTIDIL	0.482994	399.563	336.239	1.16442	1.54548	0.251468	0.547003	0.476095	0.753432	-0.40845
	161	SILDENAFIL	0.730498	188.069	473.186	0.161381	0.233034	0.571436	0.387208	0.41351	0.692522	-0.530069
	162	Sebacic acid	0.97739	158.532	201.112	1.36373	1.94598	0.524722	0.150887	0.339086	0.700792	-0.512941
	163	Rhapontigenin	0.61366	239.264	257.082	0.390428	3.77646	2.07293	0.0910414	0.305899	0.103385	-3.2739
	164	Quinic acid	0.974012	28.662	191.055	0.560412	0.589	0.761498	0.947142	0.602399	0.951463	-0.0717804
	165	Prostaglandin D2 methyl ester	0.530168	481.853	365.225	1.79299	1.82739	0.449541	0.968276	0.607673	0.981176	-0.0274167
	166	Pregnan-20-one, 17-(acetyloxy)-3-hydroxy-6-methyl-, (3b,5b,6a)-	0.983304	302.34	389.269	0.925968	1.10937	0.398501	0.407126	0.421801	0.83468	-0.260705
	167	Poncirin	0.992155	263.363	593.187	0.347642	0.524703	0.136312	0.737317	0.541935	0.66255	-0.593899
	168	Picrotoxinin	0.69646	202.651	291.087	0.331169	5.42423	0.221226	0.161275	0.343382	0.0610537	-4.03378
	169	Piceatannol	0.965482	239.26	243.066	0.150069	5.74638	0.976418	0.334571	0.397327	0.0261155	-5.25895
	170	Photobarbatusin I	0.9997	348.985	445.186	0.971172	0.97309	0.419527	0.990756	0.613131	0.998029	-0.00284635
	171	Phosphatidylethanolamine lyso 17:0	0.44861	431.063	466.293	1.19616	1.7924	1.49708	0.0385307	0.24097	0.66735	-0.583484
	172	Phosphatidylethanolamine lyso 16:0	0.988769	355.114	452.278	0.713672	1.09488	0.218554	0.416396	0.425589	0.651828	-0.617436
	173	Phosphatidylcholine lyso 18:2	0.712231	402.254	578.346	0.323287	0.731619	0.00657723	0.314128	0.393175	0.441879	-1.17828
	174	Phosphatidylcholine lyso 18:1	0.490214	429.32	580.362	0.923552	1.06631	0.555255	0.806295	0.563277	0.866124	-0.207355
	175	PGD2	0.985621	499.693	351.22	1.14014	1.18315	0.236716	0.528424	0.469151	0.963652	-0.0534152
	176	PG(16:0/0:0)[U]	0.875598	376.99	483.272	0.852292	1.22862	0.615513	0.151117	0.339174	0.693699	-0.527618
	177	Pelargonate	0.939154	285.264	157.122	0.911637	1.01702	0.950773	0.196754	0.358568	0.896378	-0.157821
	178	PE(18:1(9Z)/0:0)	0.688051	424.942	478.293	0.919097	1.01198	1.0191	0.567186	0.483713	0.908215	-0.138894
	179	Orotic acid	0.975116	29.1748	155.001	0.433708	0.908875	0.674586	0.166938	0.345752	0.477192	-1.06736
	180	N-omega-Acetylhistamine	0.995295	63.7839	152.082	1.70585	4.37846	0.160205	0.184588	0.353609	0.3896	-1.35993
	181	Naringin	0.990706	228.043	579.171	0.229728	0.286481	0.0173589	0.857625	0.578395	0.801896	-0.318512
	182	Naringenin	0.821303	287.862	271.061	0.135895	0.747739	0.184713	0.275573	0.3842	0.181741	-2.46004
	183	N-acetylaspartate	0.623115	26.6531	174.04	0.485753	0.699939	1.12623	0.16453	0.34476	0.693993	-0.527007
	184	Mundoserone	0.741499	252.088	341.1	0.00556219	0.00996596	0.889158	0.13495	0.332352	0.558119	-0.841355
	185	Methylsuccinic acid	0.985356	27.4065	131.034	1.20345	1.25409	0.394554	0.870362	0.581986	0.959619	-0.0594667
	186	Medicagenic acid	0.896243	289.572	501.322	0.40773	0.682961	0.350229	0.365031	0.405552	0.597003	-0.744189
	187	Maltotriose	0.677748	35.7413	503.161	0.31653	0.960829	1.02703	0.0985424	0.310924	0.329434	-1.60194
	188	maltotetraose	0.824304	35.9265	665.214	0.424717	0.649328	0.580611	0.202911	0.360916	0.654087	-0.612446
	189	Maltose	0.677118	34.5985	341.108	0.568312	1.82351	0.716771	0.0700648	0.287615	0.311658	-1.68196
	190	Lys-Gln-Ala-Gly-Asp-Val	0.662454	251.727	615.308	1.16083	1.16331	0.321771	0.99526	0.614206	0.99787	-0.00307678
	191	Lupulone	0.943283	324.519	413.267	0.60265	0.675337	0.794498	0.295187	0.389008	0.892369	-0.164288
	192	Losartan	0.74293	259.86	421.154	0.0131981	2.41789	0.137689	0.326626	0.395703	0.00545852	-7.51727
	193	Jatrorrhizine	0.567248	197.85	337.129	0.0102835	0.0268977	0.783512	0.322381	0.394863	0.382318	-1.38715
	194	Isosakuranetin	0.979807	342.262	285.077	0.375085	1.28025	0.017571	0.220266	0.367059	0.292977	-1.77114
	195	Isoquinoline N-oxide	0.996553	248.443	144.044	0.509261	0.740082	1.26422	0.146028	0.337161	0.688114	-0.53928
	196	Isopropylidene Azastreptonigrin	0.537443	34.0932	544.188	0.846617	0.914009	0.309282	0.897243	0.589367	0.926267	-0.1105
	197	Irbesartan	0.996163	276.475	427.225	0.00635392	0.0279494	0.244012	0.155139	0.340688	0.227337	-2.1371
	198	Inosine	0.973267	134.507	267.073	1.0508	1.37012	1.52185	0.286766	0.38701	0.766941	-0.382812
	199	Indolelactic acid	0.96553	165.316	204.066	0.15601	0.242395	0.36439	0.417216	0.425919	0.643618	-0.635724
	200	Indole-3-acetic acid	0.876708	166.135	174.055	0.850037	1.17771	0.182525	0.623099	0.503623	0.721771	-0.470387
	201	Histidine	0.956268	35.3718	154.061	0.220614	0.338757	0.436369	0.311299	0.39258	0.651245	-0.618728
	202	His Val Tyr Asp	0.817432	269.642	531.223	0.0411465	2.80601	0.0745605	0.148864	0.338297	0.0146637	-6.09161
	203	Hesperidin	0.798345	235.28	609.182	0.826483	0.868244	0.626749	0.965986	0.607108	0.951902	-0.0711153
	204	Heptanoic acid	0.99355	179.548	129.08	2.90291	3.09875	0.953022	0.768015	0.551519	0.936799	-0.0941883
	205	Glycocholic Acid	0.995672	264.532	464.301	0.0568873	0.227668	0.839296	0.149387	0.338503	0.24987	-2.00075
	206	Galangin	0.744694	292.368	269.045	0.38333	1.96325	0.532422	0.159158	0.342462	0.195253	-2.35658
	207	Ethyl-beta-glucuronide	0.726902	34.1637	221.066	0.664975	0.958852	0.365875	0.130892	0.330426	0.693512	-0.528008
	208	Enterolactone	0.872063	302.594	297.113	1.27437	1.27598	0.655558	0.996941	0.614606	0.998737	-0.00182319
	209	Eicosapentaenoic Acid	0.863321	437.328	301.217	0.867436	1.01229	0.2671	0.648919	0.512607	0.856902	-0.222797
	210	Dodecanedioic acid	0.729444	194.99	229.144	1.52713	1.8802	0.546428	0.731714	0.540137	0.812218	-0.300062
	211	DL-p-Hydroxyphenyllactic acid	0.739789	60.6994	181.05	1.38248	3.04531	0.183993	0.378311	0.410065	0.453969	-1.13934
	212	DL-Benzylsuccinic acid	0.976755	217.694	207.066	1.57557	2.61275	0.266354	0.558732	0.48056	0.603029	-0.729701
	213	DL-2-hydroxy stearic acid	0.976736	399.309	299.259	1.11156	1.28968	0.464321	0.712306	0.533787	0.861883	-0.214435
	214	Dihomo-alpha-linolenic acid (20:3(n-3))	0.760967	492.371	305.248	0.92087	0.927303	0.562817	0.98156	0.610916	0.993062	-0.0100438
	215	D-Glucuronic acid	0.991432	28.1231	193.034	0.51564	0.540911	0.58551	0.874884	0.583246	0.953281	-0.069026
	216	D-FRUCTOSE	0.950239	31.2935	179.055	0.604185	0.648559	0.659208	0.708737	0.532598	0.931581	-0.102246
	217	Deoxycholic Acid	0.996257	286.672	391.285	0.73836	0.901293	0.438759	0.581117	0.488809	0.819223	-0.287673
	218	D-(+)-Xylose	0.620159	30.8883	149.044	0.772683	0.834176	0.968239	0.776417	0.554065	0.926282	-0.110476
	219	Cyclohexanecarboxylate	0.970061	178.96	127.075	0.72964	1.83568	1.50199	0.0798181	0.29703	0.397477	-1.33106
	220	cis-9,10-Epoxystearic acid	0.931432	414.361	297.243	1.01129	1.50017	0.255546	0.270395	0.382837	0.67412	-0.568923
	221	cholesterol sulfate	0.994429	499.69	465.306	1.06342	1.07974	0.197697	0.854437	0.577487	0.984885	-0.0219725
	222	Ceftriaxone	0.991757	151.823	553.038	0.000394611	0.00192855	0.100294	0.39873	0.418279	0.204615	-2.28901
	223	Biliverdin	0.553923	272.81	581.24	0.260542	0.405539	0.669537	0.041099	0.246411	0.642458	-0.638325
	224	Bilirubin	0.938774	376.048	583.256	0.0681983	0.143232	0.0990325	0.201641	0.360437	0.476139	-1.07055
	225	beta-L-Fucose 1-phosphate	0.954607	248.927	243.029	0.259381	0.322512	0.298866	0.652914	0.513961	0.80425	-0.314284
	226	Atorvastatin	0.872824	312.96	557.245	0.00219618	0.549206	0.759576	0.147505	0.337757	0.00399883	-7.96621
	227	Asn Leu Arg Arg	0.831555	301.243	556.331	0.217329	0.943328	0.3958	0.24364	0.375057	0.230385	-2.11788
	228	Ascorbic acid	0.437347	28.4611	175.024	0.955755	1.52917	0.915237	0.106204	0.316258	0.625014	-0.678039
	229	Arachidonic Acid	0.99471	467.458	303.233	0.590886	1.08621	0.500997	0.0559255	0.270725	0.543991	-0.878346
	230	Androsterone sulfate	0.998608	254.925	369.174	0.904301	1.11837	0.0706256	0.735917	0.541487	0.808589	-0.306521
	231	AMC Arachidonoyl Amide	0.64653	410.629	460.283	1.27426	2.00566	1.19947	0.284757	0.386519	0.635331	-0.65442
	232	alpha-MANGOSTIN	0.942024	468.37	409.165	0.146985	2.67726	0.0694226	0.336682	0.397761	0.0549014	-4.18701
	233	Alisol A	0.532575	484.037	489.358	1.44944	1.89247	0.476115	0.714836	0.534626	0.765902	-0.384769
	234	Acylated phloroglucinol	0.914531	261.005	405.264	0.415841	0.597544	0.141515	0.515857	0.464765	0.695917	-0.523013
	235	9R,10S-EpOME	0.998237	390.608	295.227	1.13418	1.17143	0.387863	0.932463	0.598652	0.968203	-0.0466183
	236	9,10-DiHOME	0.92647	312.567	313.238	0.65314	0.927877	0.0240863	0.183496	0.353139	0.703907	-0.506543
	237	8-HYDROXYCARAPINIC ACID	0.565085	335.124	469.186	0.110088	2.27151	0.208608	0.256915	0.37908	0.0484648	-4.36692
	238	8-hydroxy-2'-deoxy Guanosine	0.804259	136.225	282.084	0.812237	1.23587	0.762348	0.270923	0.382978	0.65722	-0.605551
	239	8,11-eicosadiynoic acid	0.923373	488.545	303.233	1.08255	3.49575	1.13928	0.234378	0.372039	0.309677	-1.69116
	240	7,3'-Dihydroxyflavone	0.671656	263.783	253.05	0.487119	1.39566	0.331347	0.208177	0.362853	0.349024	-1.5186
	241	6-Gingerol	0.726513	347.459	293.176	0.0765566	0.648076	0.440098	0.295953	0.389185	0.118129	-3.08157
	242	5-HETrE	0.717761	374.694	321.243	0.700823	2.57181	2.05455	0.0776791	0.295119	0.272502	-1.87566
	243	5-HETE	0.848441	372.14	319.227	0.498258	1.4059	2.06528	0.00233826	0.0705817	0.354405	-1.49653
	244	5beta-CHOLANIC ACID-3alpha, 12alpha-DIOL N-(2-SULPHOETHYL)-AMIDE	0.991908	290.61	498.289	0.0401818	0.0804704	0.48058	0.140632	0.334896	0.499336	-1.00192
	245	5,7-dihydroxy-2-(3-hydroxy-4-methoxyphenyl)-2,3-dihydrochromen-4-one	0.987568	296.748	301.071	0.153469	0.492859	0.00133168	0.321983	0.394783	0.311385	-1.68323
	246	4-Methylcatechol	0.996012	233.355	123.044	1.16599	1.54819	0.993213	0.720262	0.536413	0.753129	-0.409031
	247	4-hydroxy-benzoate	0.996967	158.554	137.023	0.590704	0.815598	0.377837	0.228167	0.369906	0.724258	-0.465424
	248	4-Hydroxy-2',4',6'-trimethoxychalcone	0.905279	263.742	313.108	1.2282	1.5672	0.419667	0.405258	0.421025	0.783694	-0.351638
	249	3-Phenylpropionic acid	0.974617	184.602	149.06	1.23687	2.00071	1.74432	0.135746	0.332719	0.618213	-0.693824
	250	3-Isopropylmalic acid	0.965936	35.2201	175.06	0.703196	0.849916	0.151246	0.541934	0.474133	0.82737	-0.273395
	251	3-Indolepropionic acid	0.763056	196.917	188.071	1.26406	1.8765	0.770156	0.11665	0.32283	0.673627	-0.569977
	252	3-hydroxy-tetradecanoic acid	0.886016	308.894	243.196	0.800556	0.909621	0.0443433	0.690452	0.526406	0.880098	-0.184263
	253	3-hydroxy-3-methyl-Glutaric acid	0.606312	33.9494	161.044	0.801606	0.95592	0.101079	0.305213	0.391267	0.838571	-0.253996
	254	3b-Hydroxy-5-cholenoic acid	0.991521	401.714	373.274	1.40312	1.66148	0.0979427	0.566417	0.483428	0.844498	-0.243835
	255	3-amino-2-naphthoic acid	0.998338	195.615	186.055	0.635372	2.18042	0.270781	0.408879	0.422525	0.2914	-1.77893
	256	3,4-Dimethoxycinnamic acid	0.867921	204.667	207.066	0.536908	2.86756	0.968553	0.0449993	0.253865	0.187235	-2.41708
	257	2'-O-Methyl-5-methyluridine	0.476253	283.045	271.085	0.376084	2.69694	0.236737	0.324276	0.395241	0.139448	-2.8422
	258	2-Hydroxy-4-methylpentanoic acid	0.969205	93.4797	131.07	0.18508	0.318661	0.0700251	0.1983	0.359164	0.580807	-0.78387
	259	2-Hexyldecanoic acid	0.980105	477.931	255.232	0.363696	0.567271	0.457565	0.208318	0.362904	0.641133	-0.641304
	260	2-Ethyl-2-Hydroxybutyric acid	0.876759	44.8938	131.07	1.26069	1.27869	0.827316	0.974004	0.609078	0.985921	-0.0204556
	261	2,3-dinor Thromboxane B1	0.887264	207.724	343.212	1.41497	1.6899	0.380343	0.319917	0.394367	0.837308	-0.256169
	262	1-METHYLXANTHINE	0.949507	147.567	165.041	1.369	1.57291	0.788324	0.63741	0.508653	0.870366	-0.200306
	263	1-Hydroxy-2-(9Z,12Z-octadecadienoyl)-sn-glycero-3-phosphoethanolamine	0.925901	399.044	476.278	0.434835	0.746549	1.14389	0.179048	0.351179	0.582461	-0.779767
	264	1-Hydroxy-2-(9Z,12Z,15Z-octadecatrienoyl)-sn-glycero-3-phosphoethanolamine	0.831976	378.267	474.262	0.338375	0.432309	0.749383	0.39633	0.417256	0.782714	-0.353443
	265	17-HYDROXYPROGESTERONE	0.985572	201.505	365.197	1.18905	1.26366	0.281875	0.811567	0.564879	0.940955	-0.0878026
	266	16R-HETE	0.955755	414.533	319.225	0.935617	1.11891	0.206972	0.433502	0.432462	0.836184	-0.258108
	267	16,16-dimethyl-PGA1	0.603355	508.542	363.251	1.37343	1.99695	2.08673	0.00424941	0.0950051	0.687764	-0.540014
	268	14,15-EE-8(Z)-E	0.936688	382.779	323.259	1.05844	2.70693	2.15816	0.0545227	0.268833	0.391011	-1.35472
	269	13-HpOTrE(r)	0.988354	404.733	309.207	1.22945	3.51942	1.30116	0.17406	0.34889	0.349333	-1.51733
	270	13,14-dehydro-15-cyclohexyl Carbaprostacyclin	0.505974	442.399	345.204	0.67509	0.756977	0.193877	0.70419	0.531074	0.891824	-0.16517
	271	12-Hydroxydodecanoic acid	0.821282	250.32	215.165	1.37276	2.11507	1.33299	0.270341	0.382822	0.649038	-0.623625
	272	12,13-DiHOME	0.818994	293.63	313.238	0.708227	1.2102	0.886253	0.0352589	0.233641	0.585213	-0.772966
	273	11-deoxy-11-methylene-PGD2	0.915267	437.72	349.238	0.0864433	1.10578	1.32803	0.251326	0.377428	0.078174	-3.67717
	274	1,7-Dimethyluric acid	0.805515	138.361	195.052	1.10055	1.30766	0.0228728	0.679572	0.522758	0.841621	-0.248757
	275	[10]-Dehydrogingerdione	0.993939	502.103	345.207	0.785466	1.64777	0.495171	0.541202	0.473847	0.476685	-1.06889
	276	[(2S,3S,4R,5R)-4-hydroxy-2,5-bis(hydroxymethyl)-2-[(2R,3R,4S,5S,6R)-3,4,5-trihydroxy-6-(hydroxymethyl)oxan-2-yl]oxyoxolan-3-yl] (E)-3-(4-hydroxy-3-methoxyphenyl)prop-2-enoate	0.536082	197.153	517.156	1.1962	2.68519	0.0804224	0.53705	0.472222	0.445479	-1.16657
	277	(7E)-2-acetyl-2,3,4,5-tetrahydrooxonine-6,9-dione	0.854712	151.391	195.065	0.183748	0.65282	0.0358941	0.136345	0.332993	0.281468	-1.82896
	278	(2-oxo-2,3-dihydro-1H-indol-3-yl)acetic acid	0.496296	128.553	190.053	0.328425	0.443451	0.0700044	0.248997	0.376722	0.740613	-0.433207
	279	(+)-Isostearic acid	0.980738	497.23	283.264	2.4448	2.75373	1.20378	0.654752	0.51458	0.887812	-0.171674
