# Supplementary material for: Analysis of gut microbiota and metabolites in patients with rheumatoid arthritis and identification of potential biomarkers
Source: Aging (Albany NY). 2021 Oct 20;13(20):23689–701. doi: 10.18632/aging.203641 (PMC8580343; doi:10.18632/aging.203641)
Supplement: Supplementary Table 1G [file aging-13-203641-s008.xls]

## Sheet: G-metabolites in the POS
Supplementary Table 1G. The metabolites in the POS that we detected.
	id	MS2 name	MS2 score	rt	mz	MEAN RA	MEAN HC	VIP	P-VALUE	Q-VALUE	FOLD CHANGE	LOG_FOLDCHANGE
up	1	1-Pyrroline	0.999451	34.3993	70.0658	0.945348	0.547718	1.64803	0.419667	0.288048	1.72598	0.787414
	2	N-(3-Aminopropyl)morpholine	0.998804	56.5122	145.134	1.27067	0.588323	0.0268471	0.155132	0.280607	2.15982	1.11091
	3	1H-Indole-4-acetic acid, 2,3-dihydro-2-oxo-	0.998787	172.167	192.069	1.91354	1.756	0.384934	0.707231	0.372109	1.08971	0.12395
	4	Piperidine	0.998346	25.7601	86.0969	0.990022	0.84754	0.912207	0.719095	0.375661	1.16811	0.224179
	5	1,2,3,4,5,6-Hexahydro-5-(1-hydroxyethylidene)-7H-cyclopenta[b]pyridin-7-one	0.997992	354.639	180.102	2.35123	1.69232	0.39655	0.266293	0.280769	1.38935	0.474413
	6	Valsartan	0.997843	350.063	436.234	1.02086	0.344891	0.765357	0.384168	0.28145	2.95996	1.56558
	7	Pro Val Asn	0.995445	288.653	329.183	1.70303	1.64554	0.784947	0.937234	0.43833	1.03493	0.0495394
	8	3-Methyl-quinolin-2-ol	0.995445	173.232	160.076	10.4247	1.15964	0.832036	0.0563371	0.279927	8.98958	3.16825
	9	Famotidine	0.995218	158.938	338.052	3.01597	0.0189393	0.95232	0.325178	0.28081	159.244	7.31509
	10	Sulindac sulfide	0.993832	305.214	341.099	0.0299088	0.0226197	0.077191	0.693248	0.367857	1.32225	0.402991
	11	Glu Thr Ala	0.993407	35.024	320.145	1.68864	1.17214	0.0753496	0.114263	0.280468	1.44065	0.526722
	12	Methionine	0.993294	44.5247	150.058	0.986375	0.391302	2.97264	3.87403e-06	0.0149983	2.52075	1.33385
	13	LEUCINE	0.993024	88.7027	132.102	0.576125	0.551302	2.06381	0.914047	0.432173	1.04503	0.06354
	14	TRIGONELLINE	0.992621	34.7967	138.055	1.70358	1.29781	0.077403	0.755669	0.386397	1.31266	0.392492
	15	Pantothenic acid	0.991758	157.445	220.118	1.57565	0.818232	0.571991	0.057947	0.279957	1.92567	0.945364
	16	2R-aminoheptanoic acid	0.99153	56.253	146.118	1.77867	0.5207	0.771744	0.0264831	0.278732	3.41591	1.77227
	17	d-Dethiobiotin	0.991251	110.809	215.139	1.57614	1.3269	1.43837	0.732884	0.379726	1.18784	0.248339
	18	His Ser Arg Arg	0.990772	320.547	555.309	1.00783	0.0716826	1.171	0.195478	0.280687	14.0596	3.81349
	19	2-(4-Methoxyphenethyl)chromone	0.990514	240.453	281.117	2.31047	1.70555	0.0590459	0.374732	0.28091	1.35467	0.437943
	20	Olmesartan	0.990335	247.28	447.213	0.0257576	0.0215568	0.342292	0.795013	0.398309	1.19487	0.25686
	21	4-Trimethylammoniobutanoic acid	0.985531	35.0234	146.117	0.840798	0.713522	1.34331	0.692764	0.367708	1.17838	0.236801
	22	Rosuvastatin	0.984656	323.816	482.175	4.4761	0.00333059	0.384094	0.169872	0.280641	1343.94	10.3922
	23	Evoxanthidine	0.98444	280.666	270.076	3.0629	0.367765	0.351337	0.167555	0.280636	8.32842	3.05804
	24	Oseltamivir	0.984045	217.798	313.22	0.894964	0.498008	1.3982	0.0150752	0.277044	1.79709	0.845659
	25	trans-S-(1-Propenyl)-L-cysteine	0.983705	57.5696	162.058	0.925338	0.744151	1.00011	0.792807	0.397643	1.24348	0.314385
	26	2,6-Methano-2H-quinolizine	0.983596	224.368	327.17	0.133166	0.0821236	1.05164	0.54181	0.321917	1.62153	0.697353
	27	norbutorphanol	0.983176	334.947	260.163	0.0781608	0.0170757	1.30411	0.244424	0.280749	4.57732	2.1945
	28	Diltiazem	0.982338	273.7	415.168	0.0091487	0.00681059	0.858498	0.40011	0.283499	1.3433	0.425786
	29	Codamine	0.982305	198.189	344.185	2.1974	1.07025	1.26969	0.420298	0.288193	2.05317	1.03785
	30	Buprenorphine	0.981588	275.889	468.303	6.08579	4.24751	0.330303	0.713855	0.374098	1.43279	0.518827
	31	L-alpha-Amino-gamma-oxalylaminobutyric acid	0.98147	31.7537	191.066	0.122089	0.0916668	0.35139	0.697113	0.369039	1.33188	0.413467
	32	Val Thr Ile	0.979052	206.474	332.217	1.17916	0.647104	3.00313	0.00815004	0.273771	1.82222	0.865695
	33	Oxprenolol glucuronide	0.977899	325.697	442.209	1.00902	0.626415	0.537231	0.16988	0.280641	1.61079	0.687766
	34	Dibenzo[b,e]thiepin, 1-propanamine deriv	0.97688	222.069	298.128	2.55048	1.13993	0.577847	0.413847	0.286696	2.23741	1.16183
	35	Metoprolol	0.976735	218.993	268.19	0.564686	0.448976	0.442109	0.87112	0.420409	1.25772	0.33081
	36	Octopine	0.97477	35.4355	247.14	1.1502	0.702623	1.93071	0.213401	0.280713	1.63701	0.71106
	37	3-(2,4-Cyclopentadien-1-ylidene)-5alpha-androstan-17beta-ol	0.974064	308.561	339.268	2.57489	0.339476	1.36365	0.00128105	0.240601	7.58488	2.92313
	38	N-Acetylcadaverine	0.972443	43.9822	145.133	1.27959	0.697756	0.0441503	0.21449	0.280715	1.83387	0.874889
	39	Ile Thr Gln Lys	0.969931	285.332	489.298	0.607192	0.0561819	0.543956	0.324264	0.28081	10.8076	3.43398
	40	Met Pro Thr His	0.969014	147.331	485.22	3.30735	0.474185	0.557293	0.246859	0.280751	6.97482	2.80216
	41	Gly Ile Leu	0.967261	190.735	302.207	1.30621	1.14227	2.42403	0.774363	0.392019	1.14351	0.193474
	42	(1R*,3R*,3'S*)-1,2,3,4-Tetrahydro-1-(2-thio-3-pyrrolidinyl)-beta-carboline-3-carboxylic acid	0.966853	218.734	316.111	0.675375	0.0367523	0.482457	0.0184084	0.277751	18.3764	4.19978
	43	Ile Gly Gly Ile	0.966553	205.341	359.228	1.09757	0.530857	3.04277	0.00256483	0.259256	2.06755	1.04792
	44	Americanol A	0.964875	216.632	331.11	0.651154	0.60989	0.362269	0.902039	0.428931	1.06766	0.0944509
	45	Pterolactam	0.963638	34.9385	116.071	0.87931	0.410436	1.5167	0.301484	0.280796	2.14238	1.09921
	46	Val Asn Ile	0.963145	188.158	345.213	1.16796	0.547617	3.29311	0.000201004	0.139661	2.13281	1.09276
	47	Tilidine	0.963022	358.716	274.18	0.103078	0.0541715	0.357826	0.342245	0.28082	1.90281	0.928135
	48	(23R)-23,25-dihydroxyvitamin D3	0.961219	351.867	417.335	1.06766	0.959433	0.0225954	0.680528	0.363926	1.1128	0.154195
	49	gamma-Glutamylmethionine	0.961114	146.648	279.1	0.77422	0.482596	0.69192	0.513272	0.313362	1.60428	0.681928
	50	Methocarbamol	0.960758	157.437	242.1	1.83616	0.984894	0.690986	0.0614824	0.280017	1.86432	0.898653
	51	Phenisopham	0.960671	258.99	343.165	1.05044	0.823308	0.918208	0.410913	0.286005	1.27588	0.35149
	52	His Pro Ala Gln	0.960653	289.395	452.228	0.781123	0.0912569	0.876227	0.190148	0.280679	8.55961	3.09754
	53	Bufadienolide	0.960244	320.856	355.262	7.41314	3.11367	1.92477	0.029059	0.278932	2.38084	1.25147
	54	Gravacridonechlorine	0.95864	214.023	360.101	0.159839	0.00527625	1.46895	0.0286631	0.278903	30.2941	4.92096
	55	Arg Gln Met	0.954527	289.531	434.218	0.719037	0.127555	0.0211983	0.202704	0.280698	5.63708	2.49495
	56	Ala His Ala His	0.952203	243.482	435.212	0.254874	0.128135	0.727989	0.0824614	0.280265	1.98911	0.99212
	57	Sulfamethoxazole	0.951543	208.108	254.048	1.66242	1.35017	0.302962	0.584528	0.334545	1.23126	0.300141
	58	Flazine	0.95094	278.832	309.086	1.28758	0.979231	0.7742	0.261242	0.280765	1.31489	0.394946
	59	N-Cyclohexylformamide	0.950934	56.5099	128.107	1.06393	0.809603	0.417653	0.549327	0.324153	1.31414	0.394117
	60	3,5-dimethyl PIT-1	0.950782	181.847	346.085	0.229245	0.0522658	1.4272	0.012344	0.276184	4.38614	2.13295
	61	Oseltamivir carboxylate	0.949929	249.107	285.184	3.43272	1.07056	0.427309	0.322782	0.280809	3.20645	1.68098
	62	Cnidilin	0.949388	266.68	301.107	0.152573	0.0983183	0.557053	0.458727	0.297955	1.55182	0.633965
	63	3beta-20(29)-Lupene-3,27-diol	0.949362	517.928	443.387	1.67809	0.146834	0.232268	0.0182884	0.27773	11.4285	3.51456
	64	(2S,2'S)-Pyrosaccharopine	0.949312	62.703	259.129	0.320727	0.230426	0.134467	0.372327	0.280877	1.39189	0.477041
	65	Didesmethylchlorpheniramine	0.947774	176.169	247.099	1.11181	0.933205	1.56114	0.845144	0.413051	1.19139	0.25264
	66	Mesobilirubinogen	0.946375	355.554	593.332	3.88257	1.17132	1.60518	0.0488089	0.279763	3.31469	1.72887
	67	25-hydroxy-16,17,23,23,24,24-hexadehydrovitamin D3	0.945306	295.417	395.29	1.54757	1.45383	0.344199	0.8473	0.413669	1.06448	0.0901449
	68	16-phenyl-tetranor-PGE2	0.944755	205.714	355.186	1.24455	1.21135	0.254045	0.911645	0.431527	1.02741	0.039008
	69	Cys Met Phe	0.944333	289.82	400.133	0.169609	0.0361554	0.34283	0.0462166	0.279694	4.6911	2.22993
	70	Met Pro Arg Lys	0.943951	320.584	531.309	0.675941	0.060278	0.941466	0.285694	0.280785	11.2137	3.48719
	71	Hydroxychloroquine	0.943812	177.495	336.183	0.754799	0.0319896	1.68295	0.0308572	0.279051	23.5952	4.56042
	72	Dolichotheline	0.942535	163.066	196.144	3.24245	1.73201	0.0025715	0.479776	0.303387	1.87207	0.904635
	73	THTC	0.942478	44.5148	133.032	1.01151	0.537088	2.75191	0.00987512	0.275007	1.88332	0.91328
	74	(22E)-1alpha,3beta-Dihydroxychola-5,16,22-trien-24-oic Acid	0.941801	280.754	387.252	1.13806	1.11972	0.266021	0.955161	0.443	1.01638	0.0234359
	75	Dihydrosphingosine	0.940509	378.274	302.305	2.83147	1.48632	1.42293	0.100944	0.280399	1.90502	0.92981
	76	1-oxoprevitamin D3	0.939779	352.155	399.325	1.13815	0.884956	0.44038	0.273731	0.280775	1.28611	0.363011
	77	Phe Arg Cys Lys	0.938643	306.688	553.293	1.44612	0.124037	0.84371	0.183285	0.280667	11.6587	3.54334
	78	Gln Gly Phe	0.938099	181.285	351.166	0.442737	0.0294867	1.97682	0.0562558	0.279926	15.0148	3.90831
	79	Stearamide	0.937403	378.037	284.294	2.81415	1.47346	1.34242	0.0992892	0.280389	1.90989	0.933492
	80	Hapalindole D	0.934509	30.3368	337.171	0.86179	0.482542	1.31615	0.156571	0.280611	1.78594	0.836683
	81	Alachlor	0.93343	205.836	270.123	0.518188	0.144401	1.42355	0.0603173	0.279998	3.58853	1.84339
	82	Pteroic acid	0.93309	155.459	313.102	2.05985	1.27386	0.614507	0.284307	0.280784	1.61701	0.693329
	83	BRUCINE	0.931216	228.581	395.196	0.678638	0.459817	0.439054	0.597837	0.338572	1.47589	0.561583
	84	Gly Tyr Arg Arg	0.930675	409.038	551.303	1.98541	0.209396	1.70861	0.123609	0.280508	9.4816	3.24513
	85	Ala Gln Thr	0.930588	30.7793	319.161	1.11781	0.871442	0.866315	0.370893	0.280857	1.28272	0.359205
	86	Valenciachrome	0.930557	346.279	413.304	1.25156	1.05291	0.00483932	0.378156	0.280994	1.18867	0.249343
	87	medermycin	0.929938	325.59	458.184	1.01532	0.545965	0.995513	0.0889746	0.280318	1.85968	0.895058
	88	Chalciporone	0.928507	331.88	244.169	0.257429	0.0068727	0.437171	0.33259	0.280814	37.4568	5.22716
	89	Tyr Asn Ile	0.923875	188.431	409.207	1.49563	1.29574	2.23435	0.781315	0.394151	1.15426	0.206971
	90	METOLACHLOR	0.919527	196.113	284.139	0.595994	0.181909	0.825221	0.24571	0.28075	3.27632	1.71208
	91	Threoninyl-Proline	0.919392	44.4909	217.118	1.40253	1.35421	1.41386	0.930407	0.436531	1.03568	0.050574
	92	3-Glucosyl-2,3',4,4',6-pentahydroxybenzophenone	0.919259	195.482	425.105	0.0289542	0.00814078	0.799537	0.370853	0.280856	3.55668	1.83053
	93	Cys Val Pro Val	0.918818	226.339	417.216	2.2579	1.16183	0.283878	0.388819	0.281827	1.94341	0.95859
	94	gamma-L-Glutamyl-L-pipecolic acid	0.918087	45.7565	259.129	5.74538	2.57943	0.461583	0.205167	0.280702	2.22739	1.15535
	95	D-2-Aminobutyric acid	0.916446	33.358	104.071	1.22364	1.07063	0.362942	0.767246	0.389872	1.14292	0.192723
	96	Droxidopa	0.915974	204.277	214.061	1.97649	1.78068	0.239418	0.635336	0.350095	1.10996	0.150512
	97	Cephalexin	0.915947	225.679	348.101	0.616677	0.035961	2.23142	0.0385661	0.279438	17.1485	4.10001
	98	3-oxoglycyrrhetinic acid	0.915355	336.703	469.33	2.28267	1.37196	0.962346	0.0479411	0.279741	1.6638	0.734478
	99	5-Pentyloxazole	0.915123	237.488	140.107	2.58187	1.2369	0.268308	0.472604	0.30151	2.08737	1.06169
	100	12alpha-Hydroxyamoorstatin	0.913537	224.338	533.231	0.0326899	0.0035112	1.58408	0.0296496	0.278972	9.31019	3.21881
	101	L-gamma-glutamyl-L-valine	0.911842	206.77	247.133	1.21878	0.591289	0.565431	0.322364	0.280809	2.06123	1.0435
	102	Alanine Dimer	0.910963	34.2981	161.092	2.81568	2.65202	0.112372	0.924106	0.434861	1.06171	0.0863887
	103	Spisulosine	0.908717	395.267	286.31	1.64071	1.53197	0.53229	0.801326	0.400206	1.07098	0.0989349
	104	Val Val Pro	0.907752	174.02	314.207	1.50127	1.43354	0.892479	0.888078	0.425114	1.04725	0.0666068
	105	3-oxo-heneicosanoic acid	0.907556	540.99	341.304	1.06073	0.878052	0.44018	0.603708	0.340399	1.20805	0.272676
	106	santin	0.904403	200.97	345.096	3.20852	0.565895	0.647728	0.178249	0.280657	5.66982	2.5033
	107	PC(O-14:1(1E)/0:0)	0.90236	271.591	452.311	1.95166	1.09892	1.75247	0.0842003	0.28028	1.77598	0.828617
	108	1alpha,25-dihydroxy-24-norvitamin D3	0.899714	295.192	403.32	0.581717	0.554402	0.401886	0.864464	0.418541	1.04927	0.0693845
	109	Thr Phe	0.898213	173.206	267.134	1.26638	0.81516	2.33101	0.0393883	0.27947	1.55354	0.635555
	110	D-erythro-Sphingosine C-20	0.897478	402.006	328.32	3.07272	1.59349	0.716048	0.110048	0.280448	1.92829	0.947322
	111	Lys Lys Ile Glu	0.896303	309.849	517.33	0.771985	0.0963434	1.36305	0.275879	0.280777	8.01285	3.00232
	112	Guanine	0.895971	137.711	152.057	1.56824	1.47028	0.544563	0.885625	0.424438	1.06663	0.093054
	113	Asn Gly Val	0.895118	31.247	289.15	1.55058	1.33502	0.691682	0.693366	0.367893	1.16146	0.215945
	114	PC(O-12:0/O-2:0)	0.89252	282.685	454.327	1.87855	0.782684	1.43752	0.0826675	0.280267	2.40014	1.26312
	115	Coproporphyrin I	0.89157	328.07	655.274	1.11245	1.01755	0.958889	0.81675	0.404791	1.09326	0.128636
	116	5beta-Chola-8(14),11-dien-24-oic Acid	0.889992	306.804	357.278	0.834749	0.305492	1.93046	0.0220889	0.278286	2.73247	1.45021
	117	Piperine	0.889597	362.988	286.143	0.909617	0.488823	0.597461	0.427171	0.289754	1.86083	0.895947
	118	Berberine	0.889205	266.49	336.122	4.95393	0.00639361	1.17196	0.151217	0.280597	774.824	9.59773
	119	Celecoxib	0.887961	391.95	382.082	2.31942	0.00189385	1.96925	0.167784	0.280636	1224.71	10.2582
	120	Trimethoprim	0.887777	191.154	291.145	0.0738358	0.0657971	0.355227	0.764325	0.388999	1.12217	0.166297
	121	PA(22:2(13Z,16Z)/0:0)	0.882456	296.512	491.314	1.43385	0.176702	0.538901	0.32142	0.280808	8.11446	3.0205
	122	(3b,24x)-Cycloartane-3-oxo-24,25-diol	0.882175	387.671	459.382	1.81621	0.052258	1.03147	0.0695009	0.280129	34.7546	5.11913
	123	Pentadecanoyl-EA	0.881493	348.99	286.273	2.40285	2.33032	0.0200714	0.960647	0.444414	1.03112	0.0442192
	124	2,22-Dideoxy-3-dehydroecdysone	0.879736	363.752	431.315	1.59225	1.18546	0.42083	0.184768	0.280669	1.34315	0.425621
	125	3',4'-Dihydrodiol	0.878899	197.25	287.1	0.747395	0.333293	1.30943	0.376542	0.280934	2.24246	1.16508
	126	Valyl-Valine	0.87353	142.185	217.155	1.43198	1.30419	2.50094	0.871526	0.420523	1.09798	0.134857
	127	Urolithin D	0.870306	262.166	261.039	1.09667	0.192214	0.0753283	0.259916	0.280764	5.70546	2.51234
	128	Desethylchloroquine	0.870227	176.982	292.157	1.09588	0.388448	1.25033	0.169375	0.28064	2.82117	1.4963
	129	3,12-Dioxo-5beta-chol-6-en-24-oic Acid	0.868358	349.806	387.252	3.77565	1.7226	1.22887	0.384601	0.281483	2.19183	1.13214
	130	Asp Glu Asp	0.866833	247.723	378.111	0.808666	0.0879707	1.13908	0.210679	0.28071	9.19245	3.20045
	131	Gly Asp Glu	0.863464	36.2408	320.108	3.61715	2.62397	0.905691	0.237923	0.280742	1.3785	0.463099
	132	Deacetyl-N-monodemethyldiltiazem	0.860757	256.543	359.141	3.44588	0.081462	0.357813	0.125501	0.280515	42.3005	5.4026
	133	celecoxib carboxylic	0.858953	332.216	412.057	2.46832	0.00861197	2.24024	0.0251413	0.278613	286.615	8.16297
	134	Leu Val	0.858716	168.894	231.17	1.39854	1.02497	2.52614	0.45732	0.297587	1.36446	0.448329
	135	Nicergoline	0.857013	286.193	484.131	7.40382	0.00196555	1.72275	0.135126	0.28055	3766.79	11.8791
	136	Melitric acid B	0.852783	248.158	521.107	0.606145	0.0264536	0.428633	0.110908	0.280452	22.9135	4.51813
	137	2-Aminoestra-1,3,5(10)-triene-3,17beta-diol	0.851544	381.509	288.195	0.089575	0.0285786	0.689674	0.49084	0.306626	3.13433	1.64816
	138	9-O-Methylneodunol	0.851018	286.285	295.092	1.62584	1.32692	0.292095	0.777092	0.392858	1.22527	0.293102
	139	L-cis-Cyclo(aspartylphenylalanyl)	0.849253	193.341	263.102	2.12686	1.54028	0.738673	0.322046	0.280809	1.38082	0.46553
	140	2-Pyrrolidinone, 1-ethyl-4-[2-[(2-hydroxyethyl)amino]ethyl]-3,3-diphenyl- (7CI,8CI,9CI)	0.849118	201.353	353.219	0.238526	0.144965	0.191707	0.400119	0.2835	1.6454	0.718442
	141	Atazanavir	0.848625	454.598	705.401	0.691299	0.629763	0.761954	0.869621	0.419989	1.09771	0.134501
	142	Hexaconazole	0.847287	58.3789	314.084	1.23217	0.521069	1.88135	0.0417791	0.279557	2.3647	1.24166
	143	Pro Ala Trp Ala	0.841101	329.22	444.225	0.827864	0.709638	1.00774	0.735103	0.380374	1.1666	0.22231
	144	5beta-Chola-3,8(14),11-trien-24-oic Acid	0.837887	298.048	355.262	0.571272	0.531274	1.29064	0.879034	0.422614	1.07529	0.104721
	145	Val Ser Val	0.835112	166.645	304.186	1.58642	0.698101	3.13469	0.0112927	0.275744	2.27247	1.18426
	146	PC(O-6:0/0:0)[U]	0.834614	189.351	342.202	1.49256	1.23881	1.86558	0.625188	0.347012	1.20483	0.268829
	147	16-phenyl tetranor PGF2alpha	0.834067	186.132	357.212	2.13211	1.27361	1.92344	0.148108	0.280589	1.67407	0.743357
	148	ISOCORYDINE (+)	0.832216	200.822	342.169	2.73493	0.345811	0.700815	0.16212	0.280624	7.90873	2.98345
	149	Glu Glu Ile	0.831273	173.177	390.186	1.05359	0.953614	3.03556	0.880728	0.423084	1.10483	0.143829
	150	Gly Met Phe Gly	0.830459	238.878	411.171	4.43962	0.0669842	0.465015	0.327103	0.280811	66.2786	6.05047
	151	Helilupolone	0.82931	241.887	463.283	2.91956	0.62546	1.99195	0.185814	0.280671	4.66786	2.22276
	152	Ergoline-1,8-dimethanol, 10-methoxy-, (8b)-	0.827733	256.624	303.17	0.432792	0.209403	0.963595	0.169783	0.280641	2.06679	1.04739
	153	Nigellidine	0.823384	325.688	295.144	1.75357	0.794891	0.863937	0.0820087	0.280261	2.20605	1.14147
	154	Isodomoic acid A	0.822609	267.536	312.134	0.987179	0.881518	0.591989	0.660712	0.357783	1.11986	0.163322
	155	Isoxaben	0.819297	288.567	333.18	0.971492	0.503934	0.138237	0.316844	0.280805	1.92781	0.946966
	156	Asp Val Trp Gly	0.818758	223.323	476.209	0.04592	0.00393439	2.58943	0.0252143	0.278619	11.6714	3.54491
	157	8-Hydroxy-7-methylguanine	0.816786	138.287	182.067	1.13255	0.767248	1.48077	0.234652	0.280739	1.47612	0.561807
	158	Met Ala Tyr Pro	0.81349	31.3646	481.213	1.0397	0.765389	0.351919	0.48047	0.30358	1.3584	0.441904
	159	Gentamicin C1a	0.810209	263.22	450.295	1.7377	0.978834	1.70949	0.021416	0.278202	1.77528	0.828043
	160	(R)-3,4-Dihydro-2-methyl-2-(4,8,12-trimethyl-3,7,11-tridecatrienyl)-2H-1-benzopyran-6-ol	0.810065	312.023	383.294	1.44698	0.869423	1.46237	0.01495	0.277011	1.6643	0.734918
	161	PE(19:1(9Z)/0:0)	0.808923	450.562	494.323	2.81197	0.501821	0.421961	0.116496	0.280478	5.60353	2.48634
	162	3-Deoxy-25-hydroxyvitamin D3	0.808782	472.257	385.346	1.17377	1.07435	0.2918	0.777892	0.393103	1.09254	0.12769
	163	Benazepril	0.808069	254.671	425.214	0.0675919	0.0573785	0.336743	0.727862	0.378253	1.178	0.23634
	164	24,25-epoxy-cholesterol	0.806416	359.741	401.34	2.63663	0.506256	0.522851	0.315699	0.280805	5.2081	2.38076
	165	15-HETE-DA	0.801002	399.201	456.307	1.82992	1.42416	0.717547	0.525465	0.316946	1.28491	0.361671
	166	Val Asp Ser	0.79756	57.5191	320.145	1.10297	0.417468	2.16573	0.0232082	0.278416	2.64205	1.40166
	167	Thymine	0.795272	119.406	127.05	1.81227	1.14067	0.799129	0.322599	0.280809	1.58878	0.667923
	168	All-Trans-3,4-Didehydro-Retinoic acid	0.792385	230.115	299.2	3.61784	2.20565	1.41687	0.323613	0.280809	1.64026	0.713922
	169	1alpha,25-dihydroxy-23-oxavitamin D3	0.792009	302.672	419.315	1.64756	1.16251	0.870054	0.193164	0.280684	1.41725	0.503092
	170	3,6-Dimethoxyestra-1,3,5(10),6,8-pentaene-17beta-carboxylic acid methyl ester	0.791677	284.463	355.19	0.0210795	0.0123363	0.155572	0.315815	0.280805	1.70874	0.772933
	171	Glu Leu Lys Asn	0.790873	215.181	503.277	0.988995	0.405257	2.17612	0.0258234	0.278675	2.44042	1.28713
	172	4,4'-Methylenebis(2,6-di-tert-butylphenol)	0.787055	384.806	425.341	2.8282	2.39506	0.0624711	0.713159	0.37389	1.18085	0.239824
	173	(22E)-3beta-Hydroxy-5alpha-chola-16,22-dien-24-oic Acid	0.786143	465.292	373.273	2.54605	2.37514	0.105587	0.92088	0.434001	1.07196	0.100252
	174	DEOXYSAPPANONE B 7,3'-DIMETHYL ETHER ACETATE	0.783795	381.513	357.13	0.0043846	0.000484936	0.576635	0.224862	0.280728	9.04161	3.17658
	175	Pro Glu Asn	0.781926	233.881	359.157	0.567028	0.333758	0.124456	0.0894403	0.280322	1.69892	0.76462
	176	Isoacitretin	0.781789	249.946	327.195	0.697527	0.307759	0.761322	0.254067	0.280758	2.26647	1.18045
	177	MG(18:2(9Z,12Z)/0:0/0:0)	0.781693	431.284	355.284	1.89618	1.68529	0.419945	0.840802	0.411803	1.12513	0.170094
	178	Gravacridonolchlorine	0.781046	183.176	376.096	0.22115	0.0426032	0.563075	0.0719783	0.280159	5.19092	2.37599
	179	Dothiepin	0.780827	325.712	296.147	1.81366	0.809401	0.865732	0.0885867	0.280316	2.24075	1.16398
	180	Lys Trp Arg Ala	0.779289	250.441	560.335	3.72787	0.0712078	2.37676	0.208904	0.280707	52.352	5.71017
	181	5-Oxo-2(5H)-isoxazolepropanenitrile	0.778297	44.2551	139.05	1.14691	0.634037	1.19845	0.0218359	0.278255	1.8089	0.855114
	182	Gln Pro Gln	0.774607	285.28	372.188	0.049952	0.0273876	1.44734	0.370035	0.280844	1.82389	0.867019
	183	(R)-Roscovitine	0.771099	210.637	355.222	5.4565	2.21739	0.699823	0.45898	0.298021	2.46077	1.29911
	184	1-alkenyl-2-acyl-glycerophosphoethanolamine	0.767947	58.1146	242.042	1.14053	0.639408	1.53186	0.0968666	0.280374	1.78373	0.834898
	185	Columbamine	0.765418	246.278	338.138	4.91343	0.180981	0.870595	0.132386	0.28054	27.1489	4.76282
	186	Mephobarbital	0.762866	187.946	247.107	1.64614	1.241	0.237173	0.185303	0.28067	1.32646	0.407585
	187	y-Morphine	0.760817	203.398	569.263	1.99184	1.34069	0.339831	0.678263	0.363219	1.48569	0.571128
	188	3-Hydroxyomeprazole	0.759748	207.923	362.116	0.438255	0.0587664	0.344809	0.136583	0.280554	7.45758	2.89871
	189	Levofloxacin	0.758667	199.41	362.15	0.863377	0.010896	1.39181	0.328033	0.280812	79.238	6.30812
	190	18alpha-GLYCYRRHETINIC ACID	0.757194	454.865	471.346	1.91463	0.240169	1.25562	0.026537	0.278737	7.97199	2.99494
	191	hexamethylene bisacetamide	0.756275	180.44	201.16	2.12254	0.865969	0.0351752	0.134818	0.280549	2.45106	1.29341
	192	Asn Arg Arg Ala	0.754682	203.003	516.301	3.82826	1.16524	1.78344	0.321374	0.280808	3.28539	1.71607
	193	Asp Asp Asp	0.753029	203.23	364.096	0.783917	0.0544027	0.705701	0.0846719	0.280284	14.4095	3.84895
	194	(4alpha,5alpha)-4,14-Dimethyl-9,19-cyclocholest-20-en-3-one	0.752851	522.95	411.361	1.79771	1.45307	0.11929	0.557532	0.32656	1.23718	0.307054
	195	Val Pro Val	0.752563	255.988	314.207	2.41206	0.836104	0.788609	0.20857	0.280707	2.88489	1.52851
	196	Lupenone	0.752354	518.033	425.377	1.65905	0.0585986	0.990477	0.0229015	0.278382	28.3121	4.82335
	197	Imiprothrin	0.752211	257.889	319.165	0.65117	0.592553	0.174548	0.787598	0.396066	1.09892	0.13609
	198	Laurelliptine	0.751409	203.194	314.149	1.69507	0.678006	2.10197	0.0395772	0.279477	2.50008	1.32197
	199	6-Hydroxymethyletoricoxib	0.748617	257.091	375.053	5.52441	0.277483	0.879581	0.0533342	0.279867	19.909	4.31535
	200	Cadabicilone	0.741073	214.29	251.164	2.5675	1.54141	0.56503	0.325633	0.280811	1.66568	0.736109
	201	Linagliptin	0.740675	241.316	473.239	0.050685	0.0393709	0.433494	0.552134	0.32498	1.28737	0.364431
	202	Exiguaflavanone H	0.740413	206.511	507.236	0.900477	0.276626	1.02988	0.215681	0.280716	3.25522	1.70275
	203	Neolitsine	0.737121	228.937	324.122	5.0344	0.492891	0.813825	0.0397446	0.279484	10.214	3.35248
	204	Androsterone Enanthate	0.736439	334.819	403.32	1.27418	0.868411	1.44473	0.0948439	0.28036	1.46726	0.553123
	205	Gly Lys Phe Gly	0.734695	350.471	408.22	1.10089	0.37628	1.34481	0.391024	0.282134	2.92572	1.54879
	206	(+)-Prosopinine	0.727488	310.64	314.268	0.0203109	0.0124988	0.475383	0.242117	0.280747	1.62503	0.700462
	207	(10S)-1alpha,19,25-trihydroxy-10,19-dihydrovitamin D3	0.725614	371.485	435.346	2.06399	1.86591	0.0833892	0.694952	0.368379	1.10615	0.145552
	208	4-Pyridinol, 2-[[[5-(difluoromethoxy)-1H-benzimidazol-2-yl]sulfinyl]methyl]-3-methoxy-	0.72471	181.808	370.063	0.0180619	0.0153174	0.938096	0.561813	0.327801	1.17918	0.237783
	209	29-Norcycloartane-3,24-dione	0.720741	524.558	427.356	1.4217	1.30466	0.194908	0.756233	0.386568	1.08971	0.123939
	210	Asn Asp Val Phe	0.719356	263.689	494.225	1.4874	1.03208	0.293161	0.371097	0.280859	1.44118	0.527246
	211	(17E)-1alpha,25-dihydroxy-17,20-didehydro-21-norvitamin D3	0.718645	311.493	401.304	1.28435	0.888464	1.2092	0.0898788	0.280325	1.44558	0.531653
	212	alpha,alpha'-diethyl-3,4,4'-stilbenetriol	0.718048	198.757	285.142	17.8496	9.66894	0.00181675	0.533116	0.319291	1.84608	0.884463
	213	Lys Asp Arg Ser	0.716763	370.531	505.272	0.493786	0.386176	0.998256	0.5205	0.315468	1.27866	0.354628
	214	2-oxo-pentadecanoic acid	0.716317	413.333	257.211	4.72222	0.0605362	0.355301	0.277927	0.280779	78.0067	6.28553
	215	3-Methoxy-16-methylestra-1,3,5(10)-triene-16beta,17beta-diol 17-acetate	0.712391	275.639	359.221	0.106547	0.0812285	0.483871	0.349447	0.280823	1.3117	0.391438
	216	Leu Tyr Val	0.710826	208.404	394.233	0.595514	0.560106	2.20945	0.897537	0.427705	1.06322	0.0884363
	217	Procyanidin B2	0.708197	191.322	579.149	6.29323	0.456332	0.942227	0.237067	0.280741	13.7909	3.78564
	218	N-oleoyl taurine	0.705992	341.01	390.263	0.361235	0.252694	1.00494	0.411439	0.28613	1.42954	0.515546
	219	Spirostane-3,6-dione	0.705206	330.509	429.299	2.30057	1.27686	0.907333	0.0641689	0.280057	1.80174	0.849393
	220	Candesartan	0.699081	312.656	441.166	6.21014	0.103064	0.180207	0.322984	0.280809	60.255	5.91301
	221	Gingerglycolipid A	0.697642	410.868	677.37	0.761173	0.698298	0.0473705	0.865734	0.418899	1.09004	0.12438
	222	Nifedipine	0.696291	342.87	347.123	0.0135025	0.00450662	0.706016	0.216578	0.280717	2.99614	1.58311
	223	CRASSIN ACETATE	0.695793	223.659	377.232	3.16525	0.157116	1.94579	0.187368	0.280674	20.146	4.33242
	224	Phe Thr Asn Met	0.695163	177.821	512.215	0.0172807	0.00185921	1.42194	0.0477164	0.279735	9.29467	3.2164
	225	(6R)-1alpha,25-dihydroxyvitamin D3 6,19-sulfur dioxide adduct	0.694793	383.772	481.297	1.45255	1.36131	1.2733	0.886074	0.424562	1.06703	0.0935965
	226	Xanthine	0.688768	142.84	153.041	1.67174	1.51557	0.184882	0.8674	0.419367	1.10304	0.141484
	227	Cinobufotalin	0.688753	299.348	459.237	4.17012	1.82348	0.497202	0.479986	0.303445	2.2869	1.19339
	228	Piperettine	0.688328	390.068	312.159	1.32609	0.54004	0.176504	0.274729	0.280776	2.45553	1.29603
	229	p-Hydroxyphenylbutazone	0.686633	330.772	325.154	1.24165	0.865839	0.630913	0.390165	0.282003	1.43404	0.520088
	230	PC(18:0/0:0)	0.686513	466.613	524.37	0.903942	0.859468	0.181161	0.929223	0.436218	1.05175	0.0727857
	231	URETHANE	0.685529	30.7676	90.0554	0.873771	0.743712	1.74802	0.603439	0.340315	1.17488	0.232511
	232	Gly Trp Gly Met	0.684528	284.199	450.175	0.0670237	0.030665	0.538034	0.246726	0.280751	2.18567	1.12808
	233	N-Benzoylaspartic acid	0.678044	44.5095	238.071	1.28617	0.773917	1.49322	0.0600577	0.279993	1.6619	0.732832
	234	Met Tyr Tyr Arg	0.676058	356.024	632.287	3.63269	1.49384	1.43861	0.0446714	0.27965	2.43179	1.28202
	235	PS(O-16:0/0:0)	0.673432	240.758	484.301	1.81438	1.53161	1.34858	0.649129	0.354307	1.18462	0.24443
	236	Epithienamycin B	0.672296	184.475	313.085	0.154862	0.144236	0.845509	0.799673	0.399711	1.07367	0.102556
	237	m-(beta-Acetyl-alpha-ethyl-p-hydroxyphenethyl)benzoic acid	0.671584	317.113	313.143	2.57911	0.068783	1.19749	0.162741	0.280625	37.4964	5.22868
	238	(3R,5S,6E)-rel-7-[3-(4-fluorophenyl)-1H-indol-2-yl]-3,5-dihydroxy-6-Heptenoic acid	0.66714	325.59	370.143	8.04011	1.23283	0.376458	0.110569	0.280451	6.52164	2.70524
	239	Trichostatin A	0.662896	317.012	303.17	145.911	54.2658	1.5869	0.155039	0.280607	2.68882	1.42698
	240	13,14-epoxy Fluprostenol isopropyl ester	0.662719	316.858	517.242	3.08994	0.755534	0.422932	0.0734113	0.280175	4.08975	2.03201
	241	Metominostrobin	0.658307	366.463	285.123	0.65932	0.269017	0.930753	0.206078	0.280703	2.45085	1.29328
	242	6,8-Dihydroxypurine	0.656985	58.7217	153.041	1.73223	1.11596	0.434652	0.102429	0.280407	1.55223	0.634343
	243	1-desoxymethylsphinganine	0.655643	378.527	272.294	1.60985	1.14079	1.03723	0.31482	0.280804	1.41117	0.496892
	244	Ankorine	0.655256	276.108	336.216	0.650426	0.265927	1.5769	0.0434496	0.279612	2.44589	1.29036
	245	Ala Ala Lys Val	0.653675	193.673	388.253	1.31319	0.905458	1.15684	0.452966	0.29644	1.4503	0.536351
	246	Lys Gly Leu Met	0.65219	234.894	448.258	4.6447	0.150716	1.88426	0.226404	0.280729	30.8176	4.94568
	247	Ala Ile Gln	0.650988	196.823	331.194	2.03098	0.994911	1.97925	0.0139567	0.276732	2.04137	1.02954
	248	5'-Hydroxyhydrodolasetron	0.650534	200.761	343.173	2.841	0.35951	0.71017	0.161949	0.280623	7.90242	2.98229
	249	3,6-Dimethoxy-19-norpregna-1,3,5,7,9-pentaen-20-one	0.649605	175.583	339.184	0.815811	0.216586	1.21303	0.0831078	0.280271	3.76669	1.9133
	250	Prolylhydroxyproline	0.647409	35.982	229.118	2.18809	1.47668	0.0386018	0.521631	0.315795	1.48177	0.56732
	251	PA(22:4(7Z,10Z,13Z,16Z)/0:0)	0.646713	272.353	487.283	0.351726	0.133781	1.10683	0.216676	0.280717	2.62912	1.39458
	252	Protofarrerol	0.644523	228.725	319.128	0.573364	0.332526	0.442498	0.393358	0.282487	1.72427	0.785982
	253	Biotin sulfone	0.642533	428.495	277.086	2.93726	0.0455778	1.14151	0.17167	0.280644	64.445	6.01
	254	4-Methylene-L-glutamine	0.641779	32.0801	159.076	1.05196	0.834924	0.913482	0.505494	0.311061	1.25994	0.33336
	255	Hydroxydomperidone	0.637442	226.032	442.163	1.56897	0.774239	2.08955	0.563691	0.328343	2.02647	1.01897
	256	His Ser Cys Lys	0.632292	293.741	474.219	11.125	1.73845	1.3347	0.0689483	0.280122	6.39938	2.67793
	257	Asn Ser Phe Thr	0.63197	272.489	468.212	2.40613	1.00613	0.943937	0.213521	0.280713	2.39147	1.2579
	258	Tetrahydropentoxyline	0.628275	177.936	367.149	1.50307	0.853504	0.177123	0.0411692	0.279536	1.76106	0.816445
	259	2-(3,4-Dihydroxyphenylethyl)-6-epi-elenaiate	0.62742	174.33	379.135	1.41643	0.926832	0.199764	0.375919	0.280926	1.52824	0.611874
	260	Omeprazole sulfide	0.622679	249.903	330.126	1.19491	0.065603	0.602918	0.0389153	0.279452	18.2143	4.187
	261	Ala Leu Pro Ala	0.621934	185.685	371.228	1.65609	1.39283	2.45231	0.751777	0.385224	1.18901	0.249762
	262	PC(14:0/0:0)	0.620917	245.132	468.306	2.1606	1.78138	1.39409	0.574814	0.331667	1.21288	0.278436
	263	Isopropenyl acetate	0.619536	140.901	101.06	2.17577	2.01098	0.179618	0.867627	0.419431	1.08195	0.113628
	264	Phe Ala Leu	0.619039	196.498	350.207	0.998179	0.846578	2.11534	0.725831	0.377655	1.17907	0.237655
	265	2-Hexaprenyl-6-methoxyphenol	0.616774	438.489	533.43	1.22054	1.18706	0.236071	0.929765	0.436362	1.0282	0.0401205
	266	1-Methyl-5-imidazoleacetic acid	0.610112	44.2149	141.066	2.18497	1.6187	0.299214	0.581177	0.333557	1.34983	0.432781
	267	Asn Tyr Val Ser	0.604825	290.132	482.228	0.441109	0.370835	0.372081	0.550693	0.324556	1.1895	0.250358
	268	Palmitoyl Serinol	0.60264	381.24	330.3	1.42099	1.37083	0.113675	0.925041	0.435109	1.03659	0.0518444
	269	ESTRADIOL DIACETATE	0.601782	296.373	357.205	0.37597	0.141051	0.562964	0.168715	0.280638	2.66549	1.4144
	270	L-beta-aspartyl-L-leucine	0.59322	90.6157	247.128	1.38724	1.31366	2.21967	0.925347	0.43519	1.05601	0.0786247
	271	Sulfadimidine	0.590994	215.671	279.089	0.812475	0.101454	2.24539	0.0905368	0.28033	8.00827	3.00149
	272	Azimilide	0.589884	244.487	458.193	0.0431355	0.0188292	0.205243	0.210056	0.280709	2.29089	1.19591
	273	Gln Phe Lys	0.589302	329.171	422.243	1.35179	1.22565	1.04791	0.84508	0.413033	1.10292	0.141327
	274	3-Oxo-7alpha-hydroxy-5alpha-cholestan-26-oic acid	0.586393	325.882	433.33	1.69815	1.38846	0.0217998	0.525643	0.317001	1.22305	0.290487
	275	Phenylalanyl-Valine	0.586242	231.961	265.152	0.29394	0.288842	0.247793	0.950235	0.441725	1.01765	0.0252439
	276	Asn Val Asp Asp	0.578823	44.283	462.182	0.322966	0.23602	0.55851	0.679492	0.363603	1.36838	0.452472
	277	20-trifluoro-LTB4	0.578646	214.084	373.2	0.512692	0.249328	2.01075	0.191245	0.28068	2.05629	1.04005
	278	Kynurenic acid	0.574991	180.709	190.05	1.06977	0.826028	0.257235	0.189147	0.280677	1.29508	0.373038
	279	Palmatine	0.573726	263.009	352.154	4.76719	0.0171933	0.857293	0.113147	0.280463	277.27	8.11515
	280	Geranylbenzoquinone	0.57257	286.371	245.153	0.669987	0.0766456	0.231708	0.344593	0.280821	8.74137	3.12786
	281	Harderoporphyrinogen	0.571594	355.69	615.314	2.3702	0.869714	1.64635	0.0353047	0.279295	2.72526	1.4464
	282	benzyl 2-neohesperidosyloxy-6-hydroxybenzoate	0.562711	259.849	553.188	0.259535	0.0234701	0.838054	0.284261	0.280784	11.0581	3.46703
	283	Asn Glu Ile Pro	0.552416	264.636	472.243	1.72458	1.47924	1.25638	0.656822	0.356622	1.16585	0.221387
	284	Pandaroside B	0.545897	288.614	635.377	3.78119	3.44729	0.163652	0.876501	0.42191	1.09686	0.133381
	285	PGF2alpha serinol amide	0.545711	305.925	428.3	0.449291	0.19638	0.00107968	0.344113	0.280821	2.28786	1.194
	286	PC(O-2:0/2:0)	0.544742	186.737	328.154	4.43351	0.241357	1.7481	0.200435	0.280695	18.3691	4.19921
	287	Dendroamide A	0.542149	135.141	511.114	0.126333	3.57604e-05	0.822908	0.325887	0.280811	3532.76	11.7866
	288	Plastoquinone 3	0.53722	316.862	341.247	1.45193	0.664115	1.54156	0.00731526	0.27297	2.18626	1.12847
	289	5-Aminosalicylic Acid	0.535407	154.655	154.05	1.44013	1.25888	0.483009	0.717817	0.375281	1.14398	0.194064
	290	His Glu Thr Tyr	0.52921	222.484	549.226	0.550999	0.0768977	1.6258	0.262798	0.280766	7.16536	2.84104
	291	Palmitoleamide	0.525915	337.22	254.247	1.80439	1.66243	0.416191	0.876436	0.421892	1.08539	0.118219
	292	O-butanoyl-carnitine	0.523036	207.512	232.154	1.94975	1.91953	1.15942	0.95508	0.442979	1.01574	0.0225342
	293	Gly Trp Trp Thr	0.519977	255.521	549.248	0.0695764	0.0249984	0.291301	0.27988	0.28078	2.78323	1.47676
	294	Riddelline	0.51367	189.596	350.163	0.542337	0.012067	1.30958	0.0562649	0.279926	44.9439	5.49005
	295	Met Arg Gly Met	0.51073	163.064	494.22	0.0449649	0.00986032	1.42848	0.146286	0.280584	4.56018	2.18909
	296	Cappariloside A	0.504266	167.072	335.123	1.00035	0.957794	0.305694	0.835862	0.410376	1.04443	0.0627119
	297	Poinsettifolin B	0.495199	257.475	475.246	0.527141	0.232143	0.894438	0.404716	0.284525	2.27076	1.18318
	298	Ozagrel	0.492499	195.75	229.097	1.48091	0.977972	0.53929	0.160803	0.280621	1.51427	0.598618
	299	His Pro Met Ala	0.481089	317.944	455.206	4.1276	0.653463	0.159148	0.314333	0.280804	6.3165	2.65912
	300	ponasterone A	0.479294	235.983	465.32	3.65687	3.48246	0.45154	0.957637	0.443639	1.05008	0.0705012
	301	1,2-Dihydroxytacrine	0.478798	196.536	231.113	1.6425	1.62102	1.45556	0.961541	0.444644	1.01325	0.0189918
	302	Talbutal	0.472783	168.895	253.152	3.51717	2.40187	0.894905	0.507343	0.311612	1.46435	0.550259
	303	6beta-Testosterone Enanthate	0.468859	517.376	417.299	0.868299	0.789977	0.154418	0.727183	0.378054	1.09915	0.136383
	304	PA(20:4(5Z,8Z,11Z,14Z)/0:0)	0.468551	320.627	459.251	1.40393	0.232995	1.21691	0.280013	0.28078	6.02556	2.59109
	305	17-trifluoromethylphenyl-13,14-dihydro trinor Prostaglandin F1alpha	0.46228	314.618	461.252	4.31022	0.947324	0.383654	0.206248	0.280703	4.54989	2.18583
	306	Sophoracoumestan A	0.458686	342.594	335.094	0.00952667	0.00532579	0.923459	0.499956	0.309401	1.78878	0.838977
	307	LPA(P-16:0e/0:0)	0.458448	476.01	395.255	2.43678	0.788391	0.464812	0.0730239	0.280171	3.09083	1.62799
	308	Fesoterodine	0.457737	270.435	412.284	0.47376	0.397542	1.3362	0.769796	0.390631	1.19172	0.253049
	309	Levobunolol glucuronide	0.45149	231.696	468.215	0.192065	0.158417	1.05489	0.747892	0.384076	1.2124	0.277868
	310	gamma-Glutamyl-beta-(isoxazolin-5-on-2-yl)alanine	0.450838	178.308	302.095	0.341272	0.124181	1.0115	0.116495	0.280478	2.74818	1.45848
	311	2-(4-amino-5-chloro-2-methoxybenzamido)acetic acid	0.450342	139.452	259.049	0.169303	0.00228788	0.72591	0.329292	0.280813	74.0001	6.20946
	312	Myxalamid A	0.44872	342.618	416.315	0.637654	0.52368	0.533891	0.77072	0.390906	1.21764	0.284088
	313	Asn Arg Met Met	0.441424	164.396	551.241	0.0528027	0.00604366	1.27351	0.129172	0.280529	8.73689	3.12712
	314	Glu Asn Leu Leu	0.439204	191.296	488.271	1.37798	0.657021	2.84764	0.184329	0.280669	2.09731	1.06854
	315	Licoagrocarpin	0.434726	448.846	339.157	0.493906	0.165055	0.548961	0.179431	0.28066	2.99238	1.58129
	316	Asp Met Gly	0.432305	246.726	322.107	5.05602	0.0925866	1.23207	0.27519	0.280777	54.6085	5.77105
	317	I-Urobilin	0.417314	475.722	591.316	2.65629	2.06936	0.86457	0.560542	0.327433	1.28363	0.360234
	318	Flavonol 3-O-(6-O-malonyl-beta-D-glucoside)	0.414447	157.884	487.117	0.0542494	0.0456785	0.711048	0.878738	0.422532	1.18764	0.248092
	319	1alpha-hydroxy-18-[m-(1-hydroxy-1-ethylpropyl)-benzyloxy]-23,24,25,26,27-pentanorvitamin D3	0.380016	267.022	523.373	0.105406	0.0347318	0.365915	0.0785074	0.280228	3.03486	1.60163
down	320	L-CARNITINE	0.999916	32.5314	162.112	0.372405	0.395532	0.0587373	0.908184	0.430594	0.941529	-0.0869218
	321	Neurine	0.999826	30.4431	104.107	0.45745	1.32211	0.64432	0.110314	0.280449	0.346	-1.53116
	322	5-AMINOPENTANOATE	0.999759	37.0045	118.086	0.582219	0.990651	0.0752717	0.183571	0.280667	0.587713	-0.766816
	323	Creatine	0.999678	34.4879	132.077	0.259573	0.482919	0.20738	0.288013	0.280786	0.53751	-0.895638
	324	1-Butylamine	0.999648	319.536	74.0971	1.65381	3.77552	0.061142	0.373794	0.280897	0.438035	-1.19088
	325	Isonicotinic acid	0.999458	36.0809	124.039	1.74905	2.83938	1.09555	0.391411	0.282193	0.615996	-0.699006
	326	S-Adenosyl-methionine	0.999335	31.2806	399.144	0.768083	3.13657	0.915876	0.219247	0.280721	0.24488	-2.02985
	327	DL-Tryptophan	0.998897	143.268	205.108	0.537821	2.67048	0.2922	0.342349	0.28082	0.201394	-2.3119
	328	Maltose	0.998887	33.5187	365.105	0.729253	2.49813	1.13315	0.0944714	0.280358	0.29192	-1.77636
	329	Deisopropylatrazine	0.998826	182.131	174.055	7.51553	55.0222	0.710106	0.314427	0.280804	0.136591	-2.87207
	330	alpha-methylphenylalanine	0.998686	232.883	180.102	1.1004	1.12267	0.0333561	0.940142	0.439093	0.980163	-0.0289065
	331	Fusaric acid	0.998409	303.173	180.102	1.02246	1.09406	0.437995	0.843432	0.41256	0.934557	-0.0976461
	332	4',5,7-trihydroxyflavanone	0.998406	228.395	273.075	0.202262	0.276684	0.999304	0.710918	0.373218	0.731019	-0.452018
	333	(+)-3-Carene	0.99831	2.84428	137.132	1.33353	2.93729	0.231096	0.342688	0.28082	0.454001	-1.13923
	334	Pyrrolidine	0.997732	38.9516	72.0814	0.716521	0.782946	0.978191	0.828692	0.408293	0.91516	-0.127904
	335	5-Hydroxy-2',3',7,8-tetramethoxyflavone	0.997511	234.384	359.112	2.20179	2.86129	0.566898	0.545296	0.322958	0.76951	-0.377989
	336	Choline	0.997486	418.139	104.107	0.617921	1.05048	0.378299	0.204326	0.280701	0.588227	-0.765555
	337	TRYPTAMINE	0.997285	185.032	161.107	0.419683	0.758727	0.613209	0.238807	0.280743	0.553141	-0.854281
	338	Butylamine	0.997184	642.949	74.0971	1.19556	3.45534	1.06358	0.316795	0.280805	0.346005	-1.53114
	339	Capsaicin	0.997055	365.347	306.206	0.489473	3.80535	2.93493	0.038083	0.279418	0.128628	-2.95873
	340	Picolinic acid	0.996881	56.9745	124.039	1.24539	1.29314	0.243597	0.768753	0.390321	0.963068	-0.0542901
	341	PGH1	0.99683	378.481	337.234	1.034	1.68813	0.597939	0.230937	0.280735	0.61251	-0.707195
	342	Aspartic acid	0.996558	38.9668	134.045	1.42776	4.01908	0.790223	0.328701	0.280812	0.355247	-1.49311
	343	Canrenone	0.996159	224.984	341.212	5.1199	7.59068	0.0466973	0.648915	0.354242	0.674498	-0.568114
	344	Arg Lys Gln	0.99613	343.678	431.276	0.334501	0.755687	0.589158	0.0487881	0.279763	0.442645	-1.17578
	345	Isoleucine	0.996076	135.101	132.102	0.926289	1.47193	0.868761	0.51538	0.31398	0.629304	-0.66817
	346	Indole-3-carboxylic acid	0.995863	164.588	162.055	1.39728	1.54903	0.00811487	0.718511	0.375487	0.90204	-0.148737
	347	Camelinin	0.995797	44.0335	262.128	0.982061	2.65734	0.470765	0.121345	0.280499	0.369566	-1.4361
	348	Chrysin	0.995386	266.341	255.065	0.563744	1.94548	0.118168	0.108574	0.280441	0.289772	-1.78701
	349	Paracetamol	0.995335	188.198	152.071	0.634919	1.00272	0.67975	0.347196	0.280822	0.633197	-0.659273
	350	Nervonyl carnitine	0.995229	558.364	102.128	1.6877	4.04537	0.237737	0.323775	0.28081	0.417192	-1.26122
	351	2-Phenylethylamine	0.994962	163.772	122.097	0.0850679	0.151815	0.262915	0.238456	0.280743	0.560339	-0.835628
	352	2-(Phenylethenyl)-1,3-dioxolane	0.994843	347.101	177.091	0.12604	0.726842	1.17232	0.261206	0.280765	0.173408	-2.52775
	353	Halaminol A	0.994721	452.842	228.232	1.32454	2.20541	0.483078	0.464715	0.299505	0.600585	-0.735559
	354	Palmitic amide	0.994702	496.61	256.263	1.26149	2.16449	0.161721	0.447948	0.295103	0.582811	-0.778899
	355	Thr Ser Gly	0.994605	34.6312	264.108	0.430829	0.531534	0.309865	0.656759	0.356603	0.81054	-0.303044
	356	1-naphthylamine	0.994526	185.031	144.081	0.495017	0.731364	0.355383	0.368592	0.280832	0.676841	-0.56311
	357	Phenylalanine	0.994483	147.929	166.086	0.561123	1.63857	1.59167	0.422011	0.288585	0.342447	-1.54605
	358	Gln Glu	0.994392	35.0701	276.119	1.36283	1.64478	1.15191	0.602706	0.340085	0.828575	-0.271296
	359	Indoleacetic acid	0.994059	256.648	176.071	0.902097	1.34827	0.213004	0.507616	0.311693	0.669079	-0.579751
	360	Histidine	0.993835	29.1674	156.077	0.261162	0.6031	0.0652023	0.172694	0.280647	0.433034	-1.20745
	361	6-Deoxyfagomine	0.993466	34.6737	132.102	0.934619	2.05974	0.885947	0.298422	0.280794	0.453755	-1.14001
	362	Tyr Met	0.99316	167.812	313.121	1.24181	2.67904	1.73073	0.482557	0.304161	0.463529	-1.10927
	363	allopurinol	0.99272	45.2505	137.046	1.1092	1.40842	0.0975389	0.499341	0.309216	0.787547	-0.344563
	364	Tridecyl phloretate	0.992707	460.167	349.273	1.57311	6.61616	0.0786529	0.29955	0.280794	0.237768	-2.07237
	365	2-Linoleoyl Glycerol	0.992591	481.346	355.283	1.33707	3.86892	0.69791	0.354631	0.280826	0.345593	-1.53286
	366	REBAMIPIDE	0.99258	272.662	371.079	0.00355071	0.00711322	0.630212	0.185597	0.280671	0.49917	-1.0024
	367	6-keto Testosterone Enanthate	0.992418	399.224	415.281	1.2573	1.50349	0.930524	0.470668	0.301022	0.836253	-0.257989
	368	(4Z,7Z,10Z,13Z,16Z,19Z)-Docosahexaenoic acid ethyl ester	0.992403	367.077	357.278	1.55579	1.71597	1.11326	0.692066	0.367494	0.906651	-0.14138
	369	CREATININE	0.992358	33.1319	114.066	0.424912	1.25456	0.245983	0.313883	0.280804	0.338694	-1.56194
	370	11(12)-EET	0.992309	469.371	343.221	1.03129	4.25129	0.591938	0.326605	0.280811	0.242583	-2.04345
	371	3-amino-2-naphthoic acid	0.991851	193.502	188.071	3.20188	5.08655	1.49761	0.465297	0.299654	0.629479	-0.66777
	372	Tyr-OEt	0.99137	182.571	210.112	1.53002	1.88739	0.348949	0.562644	0.328041	0.810653	-0.302843
	373	Ornithine	0.990825	31.9696	133.097	0.514023	1.57334	0.479175	0.328575	0.280812	0.326707	-1.61393
	374	Taurine	0.990807	30.6136	126.022	0.799648	1.12136	0.652236	0.459173	0.298071	0.713106	-0.487812
	375	N-Methyl-2-pyrrolidinone	0.990695	147.775	100.076	0.765259	0.924368	0.356232	0.601148	0.339599	0.827872	-0.272521
	376	Thr Ile	0.990242	36.1732	233.149	2.24555	2.4375	0.207036	0.821186	0.406097	0.921253	-0.11833
	377	Kukoamine A	0.989962	166.137	531.317	0.0461597	155.235	0.769871	0.325119	0.28081	0.000297354	-11.7155
	378	Leu Ile	0.989848	191.066	245.186	1.36112	1.37066	2.39063	0.991377	0.452202	0.993037	-0.0100802
	379	Guanosine	0.989486	134.364	284.099	1.01385	2.29517	0.958062	0.154041	0.280604	0.441732	-1.17876
	380	L-Cyclo(alanylglycyl)	0.989424	34.4902	129.055	0.393191	0.962226	0.877757	0.127553	0.280523	0.408626	-1.29115
	381	Hypoxanthine	0.989228	58.6294	137.046	1.1492	1.34742	0.0226087	0.606916	0.341398	0.85289	-0.229569
	382	Ala Trp	0.989118	142.358	276.132	3.5756	2654.69	0.914879	0.32538	0.28081	0.0013469	-9.53614
	383	GLYCOCHENODEOXYCHOLIC ACID	0.988153	353.63	450.32	0.414268	1.23278	1.26145	0.123927	0.280509	0.336044	-1.57328
	384	Styrene	0.98812	163.573	105.07	0.0900886	0.125188	0.411973	0.484254	0.30464	0.719627	-0.474678
	385	3-Indolepropionic acid	0.988007	280.692	190.086	1.35138	4.26124	0.99388	0.208525	0.280707	0.317133	-1.65684
	386	PE(16:0/0:0)	0.987789	414.406	454.292	1.18	2.13233	1.13207	0.262687	0.280766	0.553386	-0.853642
	387	Atorvastatin	0.987374	373.461	559.259	0.0115129	2.59383	1.56884	0.210393	0.280709	0.00443856	-7.81569
	388	9-hydroxy-10-chloro-octadecanoic acid	0.987126	320.601	335.236	0.414568	0.548596	0.364756	0.657539	0.356837	0.755689	-0.404136
	389	Aspalatone	0.987099	271.079	289.07	0.269713	1.81864	1.06939	0.0483914	0.279753	0.148305	-2.75336
	390	Docosahexaenoic Acid ethyl ester	0.986984	504.928	357.278	1.37224	3.59332	0.496062	0.391285	0.282174	0.381887	-1.38878
	391	cis-9,10-Epoxystearic acid	0.986883	469.317	321.239	1.03175	3.87576	0.445152	0.298962	0.280794	0.266205	-1.90939
	392	p-Mentha-1,3,8-triene	0.986859	399.227	135.117	1.25603	1.52044	0.936325	0.49485	0.307853	0.826094	-0.275622
	393	Ala Tyr Trp Lys	0.986516	498.278	567.295	0.502956	7.17828	0.714428	0.319559	0.280807	0.0700663	-3.83513
	394	Prostaglandin I2	0.986392	302.851	353.229	1.18838	2.2395	0.150885	0.161097	0.280621	0.530644	-0.914183
	395	Indole	0.985983	315.617	118.065	1.51137	2.86546	0.533971	0.458352	0.297857	0.527443	-0.922912
	396	Tyr Pro	0.984708	183.292	279.137	5.33224	10.8975	0.894469	0.15035	0.280595	0.489309	-1.03118
	397	2,5-Dihydro-2,4,5-trimethyloxazole	0.984689	35.6344	114.092	1.00777	1.16119	0.502018	0.768523	0.390252	0.86787	-0.204449
	398	5-(3',5'-Dihydroxyphenyl)-gamma-valerolactone	0.984595	176.809	209.081	0.961079	4.19947	0.590063	0.159683	0.280618	0.228857	-2.12748
	399	Phe Asp Ala Glu	0.984465	147.889	481.188	0.980265	2.59805	1.16163	0.164549	0.280629	0.377307	-1.40619
	400	Mycophenolate mofetil	0.983866	271.549	434.217	0.0031674	0.111894	0.998865	0.314702	0.280804	0.0283072	-5.14269
	401	Tyr Phe	0.983827	188.536	329.149	1.53345	3.85664	1.43403	0.443331	0.293856	0.397612	-1.33057
	402	Apigenin	0.983614	295.482	271.06	0.776377	2.23913	0.0688529	0.220762	0.280723	0.346732	-1.52811
	403	3-acetamidobutanal	0.982911	38.2048	130.086	0.805211	1.0789	0.363528	0.36202	0.280829	0.746323	-0.422127
	404	Bilirubin	0.982283	572.614	585.269	0.30441	0.394151	0.205056	0.37192	0.280871	0.772319	-0.372732
	405	Uracil	0.981934	61.8933	113.035	1.61789	2.68098	1.20149	0.141044	0.280568	0.603469	-0.72865
	406	m-Tyrosine	0.981863	214.875	182.081	20.4836	29.1779	1.21224	0.356752	0.280827	0.702023	-0.510409
	407	Dimethylsulfoxide	0.9818	42.6444	79.0185	0.191372	1.14215	0.161092	0.338379	0.280818	0.167554	-2.5773
	408	2-amino-octadecanoic acid	0.981561	480.007	300.289	1.11629	1.8661	0.630019	0.420967	0.288346	0.598193	-0.741318
	409	Phenylacetaldehyde	0.981541	105.323	121.065	0.180487	0.290582	0.315251	0.460472	0.298409	0.621122	-0.687051
	410	Linoleamide	0.981275	353.504	280.263	1.06614	6.55137	0.915655	0.311466	0.280802	0.162735	-2.6194
	411	3-Amino-3-(4-hydroxyphenyl)propanoate	0.981233	67.4198	182.081	0.904745	1.46738	1.50201	0.515167	0.313918	0.616571	-0.697661
	412	Glycocholic Acid	0.981091	308.986	466.315	0.0599874	0.246855	1.44925	0.132585	0.280541	0.243007	-2.04093
	413	Indole-3-carboxaldehyde	0.980629	248.273	146.06	0.560738	1.5943	1.97061	0.187135	0.280673	0.351714	-1.50753
	414	Dibutyl phthalate	0.980162	450.031	279.159	1.19969	3.04002	0.697282	0.334187	0.280815	0.394632	-1.34142
	415	1-Penten-3-ol	0.979506	3.03281	87.0809	1.27638	1.91095	0.0811408	0.379595	0.281094	0.667929	-0.582233
	416	6,10,14-Trimethyl-5,9,13-pentadecatrien-2-one	0.978927	436.482	263.237	0.642977	1.26829	0.323631	0.354584	0.280826	0.506963	-0.980049
	417	Oxprenolol	0.978556	298.928	266.172	0.886865	2.29805	1.18609	0.271976	0.280774	0.385921	-1.37362
	418	Ala Leu Ile	0.978484	207.78	316.223	2.13209	4.66338	1.91493	0.510755	0.312622	0.457199	-1.12911
	419	Ser Glu Leu	0.978409	168.124	348.176	0.817504	0.835816	2.70878	0.97128	0.447134	0.978091	-0.0319598
	420	Ala Phe Val Lys	0.978174	320.332	464.282	0.0351482	0.162154	0.714622	0.210184	0.280709	0.216758	-2.20584
	421	Myriocin-12-en	0.978019	279.644	400.269	0.0956778	0.282428	0.327372	0.135953	0.280552	0.338769	-1.56163
	422	Phe Phe	0.977937	218.648	313.154	2.41962	2.47424	1.96566	0.979871	0.449312	0.977925	-0.0322049
	423	Boviquinone 4	0.977924	401.288	413.265	1.31285	1.43635	0.854399	0.748771	0.384328	0.914017	-0.129707
	424	Erogorgiaene	0.976361	434.7	271.242	0.525495	84.6566	1.47651	0.319146	0.280807	0.00620738	-7.3318
	425	Dextromethorphan	0.97632	380.261	272.2	0.198511	0.204057	0.388735	0.983699	0.450276	0.972823	-0.0397505
	426	9-HODE	0.975703	421.846	279.231	1.85222	2.31514	0.403026	0.689298	0.366643	0.800048	-0.321842
	427	Isoleucyl-Threonine	0.9751	108.269	233.149	1.36518	1.90686	1.89737	0.672866	0.361528	0.715932	-0.482106
	428	Hyperforin	0.974867	268.854	537.389	0.154474	0.357819	0.872013	0.119629	0.280492	0.43171	-1.21187
	429	Sugeonyl acetate	0.974736	438.786	277.179	1.22369	3.17145	0.777435	0.328702	0.280812	0.385845	-1.37391
	430	(22E)-3alpha,12alpha-Dihydroxy-5beta-chol-22-en-24-oic Acid	0.974587	355.87	391.283	1.02316	1.86724	1.25492	0.0346988	0.279265	0.547953	-0.867877
	431	6-[3]-ladderane-1-hexanol	0.974467	554.185	263.237	1.67605	14.3055	1.6182	0.308129	0.2808	0.117161	-3.09344
	432	Leu Lys Gly Phe	0.974459	286.674	464.282	0.180725	0.218731	0.653954	0.704828	0.371384	0.826243	-0.275362
	433	Dimethylbenzyl carbinyl hexanoate	0.973937	306.949	249.185	1.27508	2.97964	1.20022	0.227522	0.280731	0.427932	-1.22455
	434	delta3,5-Deoxytigogenin	0.973681	407.231	397.309	1.46823	1.56242	0.160196	0.825715	0.407424	0.939716	-0.0897028
	435	3'-Methoxy-[6]-Gingerdiol 3,5-diacetate	0.973124	447.597	412.268	0.123508	0.932814	0.938562	0.216089	0.280717	0.132404	-2.91698
	436	alpha-Methylstyrene	0.973115	376.661	119.086	1.0439	2.76721	0.862127	0.312365	0.280803	0.377238	-1.40645
	437	9Z,12Z,15Z-Octadecatrienal	0.972792	481.361	263.237	1.31464	2.55366	0.358621	0.399066	0.283337	0.514807	-0.957896
	438	Leu Pro	0.972789	168.227	229.154	0.966983	1.01344	2.00004	0.937798	0.438478	0.954158	-0.0677004
	439	5-propylideneisolongifolane	0.972676	459.689	247.242	1.14836	2.02283	0.204087	0.313183	0.280803	0.567699	-0.816803
	440	25-hydroxy-16,17-didehydrovitamin D3	0.972477	297.899	399.321	1.17146	1.226	0.905686	0.868238	0.419602	0.955511	-0.0656557
	441	Asn Leu	0.972061	149.586	246.145	0.989042	2.03426	1.36206	0.495738	0.308124	0.486192	-1.0404
	442	PE(18:1(9Z)/0:0)	0.97202	425.492	480.308	0.962113	1.61095	1.66978	0.241491	0.280746	0.597235	-0.74363
	443	Octanoylcarnitine	0.971751	269.624	288.217	0.0074405	0.0534931	0.366144	0.130032	0.280532	0.139093	-2.84588
	444	DL-Stearoylcarnitine	0.97108	433.053	428.373	1.18196	1.73109	0.162507	0.52375	0.316416	0.682783	-0.550501
	445	Sorbitan oleate	0.97051	459.659	429.318	0.915862	1.07082	0.123351	0.602601	0.340053	0.855287	-0.225519
	446	Clindamycin	0.970296	206.466	425.187	1.40421	1.77299	0.452632	0.575777	0.331954	0.792003	-0.336421
	447	Met Phe His	0.970229	140.621	434.188	1.10442	2.20785	0.83022	0.318494	0.280806	0.500226	-0.999348
	448	L-Saccharopine	0.970184	32.1561	277.139	3.06662	4.0722	0.208965	0.655218	0.356141	0.753062	-0.409159
	449	Xanthosine	0.969568	143.892	285.083	0.719836	2.21234	1.37178	0.298261	0.280794	0.325373	-1.61983
	450	N-omega-Acetylhistamine	0.968884	44.2182	154.097	1.01449	10.2426	0.0809872	0.315188	0.280804	0.0990464	-3.33575
	451	2alpha-hydroxyvitamin D3	0.968325	280.77	401.337	1.26987	1.42469	0.588	0.719059	0.37565	0.891332	-0.165965
	452	trans-Hexadec-2-enoyl carnitine	0.968232	385.252	398.326	0.541485	0.738986	0.867715	0.474608	0.302013	0.732741	-0.448625
	453	Leukotriene D4 methyl ester	0.96813	272.14	511.283	0.296948	0.565735	0.44544	0.557861	0.326655	0.52489	-0.929914
	454	Lysine	0.968008	27.4266	147.113	0.715298	1.81584	0.947682	0.407806	0.285267	0.39392	-1.34402
	455	[12]-Gingerol	0.967859	367.779	396.31	0.32713	0.694817	0.135098	0.245845	0.28075	0.470816	-1.08677
	456	Ile Tyr Lys Asp	0.967849	512.101	538.288	1.60412	4.48445	0.438516	0.425259	0.289323	0.357708	-1.48315
	457	L-beta-aspartyl-L-phenylalanine	0.967592	146.788	281.113	1.37005	2.33429	0.588221	0.45201	0.296187	0.586923	-0.768758
	458	5,12-DiHETE	0.96672	409.622	319.226	1.32649	2.50139	1.64053	0.122907	0.280505	0.530303	-0.915111
	459	1,7-Dimethyluric acid	0.966523	166.22	197.067	1.79806	4.16223	1.02377	0.193707	0.280684	0.431995	-1.21091
	460	Ala Val Gly Ala	0.966233	160.554	317.181	1.25228	1.92885	2.13808	0.648345	0.35407	0.649235	-0.623187
	461	4-Aminomethylcyclohexanecarboxylic acid	0.965642	192.527	158.118	8.7341	21.4411	1.74359	0.168371	0.280638	0.407353	-1.29565
	462	2,4-Imidazolidinedione, 5-(7-oxabicyclo[4.1.0]hepta-2,4-dien-3-yl)-5-phenyl-	0.965584	134.246	269.088	1.29503	2.8439	1.8898	0.120383	0.280495	0.455371	-1.13488
	463	(Z)-N-(2-hydroxyethyl)hexadec-7-enamide	0.964999	367.569	298.274	1.21943	2.19344	0.58934	0.320104	0.280807	0.555947	-0.846982
	464	Oleamide	0.964506	369.789	282.279	1.58788	1.86288	0.351621	0.766898	0.389768	0.852377	-0.230437
	465	Mycophenolic acid	0.964431	221.249	321.133	0.12284	0.457506	0.0610934	0.34036	0.280819	0.268498	-1.89702
	466	Melleolide M	0.964159	376.711	453.166	0.885345	3.23796	0.78192	0.311162	0.280802	0.273427	-1.87077
	467	Diacetylmonoxime	0.963234	31.4609	102.055	0.929873	1.18563	0.448457	0.612054	0.342989	0.784283	-0.350553
	468	Val Thr Val	0.962618	189.012	318.202	1.20153	2.20777	2.45443	0.568747	0.329846	0.544229	-0.877715
	469	PE(17:0/0:0)	0.961561	436.293	468.308	1.14249	1.74748	1.44062	0.239788	0.280744	0.653791	-0.613099
	470	25-Hydroxy[26,27-methyl]vitamin D3 3beta-(1,2-epoxypropyl)ether	0.96156	474.408	443.351	1.44226	1.4699	0.0620444	0.938002	0.438532	0.981201	-0.0273799
	471	cholesta-4,6-dien-3-one	0.961028	402.392	383.33	1.164	1.50711	0.490938	0.570378	0.330337	0.772341	-0.37269
	472	1(3)-glyceryl-PGD2	0.960944	293.845	427.266	1.36703	1.39049	0.18638	0.954581	0.442851	0.983128	-0.0245488
	473	Febuxostat	0.959792	389.003	317.095	0.0052616	0.238	0.757902	0.326066	0.280811	0.0221075	-5.49932
	474	N-oleoyl phenylalanine	0.958874	255.431	430.331	0.847847	1.6077	2.1241	0.22293	0.280725	0.527366	-0.923122
	475	PC(14:0/O-1:0)	0.958232	425.59	482.313	1.37199	1.95919	1.39622	0.425829	0.289451	0.700283	-0.513989
	476	6-C-Methylquercetin 3,3'-dimethyl ether	0.957536	275.343	345.096	1.28438	3.22226	0.0509083	0.36338	0.28083	0.398594	-1.32701
	477	PE(18:0/0:0)	0.957084	459.794	482.323	1.08981	1.40301	0.242813	0.585102	0.334713	0.776765	-0.36445
	478	1-(beta-D-Ribofuranosyl)-1,4-dihydronicotinamide	0.957066	142.015	257.113	0.314399	0.704815	0.862405	0.15038	0.280595	0.446073	-1.16465
	479	Urolithin C	0.956845	240.427	245.044	0.658958	8.65573	0.380248	0.169856	0.280641	0.0761296	-3.7154
	480	Limonene aldehyde	0.95642	309.913	167.143	1.62509	5.68468	1.0236	0.302454	0.280796	0.285872	-1.80656
	481	Flavidulol C	0.956178	458.343	515.313	1.37301	1.58611	0.174916	0.603224	0.340247	0.865649	-0.208146
	482	Ursodeoxycholic acid	0.955418	368.896	375.288	1.50771	1.7436	1.22026	0.563204	0.328202	0.864713	-0.209707
	483	Corey PG-Lactone Diol	0.954938	200.621	269.174	1.72795	2.70616	1.03062	0.489068	0.306081	0.638526	-0.647183
	484	His Val His Gly	0.954859	264.767	449.226	0.879599	2.13014	0.333975	0.286146	0.280785	0.41293	-1.27603
	485	3-keto Petromyzonol	0.954147	399.158	375.289	1.31877	1.50363	1.08689	0.56307	0.328164	0.877061	-0.189251
	486	Isopropyl beta-D-ThiogalactoPyranoside	0.953601	2.52829	239.095	1.34318	3.35916	0.761348	0.331141	0.280814	0.399856	-1.32245
	487	PC(O-16:1(11Z)/2:0)	0.953498	429.628	522.354	1.00149	1.35608	0.313032	0.649373	0.354381	0.738519	-0.437293
	488	Imidazolone	0.953291	602.869	85.0401	1.29359	2.58872	0.216252	0.364084	0.28083	0.499703	-1.00086
	489	5-cis Carbaprostacyclin	0.953266	437.392	333.242	0.0859144	1.18252	1.44213	0.243878	0.280748	0.0726537	-3.78282
	490	Sucrose octaacetate	0.953076	327.858	679.204	0.000164513	0.00101675	0.342113	0.318685	0.280807	0.161802	-2.6277
	491	Phe Thr	0.953	145.241	267.134	1.20219	2.35535	1.12482	0.481243	0.303794	0.510409	-0.970275
	492	Aminoacetone	0.952983	651.664	74.0607	1.2245	3.11925	0.572811	0.335913	0.280816	0.392564	-1.349
	493	Lys Phe Gly Thr	0.952246	325.872	452.259	0.679069	353.436	0.95745	0.325397	0.28081	0.00192133	-9.02368
	494	Miraxanthin-V	0.951258	203.352	347.123	0.635456	1.22486	1.10173	0.353131	0.280825	0.5188	-0.946749
	495	4-Formyl-antipyrine	0.951182	191.177	217.097	1.66754	1.68386	0.532067	0.979031	0.449099	0.99031	-0.0140485
	496	N4-Acetylcytidine	0.950247	245.515	286.1	0.245987	6.59366	2.03812	0.306068	0.280799	0.0373066	-4.74442
	497	Idazoxan	0.95017	173.232	205.097	0.257162	0.307194	0.66987	0.684765	0.365242	0.837132	-0.256473
	498	Asn Thr Asp Asp	0.949363	223.92	464.159	0.0149685	0.0191473	0.57027	0.538824	0.32102	0.781754	-0.355213
	499	Erycristin	0.948211	196.578	407.22	0.473128	0.899033	0.494556	0.549454	0.32419	0.526263	-0.926144
	500	Proline betaine	0.948044	36.0251	144.102	0.930789	2.24773	1.66526	0.12659	0.280519	0.414102	-1.27194
	501	Leucyl-leucyl-norleucine	0.946506	228.66	358.269	1.63851	1.96858	2.56689	0.809034	0.402506	0.832332	-0.264768
	502	Methyl linoleate	0.946402	554.226	295.263	1.6742	13.8842	1.75217	0.306958	0.280799	0.120583	-3.0519
	503	1-Linoleoylglycerophosphocholine	0.945912	361.947	520.341	0.950499	1.16155	0.153133	0.597606	0.3385	0.818302	-0.289294
	504	Palmitoleoyl-EA	0.945043	353.316	298.274	1.13714	6.28058	0.84555	0.322395	0.280809	0.181057	-2.46549
	505	DErySphingosine	0.944287	368.573	300.289	1.55855	1.75892	0.545252	0.828368	0.408199	0.886083	-0.174486
	506	2-Aminopyridine	0.944163	534.942	95.0608	1.08014	2.80681	1.03581	0.280375	0.280781	0.384829	-1.37771
	507	Hydantoin	0.942759	654.308	101.035	1.24385	3.68851	0.571401	0.335448	0.280816	0.337224	-1.56822
	508	Aureusidin	0.942433	273.305	287.054	1.26621	5.74064	1.78922	0.232468	0.280736	0.22057	-2.18069
	509	6-Benzylaminopurine	0.94153	133.255	226.107	1.75423	5.3423	1.46313	0.161984	0.280623	0.328365	-1.60663
	510	Thalicsessine	0.941213	294.302	370.209	2.4205	3.40358	0.208913	0.632942	0.349355	0.711161	-0.491751
	511	Raclopride	0.940778	57.9151	347.094	0.923718	2.61385	0.183478	0.131153	0.280536	0.353393	-1.50065
	512	Piperyline	0.940166	290.378	272.128	0.464798	0.576514	0.544189	0.538754	0.320999	0.806222	-0.310752
	513	dodecanamide	0.940156	404.219	200.201	1.13962	2.50824	0.897666	0.343275	0.28082	0.45435	-1.13813
	514	Pregnan-20-one, 17-(acetyloxy)-3-hydroxy-6-methyl-, (3b,5b,6a)-	0.940148	261.119	391.284	0.40581	1.17467	0.639131	0.0707764	0.280145	0.345467	-1.53338
	515	Lys Pro Pro Glu	0.939474	248.726	470.264	0.873669	1.39262	0.668787	0.333966	0.280815	0.627356	-0.672643
	516	Met Met Lys Lys	0.938004	512.173	537.284	1.64916	4.44101	0.431522	0.431621	0.290746	0.371347	-1.42916
	517	15R-PGD2	0.937485	332.418	353.229	1.21818	1.71525	0.9832	0.136473	0.280554	0.710208	-0.493687
	518	Isovaleric acid	0.937119	53.471	103.076	1.35017	3.04153	0.312302	0.343168	0.28082	0.443913	-1.17165
	519	Asn Ile Ser Asp	0.936984	156.065	448.204	0.891018	1.2604	0.29928	0.464907	0.299554	0.706934	-0.500352
	520	(3b,4b,11b,14b)-11-Ethoxy-3,4-epoxy-14-hydroxy-12-cyathen-15-al 14-xyloside	0.936672	202.946	495.288	1.4856	2.01833	0.938822	0.63955	0.35139	0.736051	-0.442123
	521	LysoPE(15:0/0:0)	0.934717	392.915	440.276	1.08342	1.83676	0.838622	0.28853	0.280787	0.589855	-0.761567
	522	Leu Pro Val His	0.934652	286.626	465.285	0.500409	2.03614	1.45199	0.247632	0.280752	0.245764	-2.02466
	523	Irbesartan	0.933378	306.755	429.239	0.00505358	1.00104	0.653337	0.322106	0.280809	0.00504835	-7.62997
	524	ALANYL-dl-PHENYLALANINE	0.933331	173.447	237.123	1.19631	94.1812	0.679884	0.32795	0.280812	0.0127022	-6.29877
	525	Dinorcapsaicin	0.932912	291.468	278.175	1.06071	1.95302	1.004	0.333657	0.280815	0.543112	-0.880677
	526	Norcoclaurine	0.932177	136.206	272.124	1.11547	2.25189	0.0946276	0.402468	0.28398	0.495349	-1.01348
	527	Val Pro	0.932124	58.8792	215.139	0.720415	1.15335	0.163796	0.645844	0.353311	0.624629	-0.678928
	528	Asp Ile	0.931921	44.0074	247.129	1.22881	1.33915	1.58152	0.878188	0.422379	0.917602	-0.12406
	529	Erucamide	0.931686	585.324	338.341	1.01214	2.34115	0.685301	0.473029	0.301617	0.432326	-1.20981
	530	C16 Sphinganine	0.930962	324.022	274.274	0.368425	1.31706	1.70913	0.192219	0.280682	0.279732	-1.83788
	531	tetranor-12-HETE	0.930609	455.358	249.185	1.62169	2.36454	0.435005	0.49491	0.307871	0.685837	-0.544063
	532	Dihydrostemonal	0.930594	288.329	375.107	0.590198	0.770949	0.526161	0.76542	0.389327	0.765548	-0.385436
	533	Feruloylputrescine	0.930224	181.891	265.154	0.700946	10.6835	0.790887	0.330958	0.280814	0.0656099	-3.92994
	534	Histidinyl-Isoleucine	0.930047	60.3431	269.16	0.825604	1.44172	2.50708	0.583621	0.334278	0.572651	-0.804271
	535	PC(18:1(9Z)/0:0)[U]	0.928328	402.463	522.356	1.17966	2.25203	0.0557327	0.293741	0.28079	0.523821	-0.932855
	536	Asp Lys Gln	0.92803	321.171	390.199	0.120045	0.137187	0.293491	0.914356	0.432256	0.87505	-0.192562
	537	Trp Val	0.927165	198.2	304.165	1.01013	1.14865	2.07363	0.842361	0.412252	0.879409	-0.185395
	538	Linoleoyl Ethanolamide	0.927078	352.053	324.289	0.399116	0.828717	0.282128	0.543407	0.322394	0.481607	-1.05407
	539	Asn Ala Arg Lys	0.926347	309.068	488.297	0.0721941	0.223957	0.699682	0.147263	0.280586	0.322358	-1.63327
	540	Met Trp Lys Glu	0.926255	520.274	593.274	0.686019	6.88342	1.89502	0.275781	0.280777	0.0996625	-3.3268
	541	LysoPE(16:1(9Z)/0:0)	0.926148	387.749	452.276	1.06946	2.53106	1.49018	0.233193	0.280737	0.422535	-1.24286
	542	Gln Val Val	0.925724	164.135	345.213	1.19117	2.42146	2.40477	0.52908	0.318058	0.491924	-1.02349
	543	Ornidazole	0.923877	225.199	220.048	0.0535512	0.10497	0.201685	0.425611	0.289402	0.510156	-0.97099
	544	hexadecanedioic acid mono-L-carnitine ester	0.923149	317.615	430.316	0.671959	0.769341	0.0853125	0.849545	0.414311	0.873421	-0.195251
	545	PE(14:0/0:0)	0.923114	373.252	426.261	1.26571	2.32193	1.05224	0.219647	0.280721	0.545112	-0.875376
	546	Hydroxymelphalan	0.923017	243.419	287.104	1.16151	7.87283	0.183111	0.341756	0.280819	0.147534	-2.76088
	547	2,6 dimethylheptanoyl carnitine	0.921398	278.286	302.232	0.241009	0.498665	0.49201	0.338987	0.280818	0.483307	-1.04899
	548	Enterolactone	0.921376	240.422	299.127	2.37123	2.41028	0.441249	0.969073	0.446571	0.983796	-0.0235687
	549	KHIVORIN	0.921272	581.161	587.285	0.137567	0.375508	0.886741	0.0972095	0.280376	0.36635	-1.4487
	550	[6]-Gingerdiol 3,5-diacetate	0.92089	422.423	398.253	0.0423412	0.206769	1.12124	0.228009	0.280731	0.204775	-2.28789
	551	N-docosanoyl taurine	0.920227	254.096	448.341	1.27678	3.41228	1.95	0.119823	0.280493	0.374173	-1.41822
	552	Cimetidine	0.919639	198.445	253.126	2.12211	3.23947	0.85189	0.308149	0.2808	0.655081	-0.610255
	553	Met Arg His	0.919287	286.991	443.218	0.0405501	4.18149	1.73882	0.324533	0.28081	0.00969753	-6.68817
	554	Jasmonic acid	0.917635	245.398	211.133	1.33757	2.24788	1.27098	0.232984	0.280737	0.595038	-0.748947
	555	Asp Gly Val	0.917319	172.791	290.124	1.06936	67.5545	0.0562924	0.329807	0.280813	0.0158296	-5.98123
	556	Indolelactic acid	0.91516	235.23	206.081	0.175143	0.303119	0.525652	0.299553	0.280794	0.577804	-0.791349
	557	Asp Ile Ala	0.914559	167.974	318.165	1.06068	1.11221	1.75563	0.912692	0.431809	0.953673	-0.0684337
	558	Nicotinamide	0.914326	163.571	123.1	0.297819	0.914275	1.10344	0.296789	0.280793	0.325743	-1.61819
	559	Ser Leu	0.913908	93.2675	219.134	1.25683	1.52725	2.56415	0.804254	0.401082	0.822936	-0.281149
	560	Potassium bis(2-hydroxyethyl)dithiocarbamate	0.91305	25.3826	219.984	1.43214	1.77568	0.0022566	0.464307	0.2994	0.806533	-0.310194
	561	6-Paradol	0.912981	422.442	261.185	0.522727	0.987422	0.327653	0.324393	0.28081	0.529385	-0.917611
	562	PC(16:0/0:0)[U]	0.912272	428.05	496.347	1.12182	1.57451	0.200638	0.473004	0.301611	0.712492	-0.489054
	563	2-Benzimidazolylguanidine	0.911352	35.4574	176.092	0.385022	0.718874	0.455988	0.319127	0.280807	0.535591	-0.900796
	564	3beta-Fluoro-5beta-pregnan-20-one	0.910269	399.199	321.257	1.1883	1.45321	0.864242	0.377673	0.280975	0.817704	-0.29035
	565	Glycidyl oleate	0.910237	507.289	339.289	1.731	3.12877	0.355683	0.509318	0.312197	0.553254	-0.853987
	566	4-Pyrimidine Methanamine	0.909325	584.155	110.072	1.29266	3.37053	0.526273	0.340831	0.280819	0.383517	-1.38264
	567	Met Arg Asn	0.909022	290.533	420.197	0.694417	0.913266	1.19939	0.464378	0.299418	0.760367	-0.395233
	568	Lys Thr Ile Trp	0.908745	284.693	547.327	1.1545	1.32732	0.993803	0.814145	0.404022	0.869796	-0.201251
	569	Metaflumizone	0.908697	182.788	507.121	8.47049e-05	0.00119232	1.64557	0.0315144	0.279091	0.0710424	-3.81518
	570	Trihexyphenidyl N-oxide	0.908164	420.848	318.24	0.963239	2.34506	1.1265	0.246641	0.280751	0.410752	-1.28366
	571	Lys Thr Lys	0.90792	369.724	376.259	0.602747	1.4068	0.577286	0.339967	0.280818	0.428452	-1.22279
	572	9-hydroxy-7E-Nonene-3,5-diynoic acid	0.906815	67.3577	165.055	0.87549	1.51998	1.41074	0.474236	0.30192	0.575988	-0.79589
	573	Gly Asp Gly Pro	0.906302	168.369	345.144	1.41959	2.62774	1.91817	0.550827	0.324596	0.540232	-0.88835
	574	L-alpha-Amino-1H-pyrrole-1-hexanoic acid	0.906069	183.103	197.128	1.42803	1.43026	0.166596	0.996142	0.45339	0.998439	-0.00225342
	575	beta-Sitostenone	0.905943	407.164	413.364	1.91214	2.43141	0.267	0.626171	0.34731	0.786433	-0.346604
	576	N-palmitoyl glutamic acid	0.904674	331.85	386.289	0.168182	0.248426	0.430109	0.498693	0.30902	0.67699	-0.562794
	577	Tyrosine	0.90455	92.4562	182.081	0.764739	1.28975	1.43025	0.490365	0.30648	0.592936	-0.754051
	578	Thr Ser Leu	0.904432	153.529	320.181	1.10509	2.08288	2.00169	0.5106	0.312576	0.530556	-0.914424
	579	Chol-11-Enic Acid	0.903638	343.63	373.273	0.247928	0.5859	0.714	0.0787842	0.280231	0.423158	-1.24073
	580	Asp Pro	0.90317	35.8021	231.097	1.48902	1.74241	0.86591	0.775228	0.392285	0.854575	-0.22672
	581	Gln Leu Leu	0.902977	203.662	373.244	1.25198	1.78068	2.23978	0.666982	0.359671	0.703091	-0.508216
	582	6'-Hydroxy-2,3,4,5,2'-pentamethoxy-3',4'-methylenedioxychalcone	0.902731	368.389	419.133	0.177728	0.288992	0.382084	0.412357	0.286346	0.614993	-0.701357
	583	Cassaidine	0.902533	401.308	408.31	1.30734	1.44799	0.430599	0.749159	0.384439	0.90287	-0.14741
	584	3-methyl sulfolene	0.901266	56.2151	133.032	0.726251	0.727544	2.31047	0.997618	0.453757	0.998224	-0.0025651
	585	Decanoyl-L-carnitine	0.901174	308.242	316.248	0.0212795	0.185486	0.424676	0.0199867	0.278004	0.114723	-3.12377
	586	(20R,24R)-20-fluoro-1alpha,24-dihydroxy-26,27-cyclovitamin D3	0.900941	310.422	433.314	0.299016	0.339639	0.437146	0.582102	0.333831	0.880394	-0.183779
	587	Asn Asn His	0.900848	202.841	384.164	3.05322	3.94269	1.23635	0.571338	0.330626	0.774399	-0.36885
	588	4-[5]-ladderane-butanoic acid	0.899813	399.161	247.169	1.31132	1.501	1.14217	0.534925	0.319841	0.873631	-0.194904
	589	Leu Lys Glu Asp	0.898137	309.012	504.272	0.0966595	0.228616	0.308757	0.21373	0.280714	0.422803	-1.24194
	590	His Pro His Ser	0.897845	237.432	477.213	0.0695954	0.337689	0.16011	0.395051	0.282742	0.206093	-2.27863
	591	5,6-DiHETrE-EA	0.897011	343.511	382.294	0.0961096	0.536871	0.842737	0.0119042	0.276009	0.179018	-2.48182
	592	Palmitoyl N-Isopropylamide	0.896349	412.787	298.31	0.923845	2.21993	1.25035	0.047925	0.279741	0.416159	-1.26479
	593	Lumiracoxib	0.896149	102.498	294.067	0.397394	0.410042	1.21942	0.924857	0.43506	0.969153	-0.0452034
	594	Val Val Ala	0.895147	169.451	288.191	1.42007	3.6438	1.58586	0.43924	0.292739	0.389722	-1.35948
	595	Rutacultin	0.894962	327.864	275.127	0.0020642	0.00410696	0.359169	0.166536	0.280634	0.50261	-0.992487
	596	Verazine	0.894009	300.166	398.341	1.08734	3.79357	1.3468	0.0607601	0.280005	0.286626	-1.80276
	597	Tumonoic Acid F	0.893962	316.586	384.274	0.064801	0.169465	0.470773	0.26002	0.280764	0.382387	-1.3869
	598	4-Amino-5-hydroxymethyl-2-methylpyrimidine	0.893199	494.224	140.082	1.32851	4.25931	0.161975	0.307235	0.2808	0.311908	-1.68081
	599	Pro Ile	0.892685	99.8833	229.154	0.409677	1.05124	0.253772	0.185383	0.28067	0.38971	-1.35953
	600	Procaterol	0.892653	196.582	291.163	0.938117	5.15813	0.149556	0.246351	0.280751	0.181872	-2.45901
	601	Taurocholate	0.892424	289.094	516.298	0.0301378	0.0607438	0.202829	0.247314	0.280752	0.496146	-1.01116
	602	11beta-PGF2alpha	0.892336	292.909	377.23	1.23073	2.44269	1.58116	0.0776672	0.28022	0.503844	-0.988952
	603	Linamarin	0.891839	187.789	248.111	1.83048	2.0695	0.817941	0.735229	0.380411	0.884504	-0.17706
	604	Metipranolol	0.891167	261.617	310.201	0.184453	0.686152	2.08415	0.100465	0.280396	0.268823	-1.89527
	605	Ile Lys	0.890462	89.171	260.196	1.08011	2.4243	2.04696	0.493973	0.307586	0.445535	-1.16639
	606	Ricinoleic Acid methyl ester	0.888517	507.19	313.273	1.31066	60.9951	2.0623	0.312147	0.280803	0.0214879	-5.54033
	607	Leu Thr Pro Ile	0.888148	393.357	443.285	1.11399	1.97216	0.919135	0.275562	0.280777	0.564856	-0.824046
	608	2-Methyl-1-Pyrroline	0.887959	36.2557	84.0813	1.48125	2.22688	0.628272	0.381776	0.281265	0.665169	-0.588207
	609	METHYLPREDNISOLONE	0.887827	179.374	375.223	1.66348	2.64208	1.69707	0.489877	0.30633	0.629611	-0.667467
	610	Xanthan	0.887308	378.077	183.08	1.24876	3.34839	0.732152	0.330427	0.280813	0.372943	-1.42297
	611	Stercobilin	0.887092	309.192	595.348	0.911234	2.06305	1.25549	0.1311	0.280536	0.441693	-1.17889
	612	Serine	0.886978	30.2982	106.05	0.850105	0.860628	1.57337	0.978466	0.448957	0.987772	-0.0177495
	613	Elaidic Acid	0.88685	530.195	283.263	1.73458	2.47467	0.0511842	0.597164	0.338363	0.700935	-0.512647
	614	Nuatigenin	0.885563	423.462	431.311	1.12122	1.1361	0.0234368	0.983024	0.450107	0.986899	-0.0190252
	615	Leu Trp His Arg	0.885423	248.238	611.343	0.565733	1.36553	1.15939	0.0716659	0.280155	0.414295	-1.27127
	616	Ile Pro	0.885259	133.773	229.154	0.313056	1.00097	0.279963	0.148955	0.280591	0.312752	-1.67691
	617	Falcarindiol	0.884868	399.166	261.185	1.39616	1.55322	1.02823	0.633696	0.349588	0.898884	-0.153793
	618	2'-Aminoacetophenone	0.883958	67.5616	136.076	0.874529	1.47111	1.44715	0.486398	0.305255	0.594468	-0.750328
	619	(1(10)E,4E,6a,9b)-9-(2-Methylpropanoyloxy)-1(10),4,11(13)-germacratrien-12,6-olide	0.883585	343.918	319.19	0.869153	2.04176	0.0327996	0.259868	0.280764	0.425688	-1.23213
	620	EUGENITOL	0.883523	327.999	207.065	0.00378846	0.00631268	0.447893	0.459406	0.298132	0.600136	-0.736639
	621	NILOTICIN	0.882672	409.361	457.367	1.24522	2.50791	0.274003	0.315196	0.280804	0.496516	-1.01009
	622	Lys Arg Leu Gly	0.882656	407.202	473.323	1.40928	1.58335	0.489013	0.657058	0.356692	0.890067	-0.168014
	623	Leu Glu Ala	0.881851	158.42	332.181	1.22027	1.31316	2.81039	0.91612	0.432729	0.929266	-0.105837
	624	Hecogenin	0.881707	423.62	453.293	1.09019	1.15557	0.199491	0.929996	0.436423	0.943416	-0.0840343
	625	Leu Thr Asn	0.880345	161.686	347.192	1.26008	3.45302	1.98896	0.458314	0.297847	0.36492	-1.45435
	626	PE(17:1(9Z)/0:0)	0.880278	405.357	466.292	0.98999	1.03067	0.527475	0.911668	0.431533	0.960528	-0.0580998
	627	Dimorphecolic acid	0.879915	315.708	297.242	1.52993	1.63862	0.65732	0.838891	0.411252	0.933669	-0.0990172
	628	2-(5,8-Tetradecadienyl)cyclobutanone	0.879874	398.892	263.237	1.56567	1.87199	0.201183	0.697135	0.369046	0.836368	-0.25779
	629	N,N-Dimethyldodecylamine N-oxide	0.879763	326.223	230.248	0.386628	1.06197	1.13968	0.222777	0.280725	0.364068	-1.45772
	630	Ala-Leu	0.877538	157.068	203.139	1.38883	3.27011	1.82999	0.467672	0.300261	0.424703	-1.23547
	631	[6]-Dehydrogingerdione	0.87623	428.727	291.159	0.218229	0.971031	1.27142	0.139425	0.280563	0.224739	-2.15368
	632	Isoprenyl alcohol	0.875988	175.685	87.081	1.41418	2.89232	0.701824	0.285363	0.280784	0.488942	-1.03226
	633	7,2'-Dimethoxy-4',5'-methylenedioxyflavanone	0.875467	306.95	329.112	0.284123	0.408314	0.280477	0.305889	0.280799	0.695843	-0.523167
	634	Agecorynin A	0.875316	317.073	389.122	0.147897	2.14677	0.308185	0.331719	0.280814	0.0688927	-3.85951
	635	Ser Val	0.875081	64.7394	205.118	1.30933	1.67022	2.2262	0.752471	0.385432	0.783925	-0.351212
	636	Met Trp Thr Lys	0.873418	487.783	565.28	1.88008	13.2492	0.353221	0.332608	0.280814	0.141902	-2.81704
	637	Ser Tyr	0.872652	136.551	269.107	1.21778	2.41322	0.270672	0.39393	0.282573	0.504628	-0.986708
	638	Glu Val Val	0.870441	167.582	346.197	1.70161	5.70257	2.0306	0.434879	0.291564	0.298394	-1.74471
	639	Lys Asp Trp Phe	0.870091	520.25	595.281	0.673824	8.24551	1.03526	0.289456	0.280787	0.08172	-3.61317
	640	I-Methyl-4-nitro-5-thio-imidazole	0.86886	146.302	160.017	0.0141654	0.0381824	0.728302	0.396543	0.282964	0.370992	-1.43054
	641	R-Palmitoyl-(2-methyl) Ethanolamide	0.867491	398.505	314.305	1.17566	1.69279	0.454391	0.436028	0.291861	0.694509	-0.525935
	642	19(R)-hydroxy PGF2alpha	0.865756	287.185	393.226	0.0361399	0.0501884	0.840012	0.384401	0.281468	0.720086	-0.473759
	643	Gln Phe	0.864098	170.719	294.144	1.11224	2.18875	1.72404	0.506654	0.311407	0.508164	-0.976634
	644	Estriol	0.86399	306.655	271.169	0.652859	0.802166	0.40692	0.823969	0.406913	0.81387	-0.297129
	645	N-Acetylneuraminate	0.863174	33.8886	310.113	0.947262	1.02382	0.00271748	0.82902	0.408389	0.925225	-0.112124
	646	N-oleoyl methionine	0.861779	310.155	414.299	0.111467	0.144158	0.689525	0.535007	0.319866	0.773228	-0.371034
	647	N,N-dimethyl-Safingol	0.86144	390.508	330.336	1.00816	1.96654	0.193588	0.36907	0.280832	0.512653	-0.963945
	648	3,3'-methylenebis(6-ethyl-4-hydroxy-5-methyl-2H-pyran-2-one)	0.860278	328.014	321.133	0.00314917	0.00601769	0.57218	0.414987	0.286963	0.523319	-0.934237
	649	17-phenyl trinor PGF2alpha cyclohexyl amide	0.860248	436.353	470.313	1.04613	1.80071	0.705787	0.0838297	0.280277	0.580952	-0.78351
	650	5a-Dihydrotestosterone sulfate	0.859604	202.683	371.185	0.0723548	0.0744254	1.28648	0.917417	0.433076	0.972179	-0.0407061
	651	(20S,22E)-3beta-Hydroxy-5alpha-chol-22-en-24-oic Acid	0.859149	343.993	375.289	0.362562	0.594905	0.0736721	0.2208	0.280723	0.609446	-0.71443
	652	Gly Trp Ser Cys	0.858006	175.695	452.159	0.594196	0.889282	0.126071	0.413894	0.286707	0.668175	-0.581702
	653	2-(2-Furanyl)pyrrolidine	0.857711	104.258	138.091	0.206185	0.494445	0.362117	0.249058	0.280754	0.417004	-1.26187
	654	7-Hydroxyenterolactone	0.85651	264.634	315.122	1.42853	2.68883	0.851223	0.17801	0.280657	0.531284	-0.912444
	655	7-METHOXYCHROMONE	0.856109	230.768	177.055	0.641461	1.08903	0.57828	0.296285	0.280792	0.589019	-0.763614
	656	9R,10S-Epoxy-3Z,6Z-eicosadiene	0.855958	538.8	293.283	1.13589	2.03082	0.0080578	0.414184	0.286775	0.559325	-0.838241
	657	17-phenoxy trinor Prostaglandin F2alpha isopropyl ester	0.855829	267.851	429.263	1.76907	3.73209	0.276642	0.605551	0.340973	0.474015	-1.07699
	658	MG(0:0/18:3(9Z,12Z,15Z)/0:0)	0.855662	401.062	353.268	3.46278	9.49834	0.700124	0.414643	0.286883	0.364567	-1.45574
	659	Usambarensine	0.855449	217.761	433.236	0.0830975	0.156491	0.820445	0.511347	0.312796	0.531006	-0.913199
	660	Vaccenic acid	0.855404	436.3	283.254	1.21346	2.26591	0.0465615	0.338559	0.280818	0.535527	-0.900968
	661	Asn Gln Lys Phe	0.855186	512.183	536.277	1.88687	4.05655	0.396627	0.494805	0.307839	0.46514	-1.10426
	662	5,8,11,14-octadecatetraenoic acid	0.854577	455.365	277.216	1.57078	2.20026	0.524642	0.46925	0.300662	0.713906	-0.486195
	663	9,10-epoxy-13-oxo-11-octadecenoic acid	0.854184	293.563	311.221	1.35671	3.29003	0.877398	0.269561	0.280772	0.412372	-1.27798
	664	Gerrardine	0.853763	173.155	326.037	0.9259	1.20817	0.827882	0.679498	0.363604	0.766364	-0.383898
	665	LysoPE(0:0/18:4(6Z,9Z,12Z,15Z))	0.853675	187.99	474.256	0.273909	0.966289	1.29072	0.298128	0.280794	0.283465	-1.81876
	666	5-(1-oxopropan-2-yl)isolongifol-5-ene	0.853575	458.717	261.221	2.34672	3.28613	0.235475	0.726522	0.377859	0.71413	-0.485741
	667	Oryzalide A	0.853516	422.474	321.205	0.148734	0.848396	2.49122	0.133137	0.280543	0.175312	-2.512
	668	His Trp Asn	0.852369	343.915	456.198	0.0738118	0.0912703	0.144635	0.790375	0.396908	0.808717	-0.306294
	669	beta-Santalyl acetate	0.849854	455.274	263.2	1.65103	2.40606	0.545502	0.514464	0.313712	0.686194	-0.543312
	670	Phenylalanyl-Arginine	0.848745	145.782	322.176	1.71743	2.50768	0.517321	0.521695	0.315814	0.684866	-0.546106
	671	Glu Ser Ser Cys	0.84798	348.95	425.135	1.606	6.26994	1.37724	0.29267	0.28079	0.256143	-1.96498
	672	C-13-Carboxypyropheophorbide a	0.846703	483.156	579.259	0.785906	23.5235	0.386386	0.30756	0.2808	0.0334094	-4.9036
	673	R-4-benzyl-3-isobutyryl-5,5-dimethyloxazolidin-2-one	0.846541	286.409	276.159	0.634897	4.98686	0.12196	0.205349	0.280702	0.127314	-2.97354
	674	27-Norcholestanehexol	0.845156	469.837	455.333	1.32423	2.37324	0.138815	0.357103	0.280827	0.557985	-0.841701
	675	Lys His Met	0.842884	376.7	415.211	0.902615	2.53193	0.555569	0.327436	0.280812	0.356493	-1.48805
	676	Glu Arg Cys Lys	0.842381	541.213	535.269	1.01162	9.79264	1.61952	0.320279	0.280808	0.103304	-3.27504
	677	4-Hydroxypenbutolol	0.841484	313.407	308.221	1.27199	3.11402	0.588073	0.343759	0.28082	0.408472	-1.29169
	678	(22E)-3alpha,6beta,7beta-Trihydroxy-5beta-chol-22-en-24-oic Acid	0.841012	288.156	407.278	0.561672	1.51747	0.164162	0.0964921	0.280371	0.370138	-1.43387
	679	O-propanoyl-carnitine	0.83926	172.635	218.139	1.53575	2.29471	0.369966	0.36481	0.280831	0.669256	-0.579371
	680	6,10-dimethyl-9-methylene-undec-5E-en-2-one	0.836425	439.543	209.19	1.24807	5.3572	0.714619	0.329842	0.280813	0.232971	-2.10178
	681	MG(18:3(9Z,12Z,15Z)/0:0/0:0)	0.835308	375.645	353.268	1.59715	3.44537	0.418488	0.33344	0.280815	0.463564	-1.10916
	682	Lys-Gln-Ala-Gly-Asp-Val	0.834843	259.782	617.33	1.03719	2.62719	1.19517	0.10069	0.280397	0.394792	-1.34084
	683	2-Angeloyl-9-(3-methyl-2E-pentenoyl)-2b,9a-dihydroxy-4Z,10(14)-oplopadien-3-one	0.834615	288.202	429.26	1.20313	2.28653	0.425845	0.246822	0.280751	0.526182	-0.926367
	684	6-Caprolactam	0.834584	179.926	114.092	4.37137	25.19	0.13862	0.338482	0.280818	0.173536	-2.52669
	685	Zinnimidine	0.831933	438.765	262.143	1.23056	3.27671	0.80726	0.326586	0.280811	0.375548	-1.41293
	686	Levan	0.831883	34.8767	527.157	0.353343	2.68175	1.59941	0.0231676	0.278411	0.131759	-2.92403
	687	3alpha,12alpha-Dihydroxy-5beta-pregnan-20-one diacetate	0.831807	468.523	419.278	1.35823	1.50447	0.712628	0.71818	0.375389	0.902795	-0.14753
	688	Indole-3-acetyl-L-valine	0.830234	198.466	275.139	1.25596	1.64233	0.635574	0.45956	0.298172	0.764744	-0.386952
	689	Hesperetin	0.829843	302.304	303.086	0.185044	0.627686	0.776351	0.316049	0.280805	0.294803	-1.76218
	690	Glutamate	0.829651	31.7137	148.06	1.01356	1.25479	0.4023	0.636489	0.35045	0.807758	-0.308005
	691	Cys Arg Gly Asn	0.829123	241.078	449.191	0.634405	2.07435	0.377042	0.111078	0.280453	0.305833	-1.70918
	692	2,6-Diisopropylhydroquinone	0.828339	435.514	195.138	1.76919	3.80066	0.650713	0.335869	0.280816	0.465494	-1.10316
	693	13-Tetradecene-1,3-diyne-6,7-diol	0.827036	399.158	221.153	1.12926	1.27937	1.04503	0.57178	0.330759	0.882669	-0.180056
	694	8(9)-EET methyl ester	0.825577	444.159	335.257	2.19154	5.21675	0.548133	0.515977	0.314154	0.420097	-1.25121
	695	Tyrosyl-Leucine	0.825548	180.048	295.165	1.62717	38.7316	0.430458	0.323222	0.280809	0.0420116	-4.57307
	696	Leu Tyr Phe Phe	0.82501	294.292	589.301	0.943477	1.4061	0.54842	0.4587	0.297948	0.670987	-0.575644
	697	Malabaricano	0.823797	379.894	345.169	0.120555	1.424	0.161037	0.354604	0.280826	0.0846591	-3.56219
	698	Smenospongiarine	0.823465	346.675	414.299	0.220016	0.554071	1.10936	0.12992	0.280532	0.39709	-1.33246
	699	Hydroxypentobarbital	0.823223	155.272	243.134	1.13823	1.14006	2.51157	0.998118	0.453881	0.9984	-0.00231027
	700	Chavicol	0.822644	376.698	135.08	0.974143	2.55507	0.800637	0.320772	0.280808	0.381259	-1.39116
	701	Isoleucyl-Alanine	0.821763	135.292	203.139	1.25821	2.23426	1.52027	0.523753	0.316417	0.563142	-0.82843
	702	9-keto palmitic acid	0.81999	429.502	271.226	1.34482	2.57544	0.0388971	0.344698	0.280821	0.522171	-0.937407
	703	beta-Citraurinene	0.819715	403.45	419.33	0.241325	1.10015	1.41827	0.118316	0.280486	0.219357	-2.18865
	704	Citreovirenone	0.819619	224.735	249.112	0.959128	2.39462	1.21555	0.0579809	0.279958	0.400534	-1.32
	705	1-Pyrrolidinecarboxaldehyde	0.81945	35.8914	100.076	0.68056	1.31339	0.131457	0.137708	0.280558	0.51817	-0.948503
	706	N1-Acetylspermidine	0.819149	29.3097	188.176	1.14064	5.88606	0.434787	0.315828	0.280805	0.193786	-2.36746
	707	2',3',6-Trimethoxyflavone	0.818047	247.619	313.106	1.47457	1.6849	0.641226	0.72719	0.378055	0.875166	-0.192371
	708	Alanyl-Isoleucine	0.816477	36.4358	203.139	1.58561	1.72618	0.315077	0.794993	0.398303	0.91857	-0.122539
	709	LPA(0:0/18:0)	0.816105	406.361	439.277	0.909469	1.72468	0.513339	0.329513	0.280813	0.527326	-0.923233
	710	Asn Val	0.815258	35.9097	232.118	2.26444	2.41767	0.71911	0.905	0.429734	0.93662	-0.0944638
	711	2-Dimethylamino-5,6-dimethylpyrimidin-4-ol	0.815006	61.4242	168.113	1.24536	6.44349	0.299242	0.29406	0.280791	0.193274	-2.37128
	712	N-cis-tetradec-9Z-enoyl-L-Homoserine lactone	0.815003	319.548	310.237	1.18988	3.14847	0.650857	0.334017	0.280815	0.377923	-1.40384
	713	RIBOFLAVIN	0.814843	230.075	377.145	0.337582	0.40769	0.325079	0.576664	0.332219	0.828036	-0.272235
	714	DG(18:2(9Z,12Z)/18:4(6Z,9Z,12Z,15Z)/0:0)	0.814729	595.639	613.481	0.412209	2.78273	0.77277	0.312904	0.280803	0.148131	-2.75505
	715	4-Deoxytetronic acid	0.814421	140.232	87.0446	1.28913	2.47619	0.904607	0.339481	0.280818	0.52061	-0.941724
	716	Oxycodone	0.813935	143.337	316.15	2.18476	3.99996	0.487778	0.49156	0.306847	0.546197	-0.872507
	717	PE(18:3(6Z,9Z,12Z)/0:0)	0.813109	378.826	476.276	0.37371	1.6373	0.935512	0.28044	0.280781	0.228247	-2.13133
	718	Ceftriaxone	0.813025	194.393	555.052	0.0100707	0.0442655	1.11916	0.208171	0.280706	0.227508	-2.13601
	719	trans-Ferulic Acid	0.812588	230.867	195.065	0.571065	1.12626	0.108631	0.206668	0.280704	0.507045	-0.979815
	720	4-Pyridoxolactone	0.810411	253.502	166.05	1.16883	2.44391	0.637553	0.330819	0.280814	0.478262	-1.06413
	721	Linoleoyl glycine	0.810115	506.028	338.268	1.04077	2.12016	0.211487	0.418938	0.28788	0.490892	-1.02652
	722	PC(O-8:0/O-8:0)	0.810024	431.517	482.36	0.6261	0.841883	0.399965	0.38524	0.281532	0.74369	-0.427228
	723	Prilocaine	0.809597	189.344	221.165	0.679463	0.964041	0.221426	0.575122	0.331759	0.704807	-0.5047
	724	Methohexital	0.808155	185.363	263.139	0.714636	2.28147	0.700473	0.378782	0.28103	0.313235	-1.67468
	725	Malyngamide H	0.807878	310.438	432.31	0.144602	0.220193	0.939524	0.356522	0.280827	0.656703	-0.606686
	726	delta-Tridecalactone	0.807226	459.682	213.185	1.09878	1.87802	0.207142	0.305811	0.280799	0.585072	-0.773314
	727	Asp Val Ile	0.804681	193.345	346.197	1.03028	1.36098	2.57521	0.729455	0.378721	0.757015	-0.401607
	728	Asn Met Lys Phe	0.804328	473.752	539.264	0.261981	0.891675	0.257389	0.0464838	0.279702	0.293808	-1.76706
	729	9,10-epoxy-11-hydroxy-12-octadecenoic acid	0.803467	331.868	313.237	1.2758	2.25906	0.272492	0.11801	0.280485	0.564746	-0.824325
	730	Acetyl-DL-Valine	0.802341	34.0759	160.097	0.965856	1.02815	0.258114	0.910859	0.431315	0.939409	-0.090174
	731	Tazobactam	0.802162	2.77583	301.058	1.15056	2.72189	0.94401	0.235099	0.280739	0.422705	-1.24228
	732	PC(O-18:1(11Z)/0:0)	0.800797	443.31	508.375	0.710182	0.864564	0.579489	0.570203	0.330285	0.821433	-0.283785
	733	Oleoyl Ethyl Amide	0.800413	538.81	310.31	1.17529	1.97875	0.00074478	0.467303	0.300167	0.593955	-0.751574
	734	Robustine	0.797587	268.457	216.055	1.51337	2.66473	0.311451	0.525118	0.316839	0.567927	-0.816222
	735	Phthalic anhydride	0.79669	450.065	149.023	1.18661	3.00037	0.7115	0.334358	0.280815	0.39549	-1.33829
	736	1,4-Dideoxy-1,4-Imino-D-Arabinitol	0.79629	32.254	134.081	1.27175	1.64658	0.151635	0.663591	0.358639	0.772357	-0.37266
	737	Gln Val	0.795089	68.9317	246.145	1.18272	1.7608	2.41834	0.67217	0.361309	0.671694	-0.574124
	738	5beta-CHOLANIC ACID-3alpha, 12alpha-DIOL N-(2-SULPHOETHYL)-AMIDE	0.794455	328.882	500.303	0.194052	0.26101	0.141597	0.573131	0.331164	0.743468	-0.427657
	739	Gln Tyr	0.794013	151.297	310.128	0.941099	2.43443	0.869816	0.413931	0.286716	0.386579	-1.37116
	740	Metaproterenol 3-O-sulfate	0.793	36.3309	292.084	1.64917	1.68551	0.791597	0.957818	0.443686	0.978441	-0.0314428
	741	deschlorobenzoyl Indomethacin	0.792779	229.563	220.097	2.97968	3.96941	0.713435	0.55253	0.325097	0.750661	-0.413766
	742	Lithocholic acid glycine conjugate	0.792722	248.323	434.326	0.0204951	0.0716743	0.597039	0.0828426	0.280268	0.285947	-1.80618
	743	Furcelleran	0.791925	354.123	478.196	0.0903416	0.483864	0.973903	0.125598	0.280516	0.186709	-2.42114
	744	Soyasaponin III	0.791231	330.238	797.466	0.34942	0.536756	0.288651	0.5371	0.3205	0.650985	-0.619303
	745	9-methoxy-2,2-dimethyl-6-hydro-2H-pyrano[5,6-c]quinolin-5-one	0.791227	35.2833	258.108	1.34173	2.28638	0.686377	0.283461	0.280783	0.586837	-0.768968
	746	MG(0:0/18:3(6Z,9Z,12Z)/0:0)	0.787797	444.12	353.268	1.1246	5.12071	0.125338	0.384445	0.281471	0.219618	-2.18693
	747	Linoleic acid	0.7869	436.615	281.247	0.768262	1.19342	0.679175	0.527235	0.317492	0.643751	-0.635426
	748	2,6-Piperidinedicarboxylic acid	0.786479	62.0132	174.076	1.89843	2.57641	0.448203	0.586292	0.335062	0.736851	-0.440555
	749	(E)-4-stilbenol	0.785335	401.144	197.096	1.26526	3.22202	0.633698	0.334499	0.280816	0.392692	-1.34853
	750	Glutamylphenylalanine	0.785086	177.155	295.128	1.46044	1.9593	2.26493	0.673614	0.361763	0.74539	-0.423934
	751	1,5-Octadien-3-one	0.784572	3.04335	125.096	0.960368	4.26848	1.8508	0.301302	0.280796	0.22499	-2.15206
	752	(-)-trans-3,4-Dihydro-4,8-dihydroxy-3-methyl-1H-2-benzopyran-1-one	0.784366	274.275	195.065	0.697797	1.50555	1.23521	0.228583	0.280732	0.463482	-1.10941
	753	His Ser Val Glu	0.783713	29.6857	471.218	0.307981	0.393781	0.475157	0.529845	0.318293	0.782112	-0.354553
	754	5'-S-Methyl-5'-thioinosine	0.783157	143.881	299.08	2.13728	4.51287	0.0374079	0.384233	0.281455	0.473596	-1.07827
	755	Agestricin B	0.783154	234.894	345.096	1.32336	1.46442	0.162372	0.905007	0.429735	0.903673	-0.146128
	756	Styrene oxide	0.783018	349.02	121.065	1.0403	2.97423	0.835532	0.308683	0.2808	0.349773	-1.51551
	757	Calcipotriol	0.782981	379.303	395.294	1.47429	1.50893	0.00279061	0.933488	0.437345	0.97704	-0.0335102
	758	Myristoleic acid	0.782614	459.689	227.2	1.14074	1.93553	0.0634866	0.328155	0.280812	0.589366	-0.762764
	759	Gln Leu Ala	0.782388	157.042	331.197	1.30364	1.93453	1.95517	0.645194	0.353114	0.673883	-0.56943
	760	4-Methoxy-5-(3,7,11,15-tetramethyl-2,6,10,14-hexadecatetraenyl)-1,3-benzenediol	0.780634	379.912	413.304	1.41766	1.88808	0.687068	0.39048	0.282051	0.750849	-0.413406
	761	3alpha,4,5,7alpha-Tetrahydro-5-hydroxy-1H-isoindole-1,3(2H)-dione	0.779218	167.071	168.065	1.18728	6.24067	1.5037	0.104895	0.280421	0.190249	-2.39404
	762	PG(22:4(7Z,10Z,13Z,16Z)/18:4(6Z,9Z,12Z,15Z))	0.779101	373.717	819.508	1.21324	2.2687	0.881968	0.214758	0.280715	0.534775	-0.902997
	763	Val Met	0.778301	159.219	249.127	1.17442	4.22208	1.73823	0.403951	0.28434	0.278161	-1.84601
	764	Asn His Asp Glu	0.777654	253.038	514.191	0.0036073	0.0205938	0.134801	0.347547	0.280822	0.175165	-2.51322
	765	Gly Leu Phe	0.777115	203.367	336.191	1.14546	1.73493	2.13638	0.615932	0.344184	0.66023	-0.59896
	766	9(R)-HODE	0.776868	450.804	279.231	1.19519	2.60282	0.437713	0.244593	0.280749	0.459192	-1.12283
	767	N,2,3-Trimethyl-2-(1-methylethyl)butanamide	0.776533	352.515	172.169	1.45396	2.34044	0.264351	0.523009	0.316192	0.621234	-0.68679
	768	(+)-2,5-epi Goniothalesdiol	0.775079	257.983	267.122	0.720875	1.52113	1.92126	0.1079	0.280437	0.473909	-1.07732
	769	Atenolol acid	0.774922	184.885	268.154	0.0807652	0.0960396	1.02468	0.881851	0.423395	0.840958	-0.249895
	770	Neocembrene	0.774104	413.598	273.257	1.71261	1.95611	0.0956407	0.813644	0.403874	0.875518	-0.191791
	771	Nigakilactone B	0.771535	218.299	393.212	1.236	1.94152	2.28586	0.600238	0.339317	0.636616	-0.651505
	772	Ethyl acrylate	0.769658	36.0046	101.06	0.668416	1.25199	0.139085	0.118378	0.280486	0.533883	-0.905404
	773	N-Acryloylglycine	0.76776	60.8982	130.05	0.318239	0.465037	0.126077	0.372011	0.280872	0.684331	-0.547233
	774	Phenacetin	0.76716	191.155	180.102	0.350588	1.14012	1.55323	0.0673185	0.280101	0.307501	-1.70134
	775	Lys Val Arg Pro	0.766066	417.904	499.347	0.793203	0.852914	0.151163	0.872817	0.420884	0.929993	-0.104709
	776	PE(O-16:0/0:0)	0.765989	426.866	440.313	1.57496	2.75898	1.26967	0.100856	0.280398	0.570848	-0.808822
	777	2-Furanpropanoic acid, tetrahydro-4-(1-naphthalenylmethyl)-5-oxo-	0.764056	302.245	299.127	1.63577	2.58796	0.999261	0.360619	0.280829	0.632069	-0.661846
	778	3alpha-Hydroxy-15-oxo-5beta-chol-8-en-24-oic Acid	0.761334	302.476	389.268	0.931199	1.15053	0.251994	0.717925	0.375313	0.809366	-0.305137
	779	Ursonic acid	0.761254	401.915	455.351	1.75067	1.88653	0.455806	0.877081	0.422072	0.927986	-0.107825
	780	12(R)-HEPE	0.760731	342.124	301.216	0.722985	3.29956	1.3054	0.0139484	0.276729	0.219116	-2.19023
	781	L-threo-3-Phenylserine	0.759074	232.9	182.081	0.874667	1.16793	0.920915	0.325414	0.28081	0.748902	-0.417151
	782	Codeine	0.758166	313.099	300.159	1.87013	1.88346	0.0444423	0.985704	0.45078	0.992926	-0.0102412
	783	PE(18:2(9Z,12Z)/0:0)	0.757653	399.688	478.292	0.484322	1.18681	1.61175	0.096003	0.280368	0.408087	-1.29305
	784	Gln Glu Val	0.756119	150.921	375.176	0.918651	2.15893	1.3309	0.442969	0.293758	0.425513	-1.23273
	785	2,3-Dihydro-5-propanoyl-1H-pyrrolizine	0.755276	248.418	164.107	1.21553	3.52164	1.79105	0.0365407	0.279352	0.34516	-1.53466
	786	MG(18:1(9Z)/0:0/0:0)[rac]	0.755102	507.325	357.299	1.71824	3.05552	0.38648	0.516643	0.314348	0.56234	-0.830486
	787	Leu Trp Trp Glu	0.753986	353.887	633.291	1.63149	1.88125	0.627902	0.752863	0.385549	0.86724	-0.205497
	788	L-Octanoylcarnitine n-butyl ester	0.753065	453.033	344.279	0.906944	1.08033	0.138547	0.707834	0.372291	0.839507	-0.252386
	789	Methyl oleate	0.751214	512.745	297.278	0.717772	18.1133	2.24144	0.279795	0.28078	0.0396267	-4.65738
	790	Xanthophyll	0.74872	576.067	568.426	1.32479	4.49314	0.0750057	0.378527	0.28101	0.294848	-1.76196
	791	12-epi Leukotriene B3	0.748312	362.625	321.242	0.887894	4.71866	2.03107	0.140275	0.280566	0.188166	-2.40992
	792	LysoPC(20:4(5Z,8Z,11Z,14Z))	0.745637	429.771	544.336	1.02048	1.34625	0.306924	0.682847	0.364647	0.758014	-0.399704
	793	Linalyl diphosphate	0.744333	142.802	315.076	1.06312	1.43438	0.687226	0.592247	0.336827	0.741173	-0.432117
	794	Hydroxyprogesterone caproate	0.744132	386.185	429.299	1.47086	1.78172	0.433062	0.642707	0.352356	0.825528	-0.276611
	795	Tyr Val Ile	0.741726	317.461	394.225	2.04522	2.24482	0.314551	0.870144	0.420136	0.911086	-0.134341
	796	Asn Thr Val Asn	0.740608	392.643	447.218	0.332213	0.870005	0.262939	0.031247	0.279075	0.381852	-1.38891
	797	Phytosphingosine	0.737083	326.146	318.3	0.546531	2.93815	2.29546	0.181671	0.280664	0.186012	-2.42653
	798	Methylprednisolone succinate	0.735901	319.254	475.232	0.0498357	0.175282	0.103778	0.310415	0.280802	0.284317	-1.81443
	799	5-Methoxytryptophan	0.735617	224.982	235.107	1.51529	2.96212	0.365357	0.292746	0.28079	0.511556	-0.967036
	800	Leu Thr Ile Asn	0.735419	184.723	460.276	1.76571	7.07084	1.06344	0.418321	0.287737	0.249717	-2.00163
	801	gamma-Undecalactone	0.733855	310.118	185.153	1.64399	5.74159	0.888768	0.301556	0.280796	0.286331	-1.80425
	802	Geranylgeraniol	0.733807	443.582	291.268	0.626449	189.059	2.52531	0.322889	0.280809	0.00331351	-8.23742
	803	Stearidonic Acid ethyl ester	0.733537	501.433	305.247	0.793496	2.40821	2.57161	0.00779016	0.273447	0.329496	-1.60167
	804	4-acetamidobutanoate	0.732926	33.6386	146.081	0.883131	6.22873	0.365906	0.31791	0.280806	0.141783	-2.81824
	805	Leucyl-Tyrosine	0.731435	163.73	295.176	3.72025	22.578	1.77546	0.209987	0.280709	0.164773	-2.60145
	806	PA(22:0/0:0)	0.73067	427.897	495.344	0.421997	0.696167	0.716274	0.520931	0.315593	0.606172	-0.7222
	807	3,6-Dioxo-5beta-cholan-24-oic Acid	0.730021	379.644	389.268	1.01559	3.58565	1.11482	0.0831412	0.280271	0.283236	-1.81992
	808	Ile Glu Leu Val	0.726133	223.142	473.296	1.16156	2.12339	2.28609	0.586697	0.335181	0.54703	-0.870309
	809	Schidigeragenin B	0.725187	362.679	429.299	1.16306	1.99921	1.19153	0.103791	0.280415	0.581759	-0.781506
	810	Losartan	0.724983	312.569	423.169	0.0342114	2.84219	0.733341	0.328631	0.280812	0.012037	-6.37638
	811	Glu Val Thr Lys	0.724014	414.438	476.274	1.19427	2.51356	0.823723	0.309917	0.280801	0.475129	-1.07361
	812	Glu Trp Trp Thr	0.724006	523.21	621.269	0.142651	0.842909	0.436669	0.200371	0.280695	0.169237	-2.56289
	813	24,25-hydroxyvitamin D3	0.723336	405.803	417.336	2.71305	4.16645	0.36836	0.506808	0.311453	0.651166	-0.618902
	814	3-Oxo-4,6-choladienoic acid	0.723321	290.252	371.257	0.903737	1.1502	0.203163	0.484746	0.304778	0.785719	-0.347915
	815	Met Val Arg Lys	0.723059	289.091	533.325	0.0420518	0.0786649	0.137184	0.18052	0.280662	0.534569	-0.903552
	816	Pro Leu Lys	0.721395	34.2313	357.249	0.28173	1.13136	0.115102	0.139348	0.280563	0.24902	-2.00567
	817	Pazufloxacin	0.721159	131.005	319.113	1.27035	1.45804	0.313951	0.676142	0.362555	0.871275	-0.198801
	818	Gly Arg Lys Cys	0.720003	277.762	463.244	0.00555325	0.532963	1.31335	0.322013	0.280809	0.0104196	-6.58456
	819	9-OxoODE	0.716346	400.783	295.226	0.8892	1.995	0.781285	0.18907	0.280677	0.445714	-1.16581
	820	N-Acetyl-D-phenylalanine	0.71311	227.136	208.097	1.51858	2.248	0.121391	0.636539	0.350465	0.675526	-0.565917
	821	8-Amino Caprylic acid	0.712411	44.2285	160.133	1.28168	3.66002	0.435491	0.325663	0.280811	0.350184	-1.51382
	822	delta-CEHC	0.709937	355.969	251.127	1.17682	2.42595	1.64178	0.234756	0.280739	0.485097	-1.04365
	823	Dolichyl b-D-glucosyl phosphate	0.706113	458.288	467.24	0.306905	0.742728	0.888872	0.199815	0.280694	0.413213	-1.27504
	824	Trp Leu	0.705649	216.976	318.181	1.04932	1.84758	2.37189	0.581255	0.33358	0.567946	-0.816173
	825	N2-Acetyl-L-aminoadipate	0.704539	34.1446	204.087	1.33051	1.62191	0.252383	0.671987	0.361251	0.820332	-0.28572
	826	delta2-cis Eicosenoic Acid	0.704315	453.576	311.294	1.28748	26.4153	2.5453	0.305616	0.280798	0.0487399	-4.35875
	827	Ile Leu Thr	0.704011	208.379	346.233	1.30734	1.77854	2.19273	0.699089	0.369642	0.735065	-0.444056
	828	Leu Tyr Lys Val	0.703505	339.101	522.324	0.55712	1.20148	0.604205	0.412036	0.286271	0.463695	-1.10875
	829	Stearoylethanolamide	0.701991	520.79	328.32	1.2214	1.65644	0.125779	0.568709	0.329835	0.737363	-0.439553
	830	PI(16:0/15:0)	0.701849	595.656	797.515	0.264913	1.35702	0.695773	0.342835	0.28082	0.195217	-2.35685
	831	Deacetyldiltiazem	0.700817	252.112	373.157	0.00296052	0.00423189	0.0810353	0.281266	0.280781	0.699574	-0.515451
	832	Gly Val Met Ala	0.700545	145.268	377.174	1.26748	2.16568	1.16032	0.426352	0.289569	0.58526	-0.772851
	833	1,2,3,4-tetrahydro-2,5,8-trimethyl naphthalene	0.699845	399.168	175.148	1.41427	1.52715	0.852223	0.738908	0.381481	0.926082	-0.110788
	834	Chalcomycin	0.698964	396.262	701.37	1.05735	1.22124	0.265582	0.907377	0.430376	0.865797	-0.2079
	835	Moxifloxacin	0.695715	369.507	421.316	0.613576	1.2721	0.29889	0.364887	0.280831	0.482331	-1.0519
	836	Phe Arg Thr Glu	0.694805	483.398	552.267	1.81808	7.0174	0.644281	0.334682	0.280816	0.259082	-1.94852
	837	o-Hydroxyatorvastatin	0.693619	318.874	575.254	0.00648138	1.97447	0.759336	0.176345	0.280654	0.0032826	-8.25094
	838	Met Tyr Tyr Thr	0.69163	206.539	577.233	0.990303	1.2913	0.106384	0.581411	0.333627	0.766903	-0.382884
	839	3-Oxo-5beta-chola-7,9(11)-dien-24-oic Acid	0.69156	379.644	371.257	1.04918	3.74122	1.14557	0.0862781	0.280297	0.280439	-1.83424
	840	(1R,2R)-3-oxo-2-pentyl-cyclopentaneoctanoic acid	0.689498	397.035	297.242	0.673509	2.171	1.09	0.231414	0.280735	0.310229	-1.68859
	841	Naringenin	0.689471	294.66	273.075	0.150964	0.268735	0.0420713	0.366757	0.280831	0.561758	-0.831979
	842	Quinoline	0.688621	256.266	130.065	0.908338	1.32867	0.200658	0.466958	0.300079	0.683642	-0.548687
	843	Ala Pro Tyr Gln	0.688111	227.1	478.219	0.031062	0.0396645	0.106474	0.801913	0.400382	0.783118	-0.352699
	844	9(Z),11(E),13(E)-Octadecatrienoic Acid methyl ester	0.687349	532.317	293.247	2.98227	12.1224	0.96175	0.413433	0.286599	0.246013	-2.02319
	845	gamma-Glutamylleucine	0.685991	175.933	261.144	0.521849	0.559968	0.409052	0.850762	0.414658	0.931927	-0.101711
	846	Met Trp Ser Lys	0.685476	483.486	551.264	1.76769	6.79157	0.871211	0.334435	0.280815	0.260277	-1.94188
	847	3,7,11,15-Tetramethylhexadeca-1,3E,6E,10E,14-pentaene	0.68406	453.688	275.273	1.1599	39.1515	1.72182	0.312082	0.280803	0.0296258	-5.077
	848	Pro Ala His His	0.683722	296.251	461.23	1.08043	3.61512	0.761197	0.303575	0.280797	0.298864	-1.74244
	849	Sulfisoxazole	0.683441	153.307	268.078	2.29111	48.6898	0.221302	0.331953	0.280814	0.0470552	-4.4095
	850	Isopropyl formate	0.683423	87.1942	89.0602	1.15004	2.89849	0.166413	0.341397	0.280819	0.396771	-1.33362
	851	5(Z),11(Z),14(Z)-Eicosatrienoic acid	0.683354	436.664	307.263	1.30988	21.194	2.49077	0.292436	0.28079	0.0618043	-4.01615
	852	His Trp Trp Gly	0.682558	343.78	585.26	0.372075	1.71787	1.17565	0.28944	0.280787	0.216591	-2.20696
	853	4-[3]-ladderane-butanoic acid	0.680649	428.811	249.185	1.8809	3.09844	0.56877	0.46958	0.300746	0.607046	-0.720122
	854	Ala Val Gln	0.677886	141.512	317.181	1.35722	1.96349	2.31877	0.649806	0.354512	0.691229	-0.532764
	855	Picrasin G	0.677131	174.188	393.191	0.96027	1.92895	0.997151	0.372263	0.280876	0.497821	-1.0063
	856	Aprobarbital	0.676858	178.919	211.108	0.623282	2.33049	1.22529	0.10835	0.280439	0.267446	-1.90268
	857	10-Hydroxymorroniside	0.676763	44.2182	423.146	0.611315	1.88465	0.118369	0.00652966	0.272036	0.324364	-1.62431
	858	Chimyl alcohol	0.676199	532.859	317.304	0.629836	0.778879	0.340958	0.648547	0.354131	0.808644	-0.306423
	859	(20S,22E)-3beta-Hydroxychola-5,16,22-trien-24-oic Acid	0.676	320.812	371.257	0.424168	0.700625	0.253113	0.351146	0.280824	0.605413	-0.724008
	860	Asn Phe	0.675967	169.062	280.129	1.24391	2.27179	1.48544	0.496089	0.30823	0.547544	-0.868952
	861	Lys Thr Cys Asp	0.675917	319.425	466.202	0.256365	1.10179	0.742559	0.0609197	0.280008	0.232681	-2.10358
	862	Atenolol	0.674952	168.362	267.17	0.0776416	2.00213	1.28733	0.164275	0.280629	0.0387795	-4.68856
	863	Ser Glu Val	0.674567	141.594	334.16	0.976147	1.39405	2.47642	0.675956	0.362497	0.700226	-0.514108
	864	Biliverdin	0.67347	343.887	583.254	0.199483	0.554435	1.301	0.0545845	0.279893	0.359795	-1.47475
	865	6,11-hexadecadienal	0.670519	464.768	237.221	1.4966	4.11334	0.550725	0.376075	0.280928	0.363841	-1.45862
	866	9(E),11(E)-Conjugated Linoleic Acid	0.667126	400.796	281.247	1.25527	2.71927	0.297209	0.400023	0.283485	0.461621	-1.11522
	867	Asn Lys His Cys	0.664394	242.167	501.221	0.00908685	0.789908	0.796698	0.325634	0.280811	0.0115037	-6.44176
	868	Theaspirone A	0.662789	427.762	209.153	1.25919	4.17698	1.40692	0.293045	0.28079	0.301458	-1.72997
	869	Leu Phe	0.66227	252.473	279.166	1.80133	4.54191	1.57858	0.167075	0.280635	0.396603	-1.33423
	870	L-prolyl-L-proline	0.662192	34.9513	213.123	1.69063	1.82333	0.62849	0.764766	0.389131	0.927224	-0.109011
	871	Anandamide (18:4, n-3)	0.660468	444.307	320.255	0.972781	2.47518	1.37573	0.204258	0.280701	0.393013	-1.34735
	872	Butaprost	0.659703	314.599	391.283	1.03933	1.38908	0.126256	0.485039	0.30486	0.748214	-0.418478
	873	PC(22:1(11Z)/0:0)	0.659697	295.152	578.415	0.610613	1.41181	0.421856	0.225644	0.280728	0.432502	-1.20922
	874	Methoxamine	0.659189	244.714	212.128	0.840794	1.21541	1.6586	0.309094	0.280801	0.691776	-0.531624
	875	Gln Val Ile	0.65915	186.279	359.228	1.36933	1.88831	2.38891	0.680976	0.364065	0.725164	-0.46362
	876	Calcitroic acid	0.655582	444.12	375.25	1.13732	4.19071	0.1294	0.410838	0.285988	0.27139	-1.88156
	877	5-(3',5')-Dihydroxyphenyl-gamma-valerolactone	0.655485	224.461	211.096	2.23244	11.2322	0.126506	0.369738	0.28084	0.198753	-2.33095
	878	Thr Phe Leu	0.653814	220.458	380.217	1.28176	2.11008	2.34686	0.583167	0.334145	0.607445	-0.719173
	879	Glutamine	0.652559	30.9368	147.076	0.562245	0.575049	2.58189	0.9728	0.44752	0.977734	-0.0324859
	880	Gly Val Lys Lys	0.651821	308.958	431.298	0.0719679	0.276824	1.20428	0.115585	0.280474	0.259977	-1.94354
	881	alpha-Linolenoyl Ethanolamide	0.650446	436.552	322.273	1.1123	1.75353	0.0856598	0.626136	0.3473	0.634322	-0.656713
	882	Aflatoxin GM1	0.650322	317.923	345.06	1.62974	42.3942	0.350272	0.336586	0.280817	0.0384425	-4.70115
	883	Gly Pro Trp Gly	0.648743	250.821	416.188	0.15382	0.416281	0.0233463	0.312085	0.280803	0.369509	-1.43632
	884	Arg Arg Met	0.645642	393.295	462.258	0.672774	1.46153	1.19917	0.155447	0.280608	0.460322	-1.11928
	885	Pirbuterol	0.644774	61.6963	241.154	0.205646	0.719101	0.425105	0.128308	0.280526	0.285977	-1.80603
	886	AM-toxin I	0.644228	235.98	446.227	0.182796	0.402267	1.00835	0.41207	0.286279	0.454414	-1.13792
	887	4E-Decenyl acetate	0.643567	459.687	199.169	1.10959	1.90876	0.275564	0.308317	0.2808	0.581315	-0.782609
	888	cis-gondoic acid	0.641387	366.379	311.294	0.776775	31.4856	2.13486	0.306908	0.280799	0.0246708	-5.34105
	889	5-(1-hydroxypropan-2-yl)isolongifolane	0.63929	459.693	265.252	1.13278	1.96861	0.224273	0.312936	0.280803	0.575421	-0.79731
	890	Phe Trp Phe	0.634145	414.981	499.238	0.000323622	5.16921	1.60788	0.237329	0.280742	6.26058e-05	-13.9633
	891	Diferulic acid	0.631986	236.023	387.107	2.58133	2.63541	0.95432	0.960335	0.444334	0.979481	-0.0299109
	892	4-Chloro-3,5-dimethoxybenzyl alcohol	0.631681	173.608	203.047	0.993028	2.63618	0.857324	0.323635	0.280809	0.376692	-1.40854
	893	(Z)-2-tetracos-15-enamidoethanesulfonic acid	0.631372	417.62	496.339	0.729817	0.790295	0.0846889	0.855334	0.41596	0.923473	-0.114858
	894	Leu Ser Asn His	0.629004	364.795	470.234	1.44333	1.74317	0.515925	0.427362	0.289797	0.827993	-0.272309
	895	Leu Ser Arg Ser	0.62784	289.007	462.266	0.0300655	0.14527	0.565318	0.175462	0.280652	0.206963	-2.27256
	896	Triacetate	0.626774	34.4941	145.05	1.03715	3.10636	2.00519	0.233222	0.280737	0.333878	-1.58261
	897	13E,15E,18Z,20Z-pentacosatetraen-11-ynyl acetate	0.62662	409.845	399.325	1.23962	1.88554	0.220972	0.512567	0.313155	0.657438	-0.605073
	898	Aspidofractine	0.625928	270.452	367.185	0.659252	0.866048	0.530644	0.290687	0.280788	0.761219	-0.393616
	899	Butyric acid	0.62072	53.6906	89.0602	1.15423	3.42079	1.38868	0.280682	0.280781	0.337418	-1.56739
	900	Scoparone	0.620423	228.457	207.065	0.337165	0.742407	0.582556	0.115338	0.280473	0.454151	-1.13876
	901	His Tyr Pro Gly	0.619121	238.903	473.21	0.190182	0.23854	0.145596	0.736826	0.380876	0.797279	-0.326844
	902	His His Met	0.618447	312.567	424.172	0.0283399	3.22567	0.368678	0.329365	0.280813	0.00878576	-6.83062
	903	13-HpODE	0.61779	435.036	295.226	1.11064	1.9826	0.0426646	0.426961	0.289706	0.560194	-0.836
	904	Piperanine	0.617067	317.916	288.159	0.268517	0.335851	0.406597	0.719254	0.375708	0.799512	-0.322808
	905	estra-1,3,5(10),7-tetraene-3,17alpha-diol	0.617026	320.759	271.169	0.526837	0.639142	0.332092	0.699927	0.369897	0.824288	-0.27878
	906	Lauryl diethanolamide	0.615044	378.502	288.253	0.909321	1.91367	1.02353	0.32646	0.280811	0.475172	-1.07348
	907	Ile Leu His	0.614526	180.227	382.244	1.51926	2.23715	2.70651	0.676244	0.362588	0.679104	-0.558295
	908	beta-Snyderol	0.613972	228.845	301.118	0.305349	0.539156	0.422315	0.368519	0.280832	0.566347	-0.820241
	909	Val Ile Ile	0.61296	216.249	344.254	1.35071	2.52246	1.82365	0.525188	0.316861	0.535472	-0.901118
	910	exo-Dehydrochalepin	0.612302	415.054	297.138	1.12822	1.67148	1.09174	0.18115	0.280663	0.674984	-0.567074
	911	9-Methyluric acid	0.611207	141.066	183.051	1.44572	1.58754	0.733222	0.876178	0.42182	0.910663	-0.13501
	912	(11Z)-8,18-propano-retinal	0.607836	356.796	325.252	1.12038	10.2615	0.757109	0.320124	0.280807	0.109183	-3.19518
	913	Isosakuranetin 7-O-rhamnoside	0.607532	263.945	433.149	0.570993	0.719037	0.00668215	0.844534	0.412876	0.794108	-0.332592
	914	Asn Gln Gln Lys	0.606642	455.362	517.272	1.37304	2.66109	0.815787	0.391826	0.282256	0.515971	-0.954639
	915	Val Lys	0.60443	32.7779	246.181	1.26378	3.06345	0.223442	0.276252	0.280777	0.412534	-1.27741
	916	Quercetin Pentamethyl Ether	0.604318	256.32	373.127	1.36926	2.16715	0.711365	0.150366	0.280595	0.631826	-0.662401
	917	Traumatic Acid	0.603677	245.594	229.143	1.20286	1.85003	0.364055	0.275714	0.280777	0.650184	-0.62108
	918	Desoxylimonin	0.60355	368.911	455.206	0.00706515	4.58634	1.05336	0.143314	0.280575	0.00154048	-9.34241
	919	cis-9-palmitoleic acid	0.602501	34.3802	277.212	0.586357	0.641611	0.358837	0.832982	0.409542	0.913882	-0.129921
	920	7a,12a-Dihydroxy-3-oxo-4-cholenoic acid	0.599861	325.108	405.263	0.674609	1.59053	1.06476	0.10848	0.28044	0.424141	-1.23738
	921	Glycyl-Tyrosine	0.599475	140.376	239.102	1.59248	2.38302	1.62037	0.613106	0.343313	0.66826	-0.581518
	922	Thr Val	0.599	37.5021	219.134	1.79138	2.02145	0.996053	0.821437	0.406171	0.886187	-0.174317
	923	6S,7R-Epoxy-3Z,9Z-octadecadiene	0.598934	530.184	265.252	1.77919	2.54377	0.0821636	0.601397	0.339676	0.699432	-0.515745
	924	Thr Tyr	0.598014	144.104	283.128	1.39855	2.26826	1.3543	0.557686	0.326604	0.616571	-0.697661
	925	7,12-Dioxo-5beta-cholan-24-oic Acid	0.597918	348.46	389.268	0.842714	1.29918	0.832972	0.091461	0.280337	0.648651	-0.624485
	926	L-(+)-Gulose	0.597403	31.6878	203.052	1.29689	3.63536	0.645245	0.236036	0.28074	0.356742	-1.48705
	927	Ala Ile Thr	0.596736	155.183	304.186	1.16782	1.63989	2.12087	0.665654	0.35925	0.712135	-0.489777
	928	Val Val Val	0.596385	182.131	316.223	1.45614	2.87689	1.28619	0.491439	0.30681	0.506152	-0.982357
	929	Linoelaidyl carnitine	0.594175	394.077	424.341	0.845521	1.64371	0.0895523	0.246083	0.280751	0.514399	-0.959039
	930	Lovastatin	0.593008	304.295	405.263	0.615845	1.20614	0.866609	0.129486	0.28053	0.510591	-0.969761
	931	3'-N-Acetyl-4'-O-(9-octadecenoyl)fusarochromanone	0.591905	407.651	599.408	2.04043	7.48091	0.192482	0.406799	0.285026	0.272751	-1.87434
	932	Met Met Pro	0.588574	290.071	378.154	0.0135702	0.0385149	1.37901	0.0400892	0.279497	0.352337	-1.50497
	933	Punicic acid	0.585563	397.312	279.231	1.13515	2.11258	0.821168	0.327484	0.280812	0.537328	-0.896126
	934	Cucurbitaxanthin B	0.585454	544.141	601.422	1.47357	4.77566	0.296033	0.403256	0.284171	0.308559	-1.69638
	935	Ala Tyr	0.584894	140.861	253.118	1.31785	2.48584	1.31663	0.488345	0.305857	0.530144	-0.915543
	936	Leu Glu	0.584328	155.327	261.144	1.30793	1.36064	2.98916	0.958074	0.443752	0.961262	-0.056999
	937	Asp Arg Asp Ala	0.583925	236.789	476.209	0.0335674	0.156703	1.00508	0.430427	0.290481	0.214211	-2.2229
	938	Fumitremorgin C	0.583316	243.662	380.191	0.376805	0.794869	1.31334	0.466371	0.299929	0.474046	-1.0769
	939	gibberellin A2	0.580524	374.067	351.18	0.219718	0.578215	0.785903	0.111602	0.280456	0.379993	-1.39595
	940	Gly Asp Gly Val	0.580332	139.801	347.155	0.918197	2.19242	0.14647	0.354262	0.280826	0.418806	-1.25565
	941	4,4-Disubstituted cyclohexenone	0.579857	232.931	348.183	1.31871	1.61799	0.573839	0.64246	0.35228	0.815027	-0.295079
	942	15(R)-Pinane Thromboxane A2	0.579118	455.358	359.294	1.59139	2.32685	0.251393	0.509483	0.312246	0.683923	-0.548094
	943	Naringin	0.577081	227.661	581.185	0.327446	0.39622	0.276704	0.874348	0.421311	0.826423	-0.275047
	944	PC(18:3(6Z,9Z,12Z)/0:0)[U]	0.576344	381.186	518.323	0.344572	0.73227	0.406492	0.392074	0.282293	0.470554	-1.08757
	945	Kuwanone H	0.574145	308.58	761.292	0.0191748	0.0306651	0.469466	0.513567	0.313449	0.625298	-0.677384
	946	Asp Thr Trp Trp	0.572861	488.05	607.253	0.755726	7.01542	1.33368	0.238692	0.280743	0.107724	-3.21459
	947	LPA(0:0/16:0)	0.572359	379.122	411.25	0.977597	3.08715	1.41928	0.0457667	0.279682	0.316667	-1.65896
	948	Ganoderol A	0.572288	485.347	439.356	1.55201	1.73709	0.240497	0.829717	0.408592	0.893454	-0.162535
	949	Asp Asp Met	0.571648	141.568	380.111	0.216729	0.345382	1.22446	0.529646	0.318232	0.627505	-0.672301
	950	Microsphaerone C_120103	0.570807	289.122	321.184	2.37277	3.19364	1.09672	0.563319	0.328236	0.742967	-0.428629
	951	5,7,8,3',4'-Pentahydroxy-3,6-dimethoxyflavone	0.568406	39.7115	363.068	0.788581	1.84701	1.12286	0.0767363	0.280211	0.426949	-1.22786
	952	6alpha-Hydroxy-3-oxochol-4-en-24-oic Acid	0.566315	321.531	389.268	0.417804	0.700524	0.243188	0.336791	0.280817	0.596416	-0.745609
	953	Myristoyl-EA	0.565046	336.493	272.258	1.94075	2.65976	0.538724	0.618063	0.344839	0.729673	-0.454679
	954	PE(13:0/0:0)	0.564851	349.378	412.245	1.25551	2.67428	1.93969	0.0843786	0.280282	0.469476	-1.09088
	955	4-Hydroxyindole	0.563748	224.349	134.06	1.03264	1.95483	1.32916	0.138136	0.280559	0.528253	-0.920699
	956	Cassaine	0.559975	379.635	406.294	1.11382	3.87327	1.00205	0.0621535	0.280027	0.287564	-1.79804
	957	Gln Ile	0.55949	151.992	260.16	1.20513	1.80686	2.01735	0.636113	0.350334	0.666976	-0.584294
	958	4,4'-Diapo-zeta-carotene	0.556225	436.312	405.351	1.60129	16.0082	1.22383	0.301109	0.280796	0.100029	-3.32151
	959	3-Methylcyclopentene	0.554184	33.2136	83.0861	1.33324	4.04878	0.827702	0.324964	0.28081	0.329294	-1.60255
	960	Lys Asn Gln Asp	0.55357	343.9	504.24	0.264416	0.602603	1.05725	0.0175844	0.277601	0.43879	-1.1884
	961	Arg Tyr Tyr	0.553133	278.735	501.245	0.301713	1.61379	0.67703	0.307824	0.2808	0.186959	-2.41921
	962	Gingerenone B	0.553083	283.58	387.179	0.0922492	0.115288	0.846254	0.476058	0.302375	0.800165	-0.32163
	963	15-methyl palmitic acid	0.55253	584.13	271.263	1.40562	20.0344	1.93593	0.307669	0.2808	0.0701604	-3.8332
	964	Pachydictyol A	0.551805	434.733	289.252	0.53113	84.7712	2.09984	0.318508	0.280806	0.00626546	-7.31836
	965	Furo[3,4-b]pyridine-3-carboxylic acid, 5,7-dihydro-2-methyl-4-(3-nitrophenyl)-5-oxo-, 2-hydroxyethyl	0.551598	327.859	359.088	0.0296651	0.12354	1.56004	0.275515	0.280777	0.240125	-2.05814
	966	9-Octadecenoic acid, 18-fluoro-, (Z)-	0.548753	453.622	301.252	0.496142	1.09065	0.484868	0.242334	0.280747	0.454903	-1.13637
	967	Aloin	0.548581	227.419	419.133	0.40672	0.446883	0.840695	0.932503	0.437085	0.910126	-0.135863
	968	Arachidyl carnitine	0.546737	461.152	456.404	1.35923	5.27996	0.406052	0.388012	0.281744	0.257432	-1.95774
	969	Lys Thr Gln Gly	0.546708	348.962	433.241	1.4057	4.47058	1.00351	0.317367	0.280806	0.314433	-1.66918
	970	3alpha,7alpha-Dihydroxy-22-oxo-5beta-cholan-24-oic Acid	0.546065	321.969	407.278	0.441353	1.30683	0.883704	0.0384284	0.279432	0.337728	-1.56607
	971	1alpha,25-Dihydroxy-16-ene-19-nor-24-oxovitamin D3	0.544517	406.163	417.295	0.993335	1.98478	0.651498	0.335868	0.280816	0.500477	-0.998624
	972	Glu Asp Val	0.544482	145.761	362.155	0.767993	0.980755	0.92926	0.610052	0.34237	0.783063	-0.3528
	973	LysoPE(20:5(5Z,8Z,11Z,14Z,17Z)/0:0)	0.542195	399.813	500.274	2.47208	3.79686	0.913409	0.12661	0.28052	0.651085	-0.619082
	974	N-ACETYL-DL-GLUTAMIC ACID	0.538454	61.3989	190.071	0.916501	1.48712	0.0221294	0.260559	0.280764	0.616291	-0.698316
	975	Glu Ile Thr	0.537459	153.996	362.192	1.12305	29.8189	1.46969	0.334543	0.280816	0.0376623	-4.73074
	976	Phe Glu	0.536755	153.853	295.128	1.33895	2.98043	1.24851	0.462637	0.298969	0.449248	-1.15442
	977	Vaccenyl carnitine	0.536686	412.034	426.357	0.938542	1.48748	0.399832	0.364005	0.28083	0.630962	-0.664376
	978	Asn Phe Gly Asn	0.533683	192.153	451.189	0.0626698	0.121914	1.96367	0.516602	0.314336	0.514048	-0.960025
	979	Adenosine	0.529437	131.155	268.104	0.685269	5.27408	3.0729	0.200899	0.280696	0.129932	-2.94418
	980	Calcium L-aspartate	0.525891	652.473	171.993	1.27246	3.49001	0.769518	0.327137	0.280811	0.364601	-1.45561
	981	1alpha,25-dihydroxy-8(14)a-homovitamin D3	0.525768	478.691	431.351	1.15098	2.02097	2.02954	0.0814036	0.280256	0.569517	-0.812189
	982	His Arg Asp Ala	0.524336	401.524	498.243	1.4817	3.05552	1.50204	0.254874	0.280759	0.484925	-1.04417
	983	Asp Tyr Asp	0.521844	35.5957	412.138	0.0736965	0.157876	0.34841	0.31034	0.280801	0.466799	-1.09913
	984	Lys Arg Phe Phe	0.520308	259.546	597.354	0.925591	2.19547	0.998411	0.0565081	0.279931	0.421591	-1.24608
	985	Oleanolic aldehyde	0.517254	471.714	441.372	1.63789	2.45272	1.00896	0.506619	0.311397	0.667785	-0.582545
	986	Citreoviridin C	0.517108	421.907	403.209	0.183764	0.353338	0.485999	0.368772	0.280832	0.52008	-0.943194
	987	Val Leu Glu	0.515491	189.577	360.212	1.16292	1.55012	2.72454	0.730726	0.379094	0.750214	-0.414625
	988	Leu Lys	0.51175	31.7563	260.197	1.23826	1.87031	1.12954	0.578909	0.332886	0.66206	-0.594967
	989	Glu Ser Asn Pro	0.50711	33.8516	446.186	0.697068	0.887054	0.0136147	0.747285	0.383901	0.785824	-0.347722
	990	(2E)-Piperamide-C5:1	0.506785	288.062	274.143	1.02436	2.04413	0.0678414	0.318179	0.280806	0.501126	-0.996756
	991	Hesperidin	0.504607	234.924	611.196	0.923746	0.967759	0.88729	0.967091	0.446065	0.954521	-0.0671514
	992	N1-Caffeoyl-N10-feruloylspermidine	0.503067	289.765	484.243	0.706157	0.972188	0.588961	0.321149	0.280808	0.726359	-0.461246
	993	Cinobufagin	0.502712	297.317	443.237	0.630017	0.718137	0.324981	0.66389	0.358727	0.877294	-0.188869
	994	Ala Gln Asp Asp	0.50211	35.882	448.167	0.567634	0.707102	0.261365	0.669299	0.360403	0.802762	-0.316956
	995	N-Methylhydantoin	0.498364	43.7273	115.05	2.02468	5.02236	0.212654	0.410771	0.285972	0.403133	-1.31067
	996	1,6-Anhydro-N-acetyl-beta-muramate	0.49567	125.424	276.107	1.54684	2.21644	1.21049	0.335996	0.280816	0.697895	-0.518917
	997	14,15-HxA3-D(11S)	0.493149	455.358	515.277	1.30835	2.72871	0.253961	0.382097	0.28129	0.479476	-1.06047
	998	Prostaglandin E2 serinol amide	0.491568	422.39	426.284	0.0860022	0.178763	0.276239	0.419544	0.288019	0.481097	-1.0556
	999	16alpha-Hydroxytestosterone	0.491522	394.428	305.211	0.239662	1.50153	1.46875	0.20912	0.280707	0.159611	-2.64737
	1000	Cholic Acid	0.489875	343.611	426.321	0.255945	0.545776	0.719843	0.0969883	0.280374	0.468955	-1.09248
	1001	Propofol glucuronide	0.488472	436.392	355.177	0.506449	1.02396	0.462881	0.422308	0.288653	0.4946	-1.01567
	1002	3-(Hydrohydroxyphosphoryl)pyruvate	0.488158	647.125	152.995	1.28687	2.91405	0.95867	0.316512	0.280805	0.44161	-1.17916
	1003	Norfuraneol	0.48805	154.643	115.039	1.1478	2.60619	0.914534	0.309862	0.280801	0.440411	-1.18308
	1004	6-Hydroxymelatonin	0.485746	214.032	249.127	1.32157	1.65642	1.11954	0.717361	0.375145	0.797845	-0.325819
	1005	Cervonyl carnitine	0.4819	367.273	472.341	0.213933	1.12063	0.251135	0.201913	0.280697	0.190904	-2.38908
	1006	Lys Val Val Arg	0.48189	474.656	501.354	1.2197	1.50626	0.320984	0.58826	0.335638	0.809754	-0.304444
	1007	4-Vinylcyclohexene	0.479979	221.814	109.101	0.842849	2.11183	1.12702	0.285147	0.280784	0.399108	-1.32515
	1008	NITRENDIPINE	0.476123	240.58	361.139	0.426362	0.742682	1.06434	0.186857	0.280673	0.574084	-0.800665
	1009	Trp Val Val	0.47331	487.525	403.237	1.25141	1.99756	1.02898	0.335046	0.280816	0.626468	-0.674686
	1010	PC(16:0/O-1:0)	0.472768	441.449	510.354	0.816004	1.11278	0.119805	0.530582	0.318518	0.733301	-0.447522
	1011	Asp Ala Gly Val	0.467341	141.524	361.171	1.00071	1.07213	2.36745	0.914692	0.432346	0.933387	-0.099452
	1012	Mucronine B	0.46718	203.7	493.28	1.0803	3.89857	1.19245	0.183837	0.280668	0.2771	-1.85152
	1013	Pizotifen	0.465186	417.623	296.146	0.567236	0.730186	0.33189	0.508793	0.312042	0.776838	-0.364314
	1014	Strictosamide	0.461859	250.378	499.205	0.181475	0.981334	0.252023	0.412808	0.286453	0.184926	-2.43498
	1015	17beta-Hydroxy-4-oxa-5alpha-estr-1-en-3-one acetate	0.459461	376.692	319.19	1.44184	2.14741	0.138365	0.49186	0.306939	0.671432	-0.574688
	1016	Irinotecan	0.451542	334.538	587.285	0.572549	1.46622	0.592474	0.296029	0.280792	0.390493	-1.35663
	1017	Chloroxuron	0.450511	146.032	291.086	0.0909856	0.523994	0.139941	0.248792	0.280753	0.173638	-2.52584
	1018	PC(22:4(7Z,10Z,13Z,16Z)/18:2(9Z,12Z))	0.449068	343.668	834.607	0.232165	0.568854	0.881089	0.117686	0.280483	0.408128	-1.29291
	1019	5-O-beta-D-Mycaminosyltylonolide	0.448894	259.664	598.357	0.90546	2.13865	1.03178	0.057679	0.279952	0.423379	-1.23998
	1020	1-H-Inden-1-one,2,3-dihydro-3,3,5,6-tetramethyl	0.448731	200.055	189.127	0.0800043	0.183565	0.741138	0.441082	0.293243	0.435835	-1.19814
	1021	Pro Ala Glu Ser	0.447652	31.1202	403.181	0.906831	1.44837	0.18349	0.675128	0.362238	0.626106	-0.675521
	1022	Gly Glu His	0.447327	35.6681	342.139	0.946343	1.64918	0.741577	0.208319	0.280706	0.573826	-0.801316
	1023	DG(14:1(9Z)/20:5(5Z,8Z,11Z,14Z,17Z)/0:0)	0.442902	562.423	585.45	0.616226	1.81587	0.406452	0.330826	0.280814	0.339357	-1.55913
	1024	Hydroxyprolyl-Isoleucine	0.441964	56.9605	245.149	0.333793	0.690052	1.26421	0.104942	0.280421	0.483722	-1.04775
	1025	Brevicolline	0.439914	166.258	266.162	0.0551118	2.41322	1.00613	0.293309	0.28079	0.0228374	-5.45246
	1026	Heteropeucenin, Methyl Ether	0.439351	252.852	275.127	0.0244261	0.0399579	0.124199	0.474027	0.301868	0.611296	-0.710058
	1027	N-hexadecanoyl-L-Homoserine lactone	0.43877	529.666	340.284	1.22608	2.48342	0.173826	0.408765	0.285496	0.493707	-1.01827
	1028	His Val Arg Pro	0.438509	277.315	508.302	0.0344143	1.19371	0.710184	0.335353	0.280816	0.0288298	-5.1163
	1029	Sannamycin A	0.435463	410.078	390.267	2.42569	4.24356	0.221822	0.58801	0.335565	0.571616	-0.806883
	1030	Pyridine	0.435294	645.868	80.0501	1.28392	3.75963	0.628794	0.336322	0.280816	0.341501	-1.55004
	1031	14-Hydroxypergolide glucuronide	0.429042	342.053	507.212	0.0304683	0.0538802	1.04953	0.196109	0.280688	0.565481	-0.822448
	1032	Isomyristicin	0.428197	221.691	193.086	2.43277	10.7563	0.0861993	0.386946	0.281663	0.226171	-2.14451
	1033	10-Tridecynoic acid	0.4277	329.159	211.169	0.972284	2.48106	0.765019	0.329333	0.280813	0.391883	-1.35151
	1034	8-Deoxy-11,13-dihydroxygrosheimin	0.427135	376.698	281.138	0.896097	2.58413	0.55232	0.328606	0.280812	0.346769	-1.52795
	1035	Callystatin A	0.42697	372.382	457.33	1.36338	3.14304	0.971092	0.218008	0.280719	0.433778	-1.20497
	1036	N2,N5-Dibenzoyl-L-ornithine	0.425213	253.709	341.147	1.14901	1.44985	1.00148	0.506755	0.311437	0.792502	-0.335514
	1037	4,8 dimethylnonanoyl carnitine	0.421968	435.75	330.263	1.07481	1.44741	0.703619	0.455046	0.29699	0.742574	-0.429392
	1038	1alpha,25-dihydroxy-10,19-methano-23-oxavitamin D3	0.421847	477.079	433.33	2.33823	10.2855	1.67356	0.39597	0.282879	0.227332	-2.13713
	1039	Valdiate	0.417685	363.289	311.185	1.19464	2.81289	0.726796	0.334534	0.280816	0.424703	-1.23547
	1040	His Trp Arg His	0.405729	353.978	635.318	2.61228	4.55979	0.201619	0.158229	0.280615	0.572895	-0.803658
	1041	Cycloneomammein	0.393127	349.022	389.185	1.02451	3.16711	0.577363	0.321196	0.280808	0.323484	-1.62823
	1042	Asn Arg Gln Gln	0.378183	195.208	545.274	0.568	1.0704	1.17844	0.18113	0.280663	0.530644	-0.914183
	1043	Anandamide (18:3, n-6)	0.376183	469.312	322.273	0.908028	3.8054	0.421539	0.199062	0.280693	0.238616	-2.06724
	1044	Asn Asn Cys Asp	0.362494	234.906	465.138	1.07318	1.0939	0.483599	0.986782	0.451051	0.981057	-0.027591
	1045	DG(22:6(4Z,7Z,10Z,13Z,16Z,19Z)/14:0/0:0)	0.361769	559.714	613.481	0.677978	1.38859	0.319629	0.355798	0.280826	0.488248	-1.03431
